# Supplementary material for: Structure-based design of 5′-substituted 1,2,3-triazolylated oseltamivir derivatives as potent influenza neuraminidase inhibitors
Source: Royal Society of Chemistry journal article supplement (doi:10.1039/d1ra00472g), 2021-01-01

## Supporting Information

### **Structure-Based Design of 5'-Substituted 1,2,3-Triazolylated Oseltamivir Derivatives as Potent Influenza Neuraminidase Inhibitors**

*Pengfei Wang, Babayemi O. Oladejo, Chenning Li, Lifeng Fu, Shanshan Zhang, Jianxun Qi, Xun Lv\*, and Xuebing Li\**

\*[lixb@im.ac.cn](mailto:lixb@im.ac.cn)

#### **Contents**

|                                                                                         |           |
|-----------------------------------------------------------------------------------------|-----------|
| <b>Table S1. X-ray Crystallographic Data Collection and Refinement Statistics. ....</b> | <b>S2</b> |
| <b>NMR, MS and IR Spectra .....</b>                                                     | <b>S3</b> |

**Table S1.** X-ray Crystallographic Data Collection and Refinement Statistics<sup>a</sup>

| Parameter                          | N5-1e                  |
|------------------------------------|------------------------|
| Data collection                    |                        |
| Space group                        | P4                     |
| Cell dimensions                    |                        |
| <i>a</i> , <i>b</i> , <i>c</i> (Å) | 109.06, 109.06, 71.15  |
| $\alpha$ , $\beta$ , $\gamma$ (°)  | 90, 90, 90             |
| Resolution (Å)                     | 50.00-2.20 (2.28-2.20) |
| $R_{\text{merge}}$                 | 0.083 (0.235)          |
| $I/\sigma I$                       | 21.1 (7.1)             |
| Completeness(%)                    | 95.6 (82.3)            |
| Redundancy                         | 5.4 (5.1)              |
| Refinement                         |                        |
| Resolution(Å)                      | 32.37- 2.20            |
| No. of reflections                 | 40762                  |
| $R_{\text{work}}/R_{\text{free}}$  | 0.2085/0.2361          |
| No. of atoms                       |                        |
| Protein                            | 6126                   |
| Ligand/ion                         | 62                     |
| Water                              | 78                     |
| <i>B</i> factors                   |                        |
| Protein                            | 39.5                   |
| Ligand/ion                         | 42.5                   |
| Water                              | 35.8                   |
| RMSDs                              |                        |
| Bond length (Å)                    | 0.009                  |
| Bond angle (°)                     | 1.215                  |
| Ramachandran plot                  |                        |
| Favored (%)                        | 95.41                  |
| Allowed (%)                        | 4.21                   |
| Disallowed (%)                     | 0.38                   |

<sup>a</sup> Values in parentheses are for the highest-resolution shell.  $R_{\text{merge}} = \frac{\sum_{hkl} \sum_i |I_i(hkl) - \langle I(hkl) \rangle|}{\sum_{hkl} \sum_i I_i(hkl)}$ , where  $I_i(hkl)$  is the observed intensity and  $\langle I(hkl) \rangle$  is the average intensity of multiple observations of symmetry-related reflections;  $I$ , the intensity of a reflection;  $\sigma I$ , the standard deviation of intensity; *B* factor, a mix of thermal displacement and disorder.

# NMR and MS Spectra

## <sup>1</sup>H NMR of 5a (500 MHz, CDCl<sub>3</sub>)

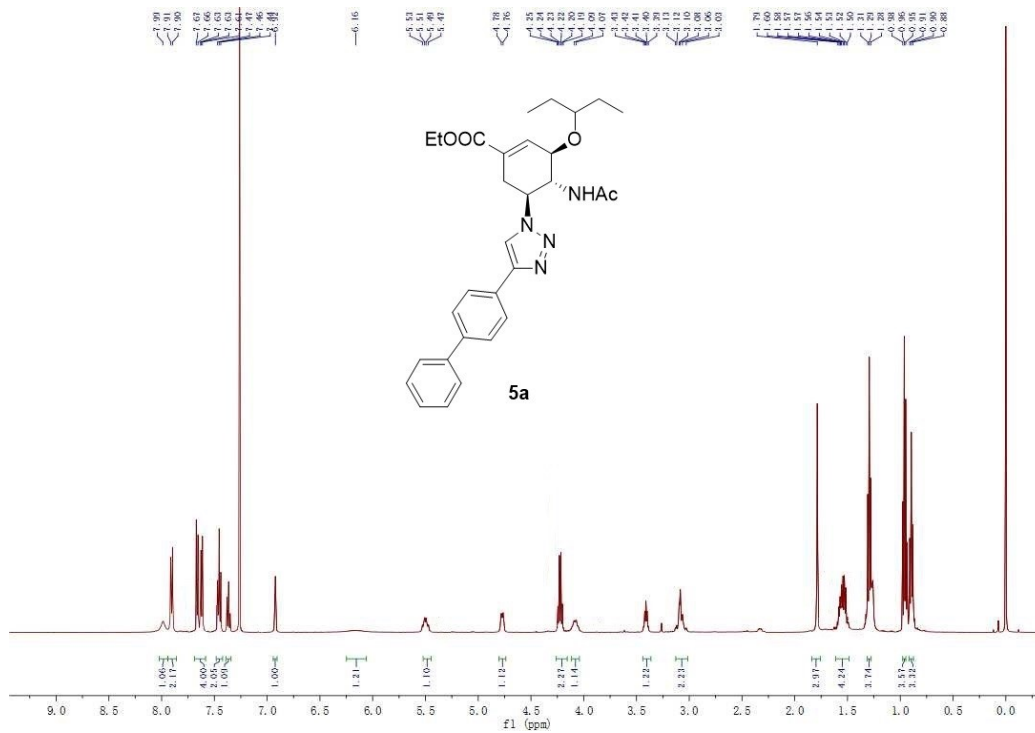

## ESIMS of 5a

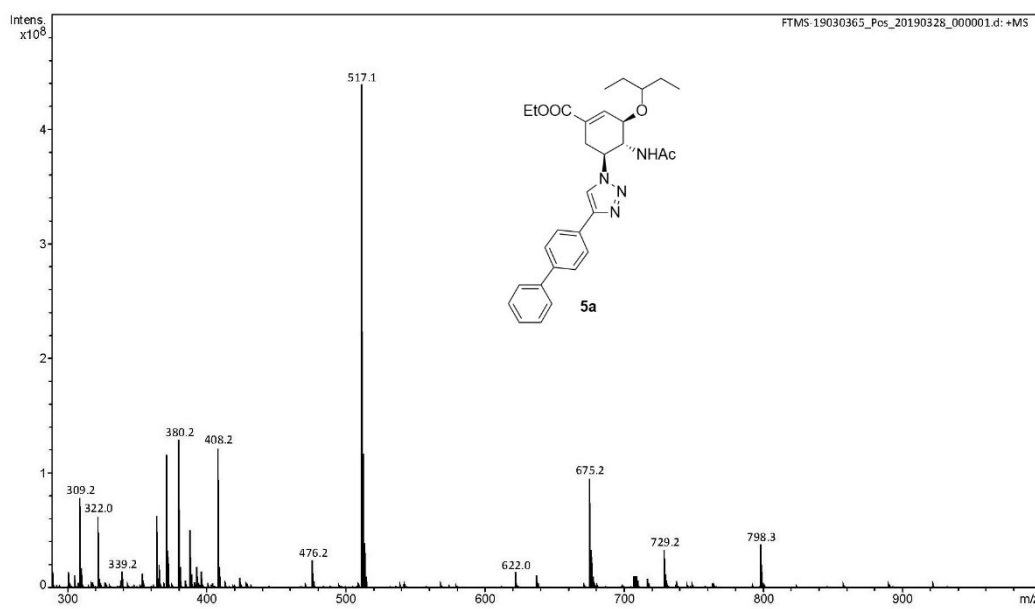

### <sup>1</sup>H NMR of 5b (500 MHz, CDCl<sub>3</sub>)

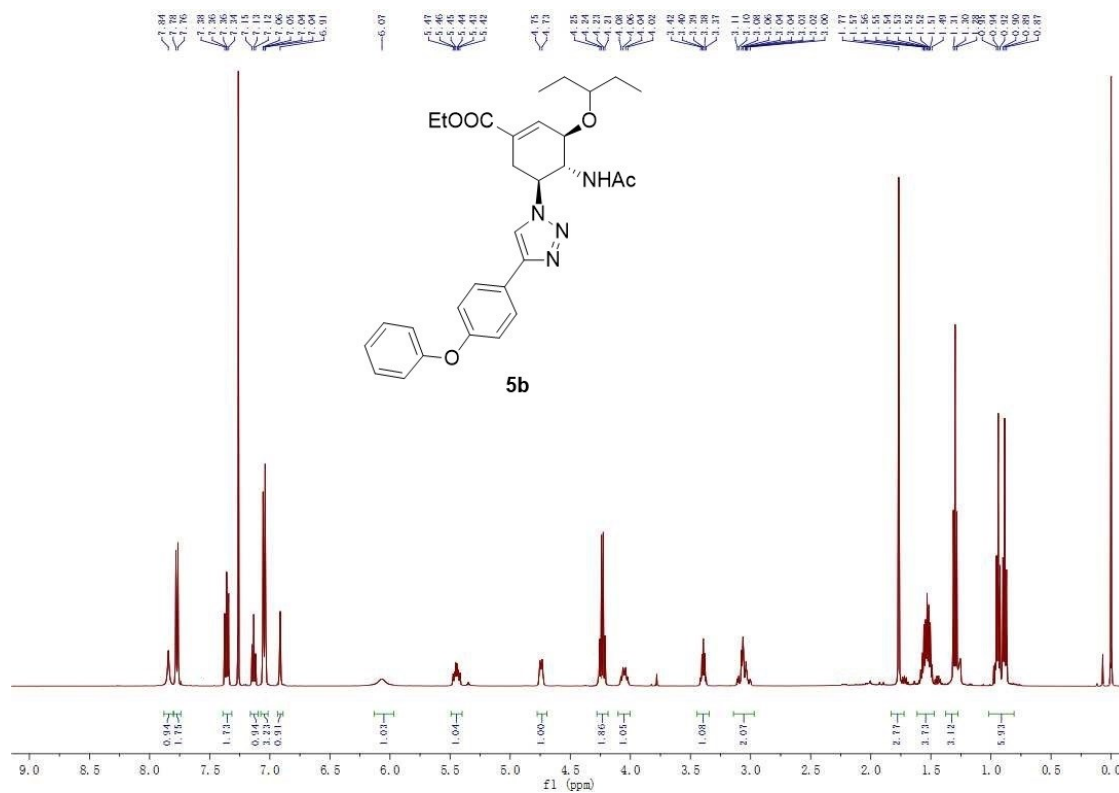

### ESIMS of 5b

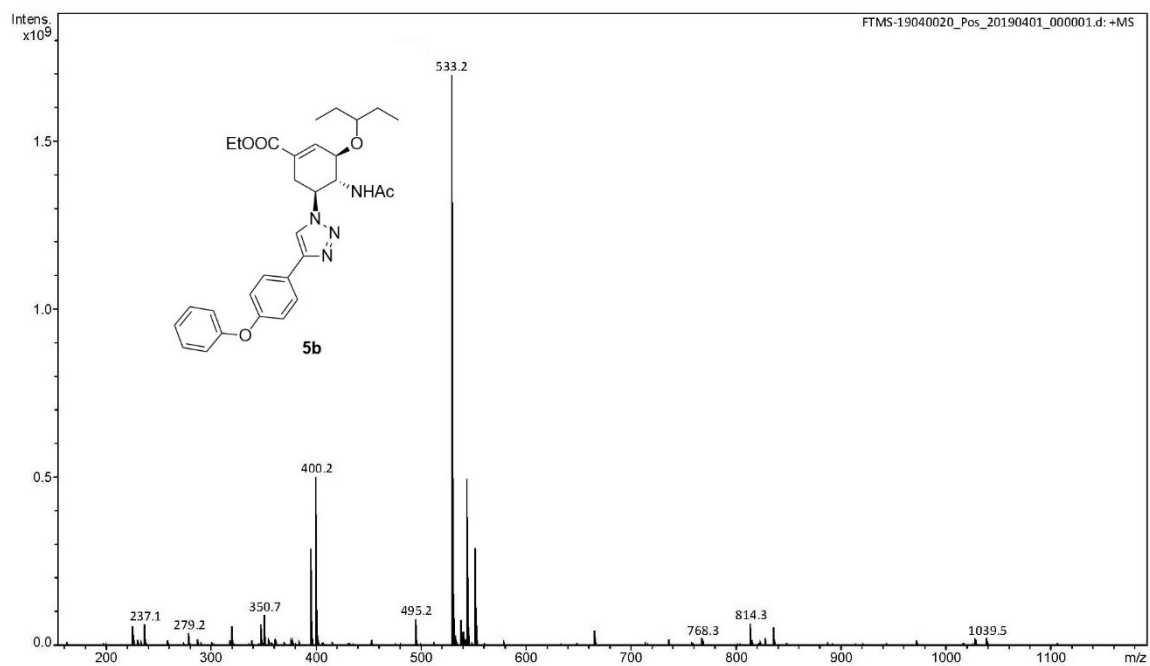



### <sup>1</sup>H NMR of 5c (500 MHz, CDCl<sub>3</sub>)

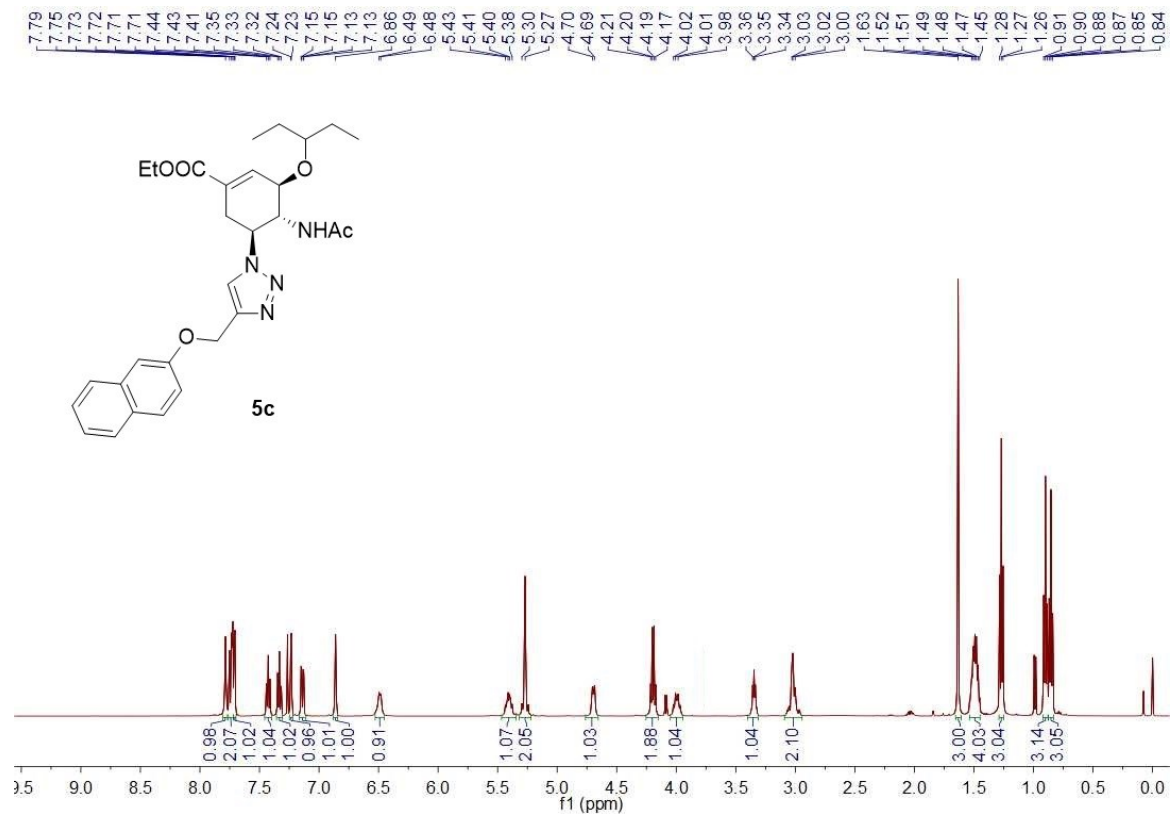

### HR-ESIMS of 5c

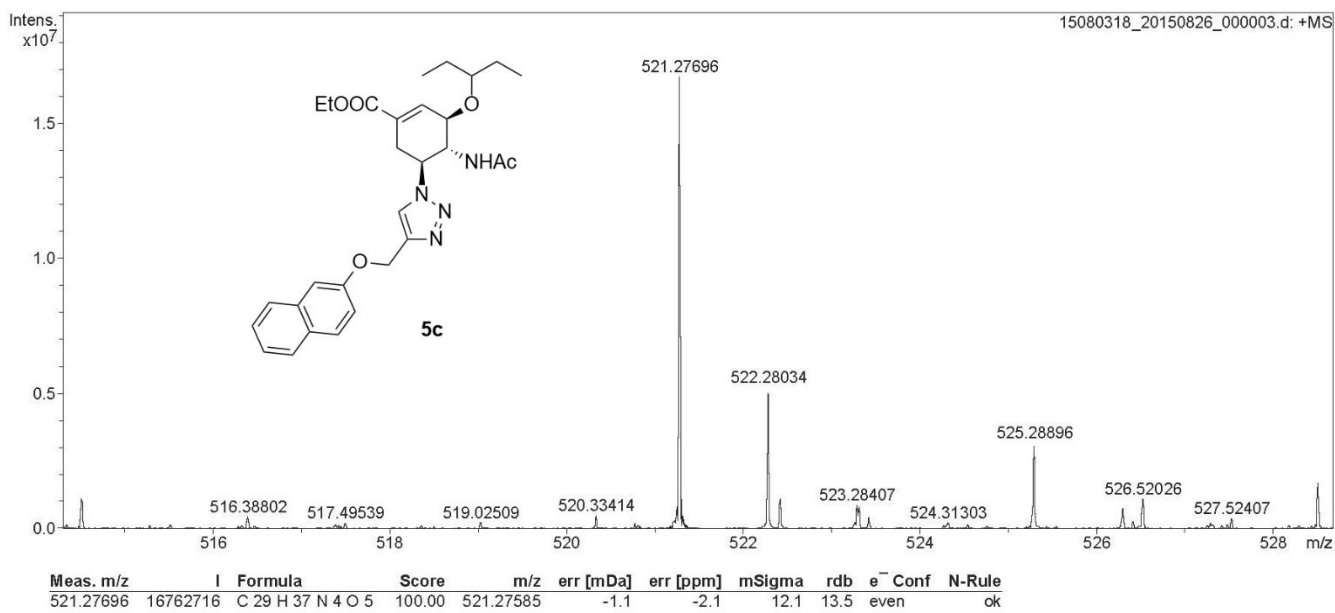

### <sup>1</sup>H NMR of 5d (500 MHz, CDCl<sub>3</sub>)

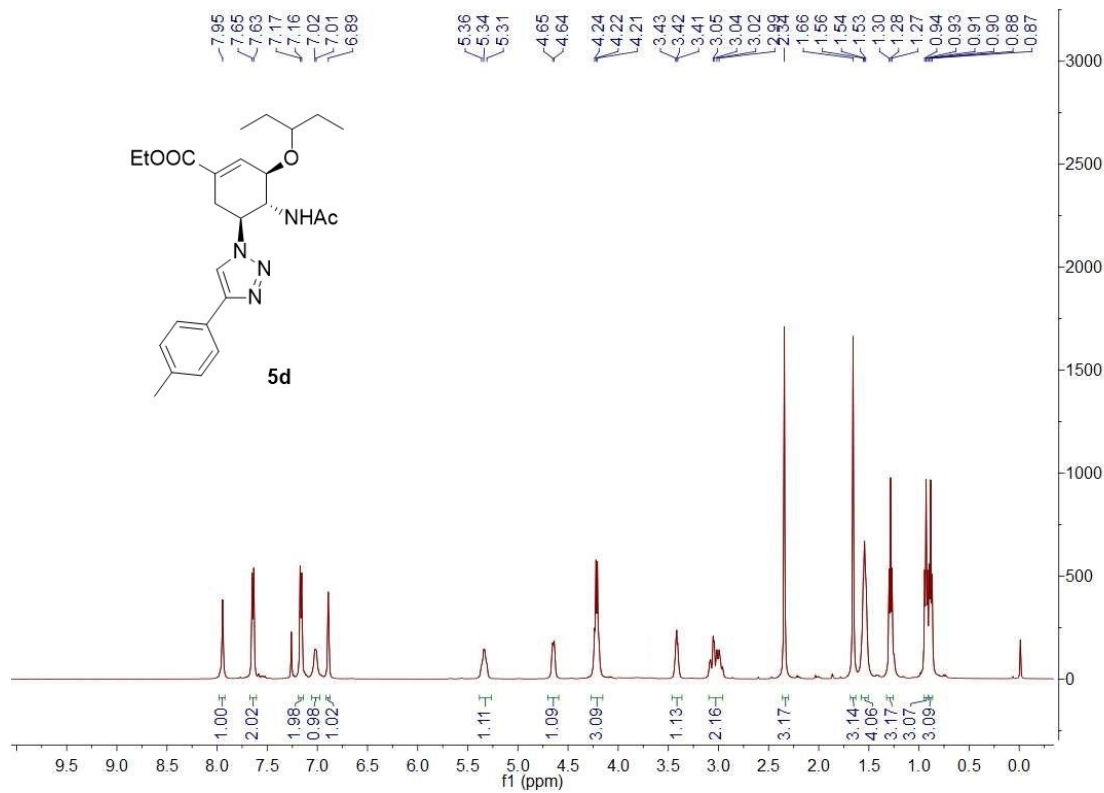

### HR-ESIMS of 5d

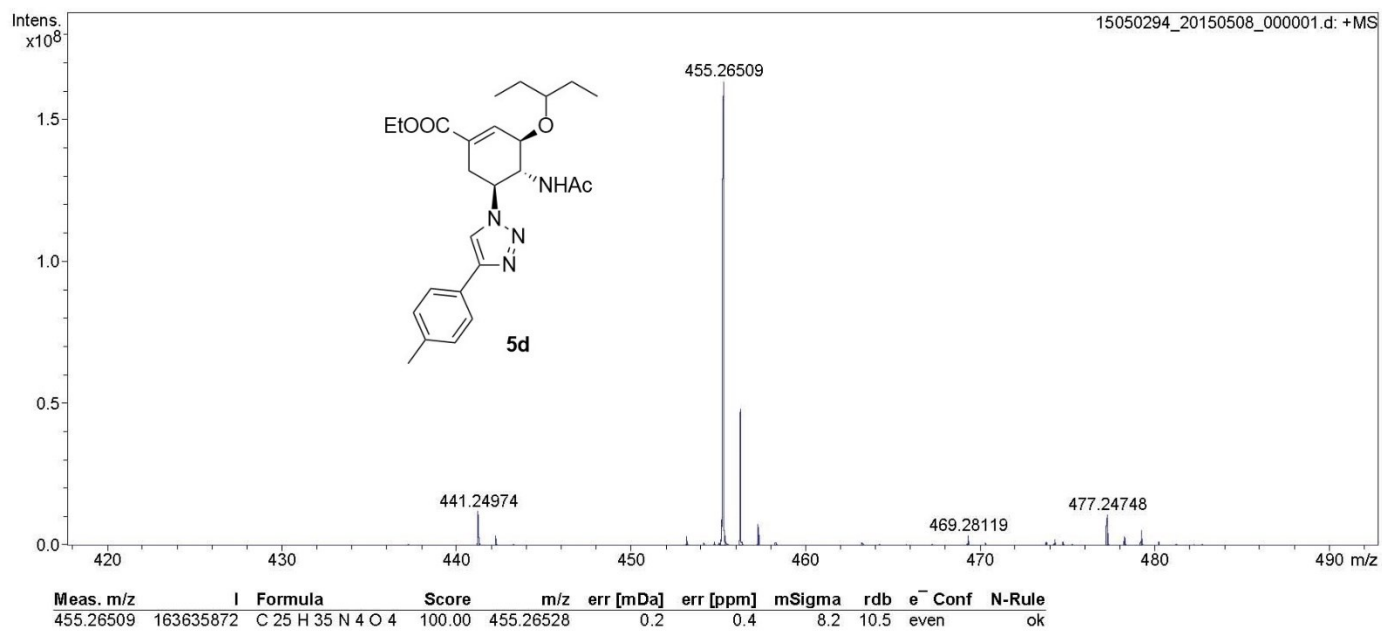

### <sup>1</sup>H NMR of 5e (500 MHz, CDCl<sub>3</sub>)

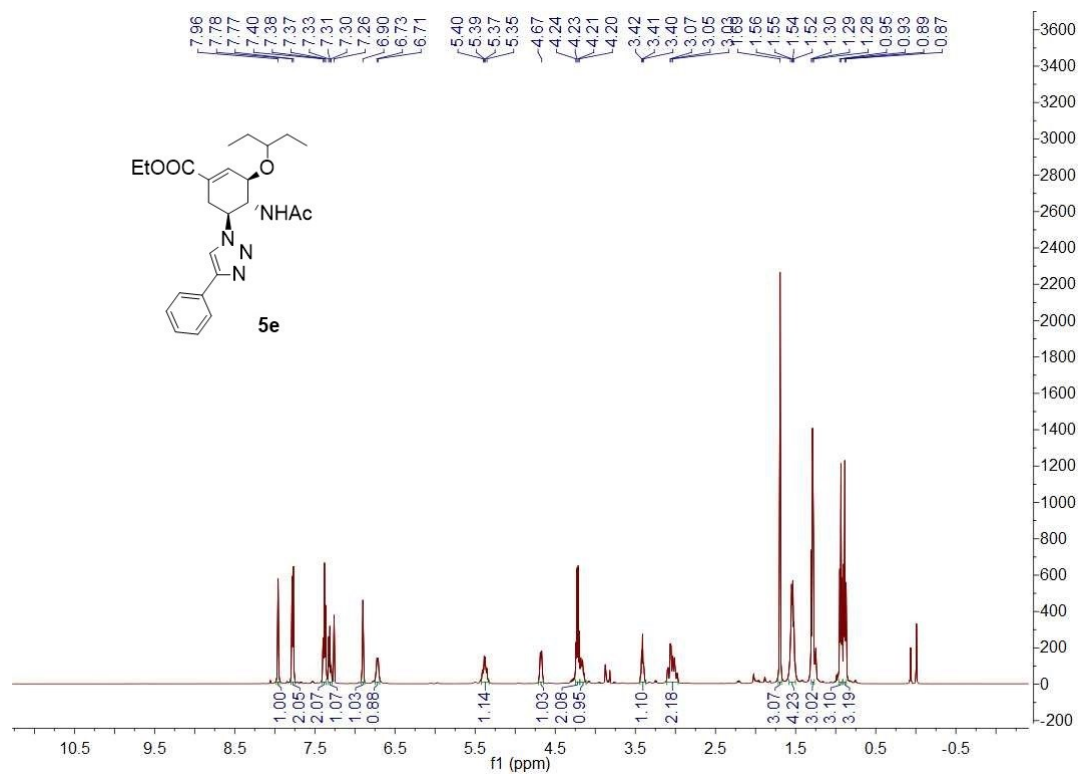

### HR-ESIMS of 5e

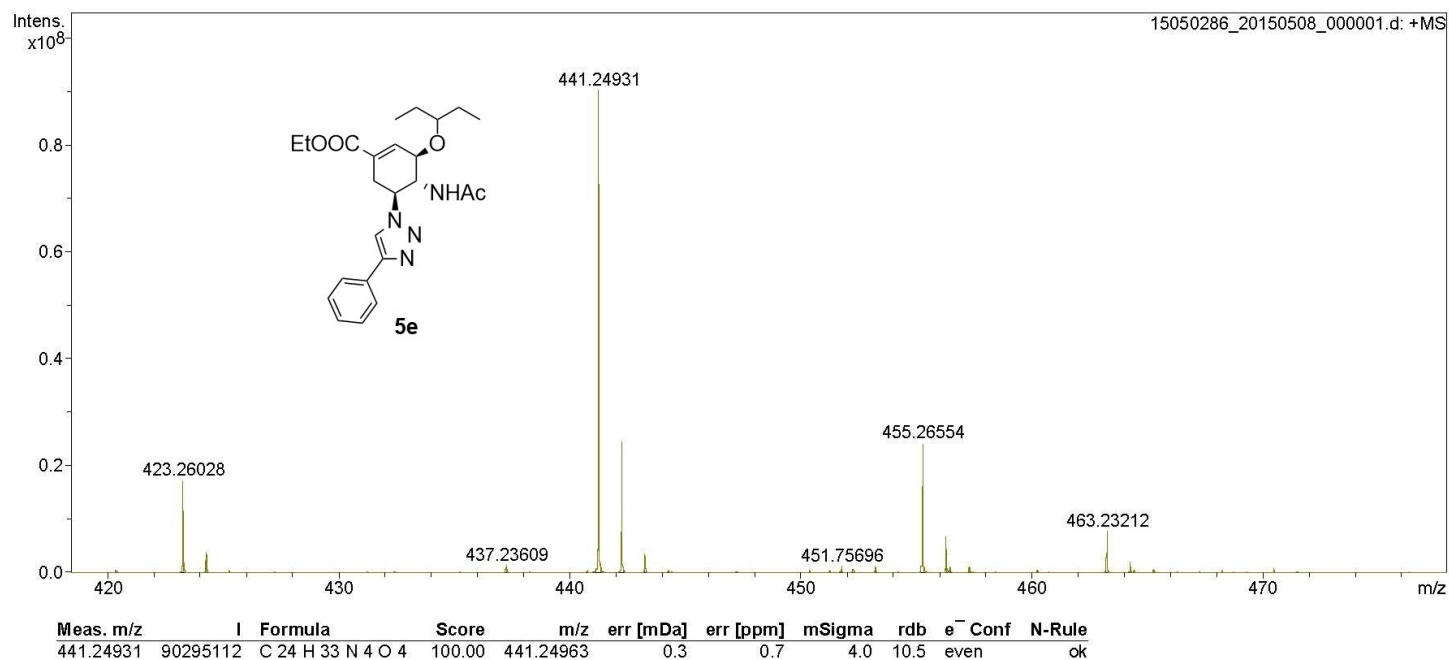

### <sup>1</sup>H NMR of 5f (500 MHz, CDCl<sub>3</sub>)

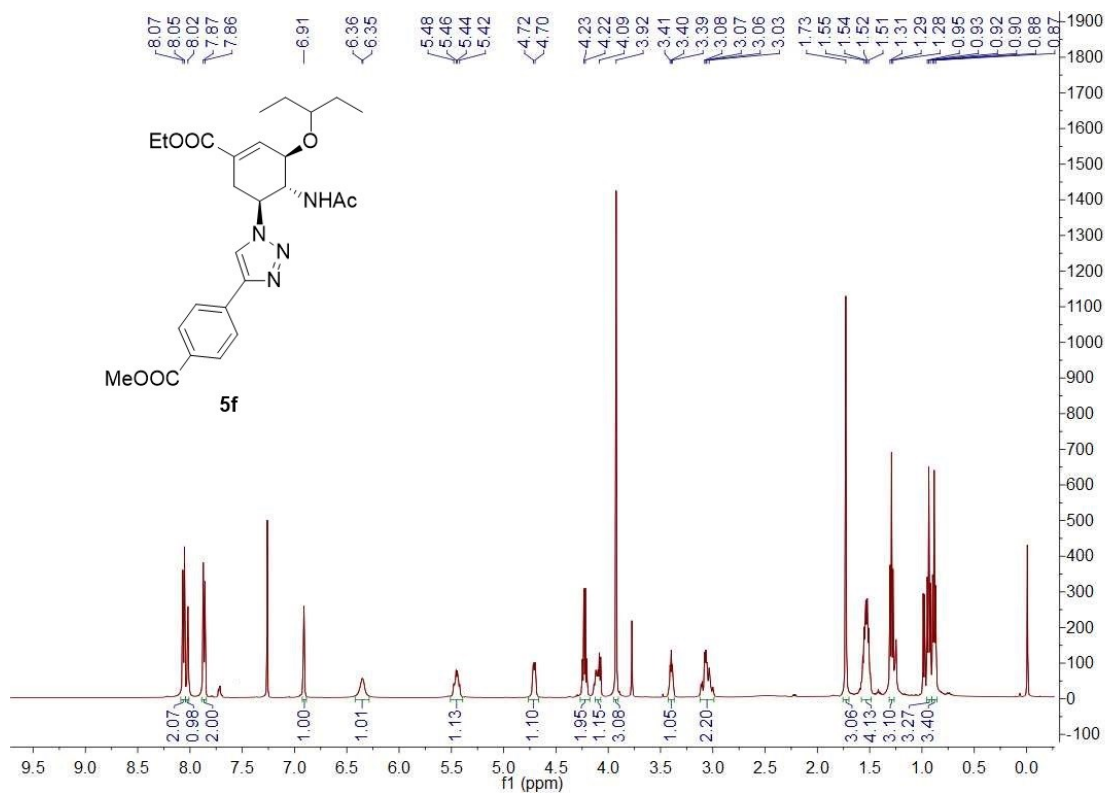

### HR-ESIMS of 5f

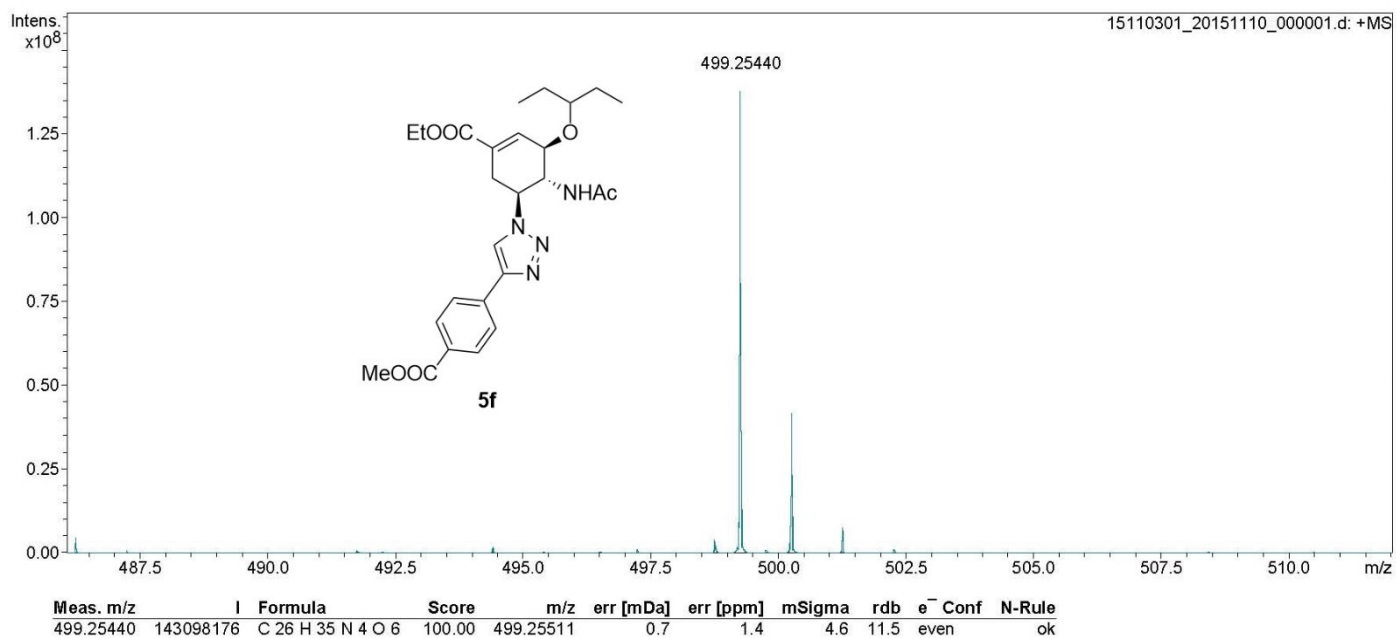

### <sup>1</sup>H NMR of 5g (500 MHz, CDCl<sub>3</sub>)

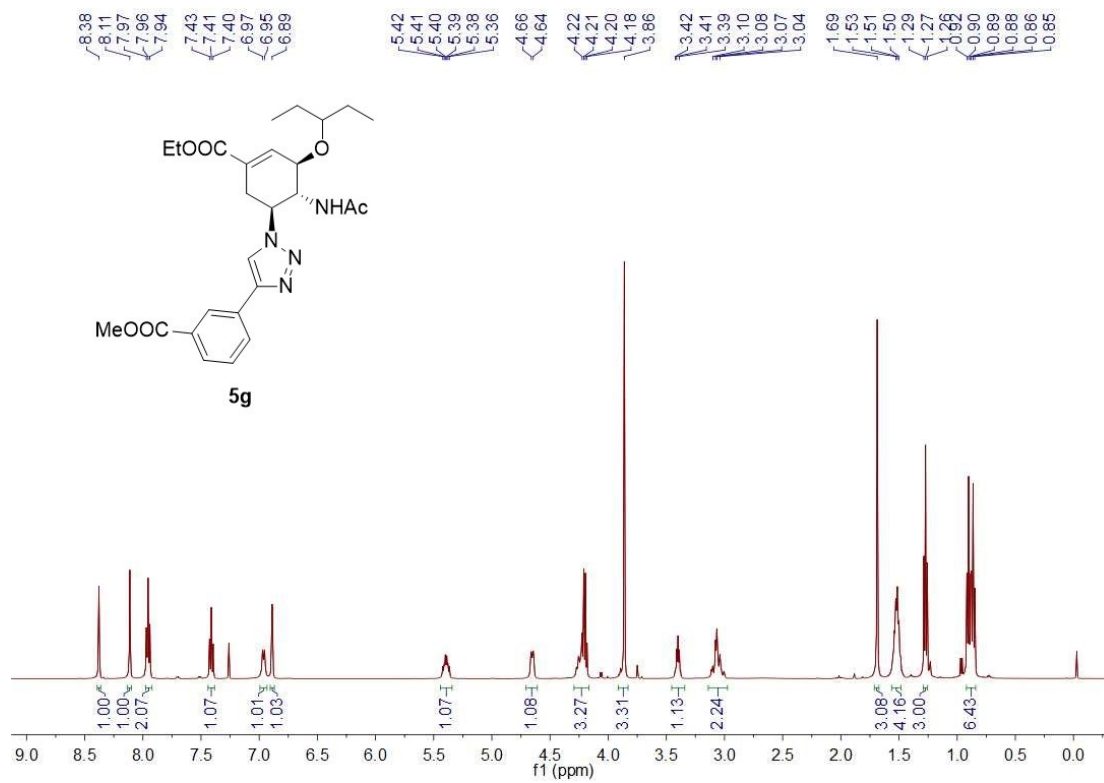

### HR-ESIMS of 5g

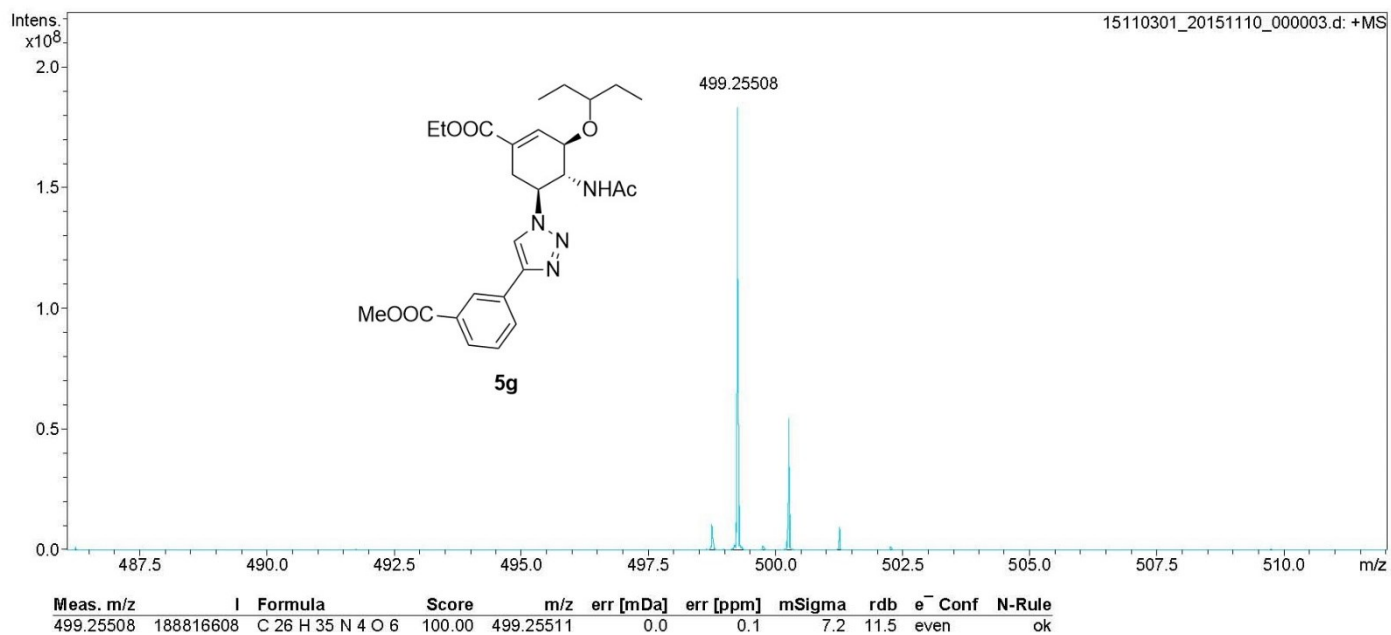

### <sup>1</sup>H NMR of 5h (500 MHz, CDCl<sub>3</sub>)

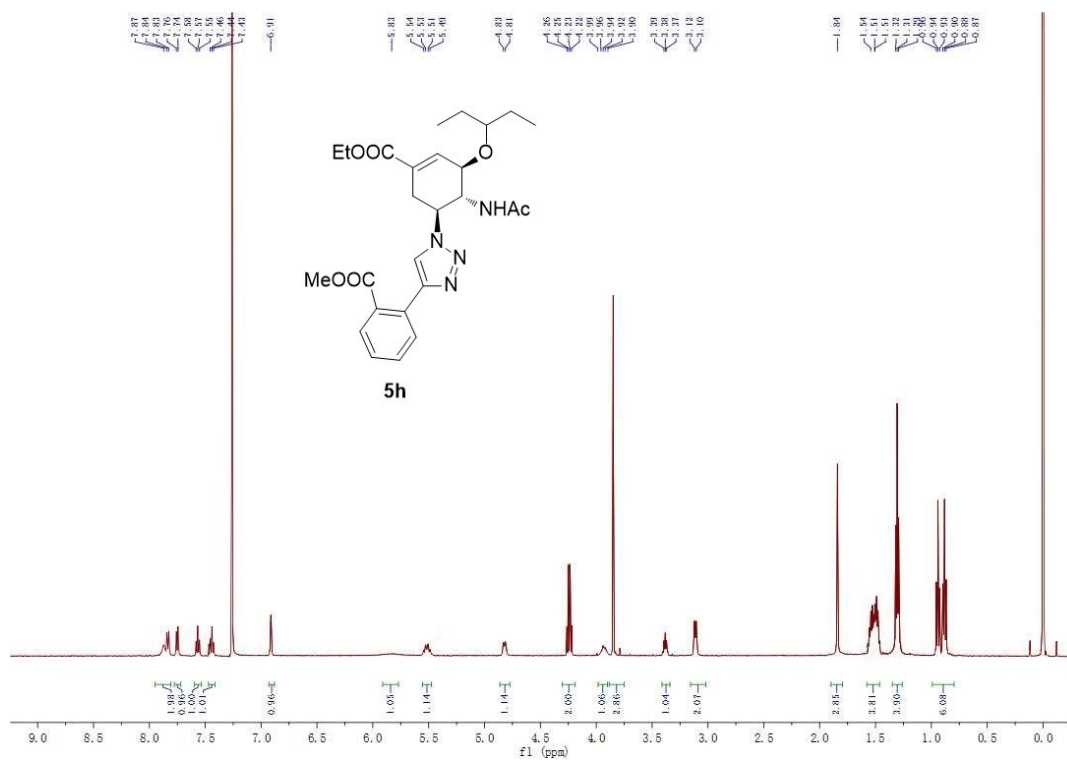

### HR-ESIMS of 5h

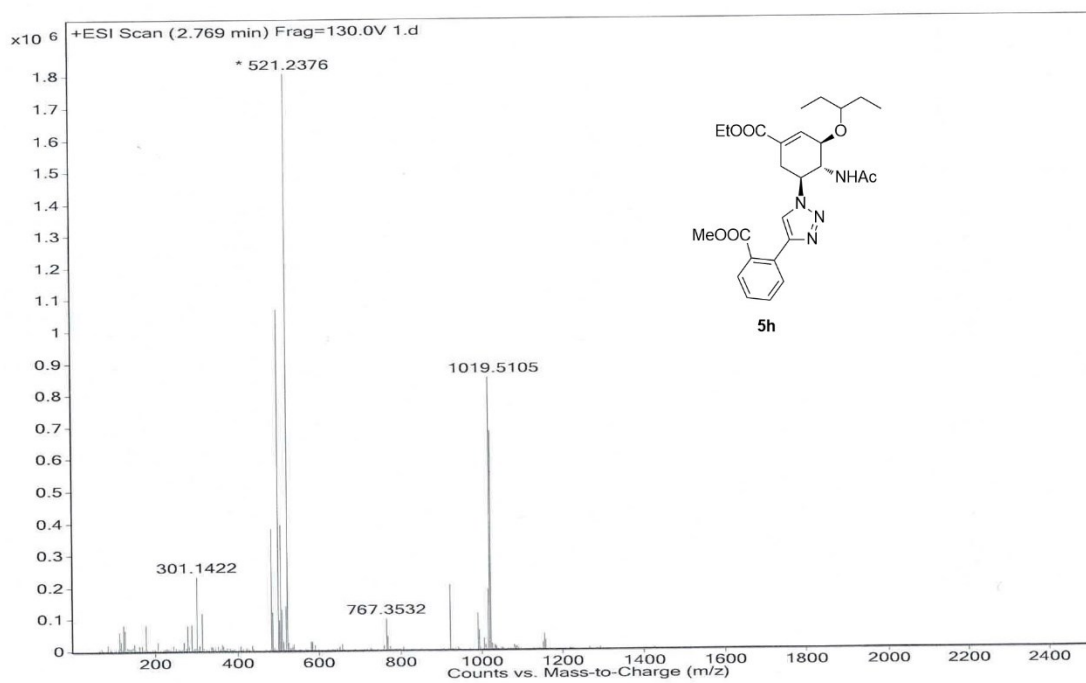

# <sup>1</sup>H NMR of 5i (500 MHz, CDCl<sub>3</sub>)

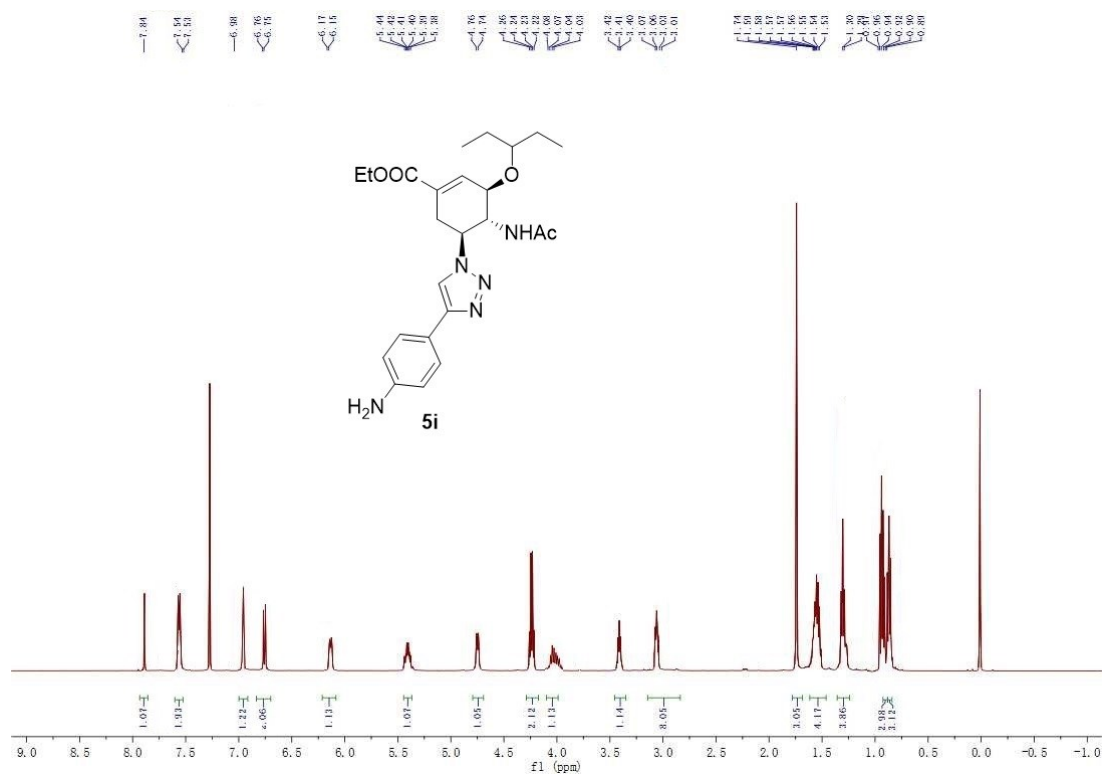

# ESIMS of 5i

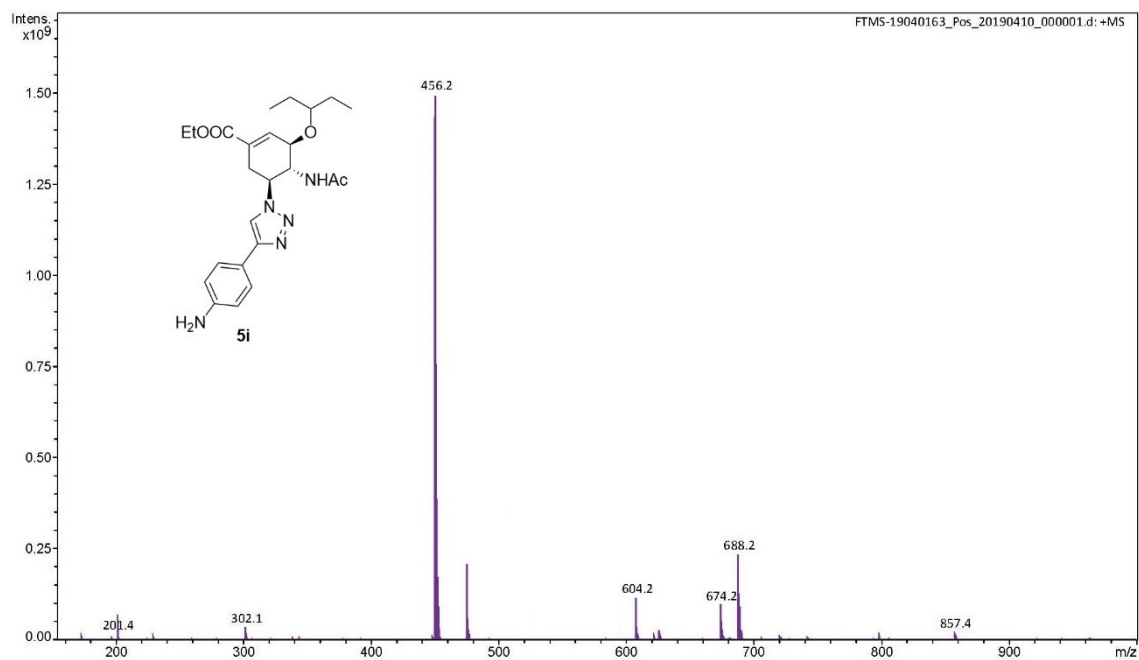

### <sup>1</sup>H NMR of 5j (500 MHz, CDCl<sub>3</sub>)

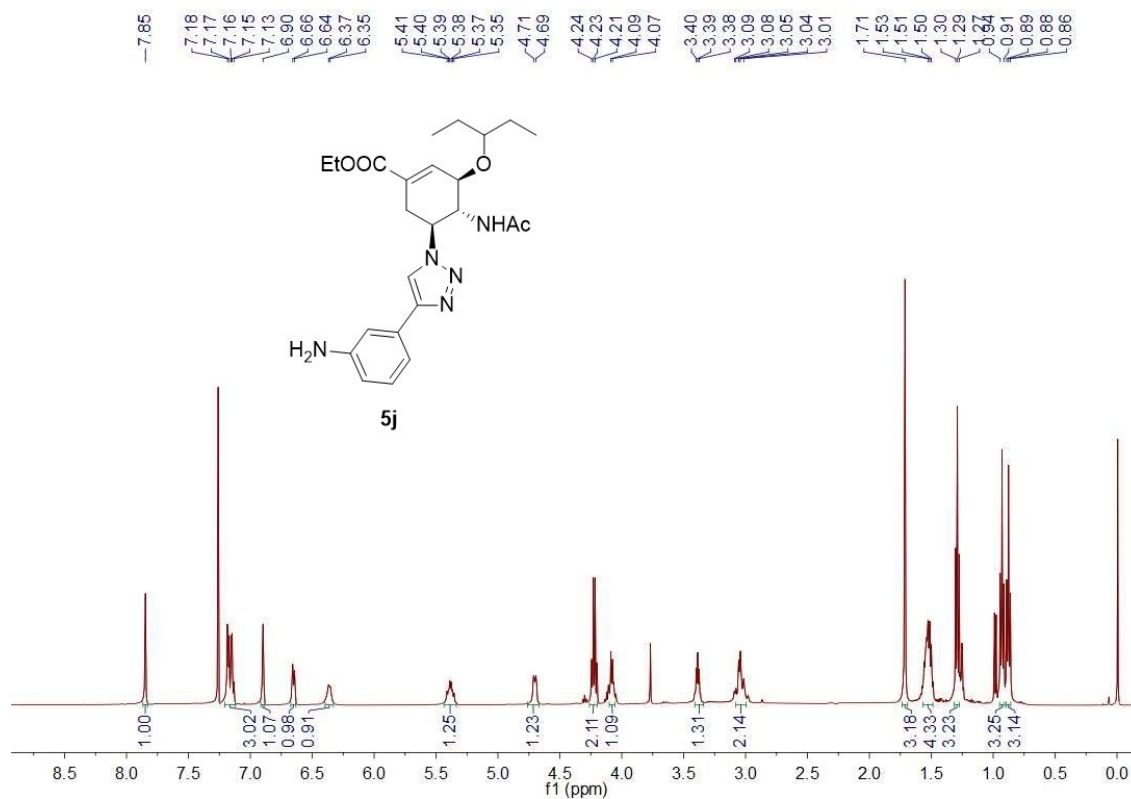

### HR-ESIMS of 5j

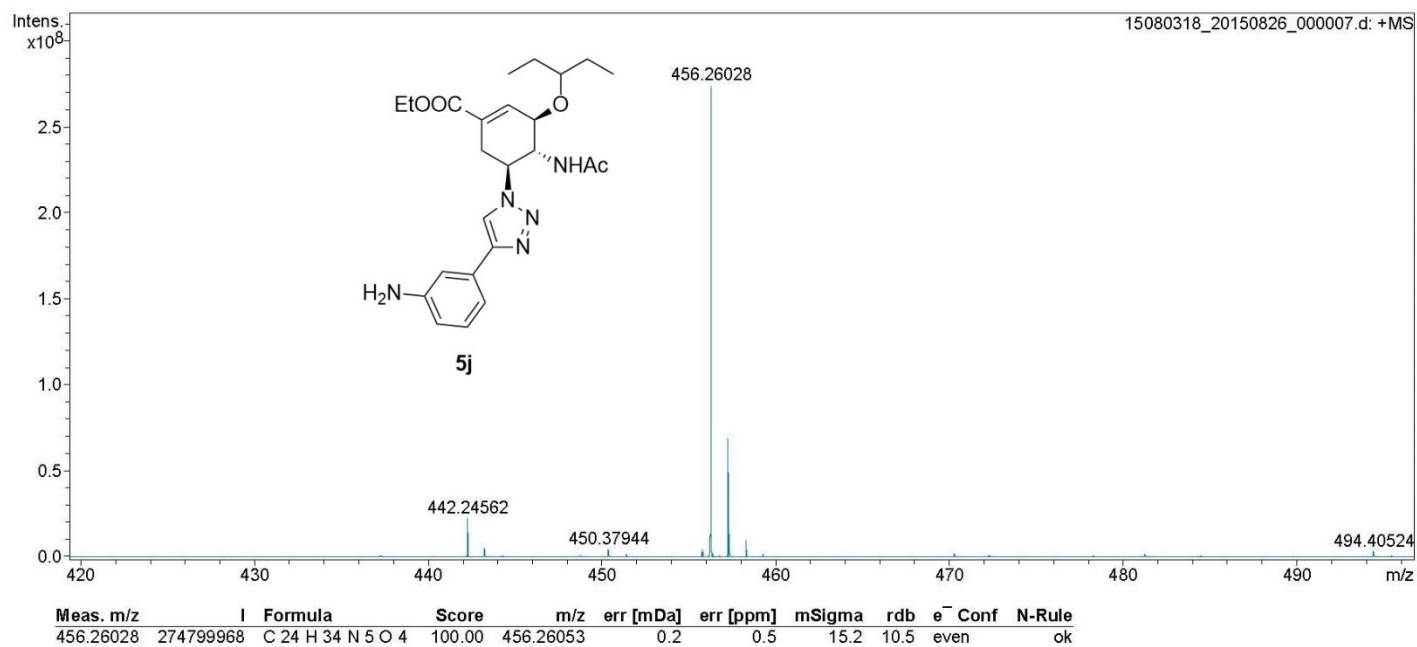



**<sup>1</sup>H NMR of 5k (500 MHz, CDCl<sub>3</sub>)**

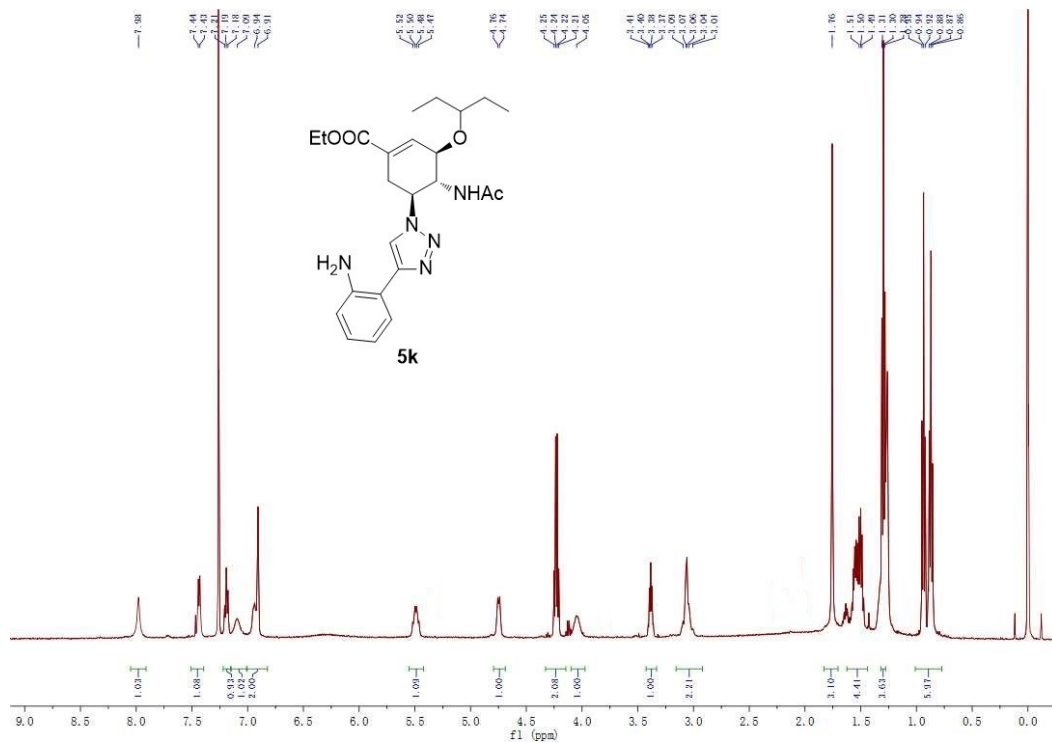

**HR-ESIMS of 5k**

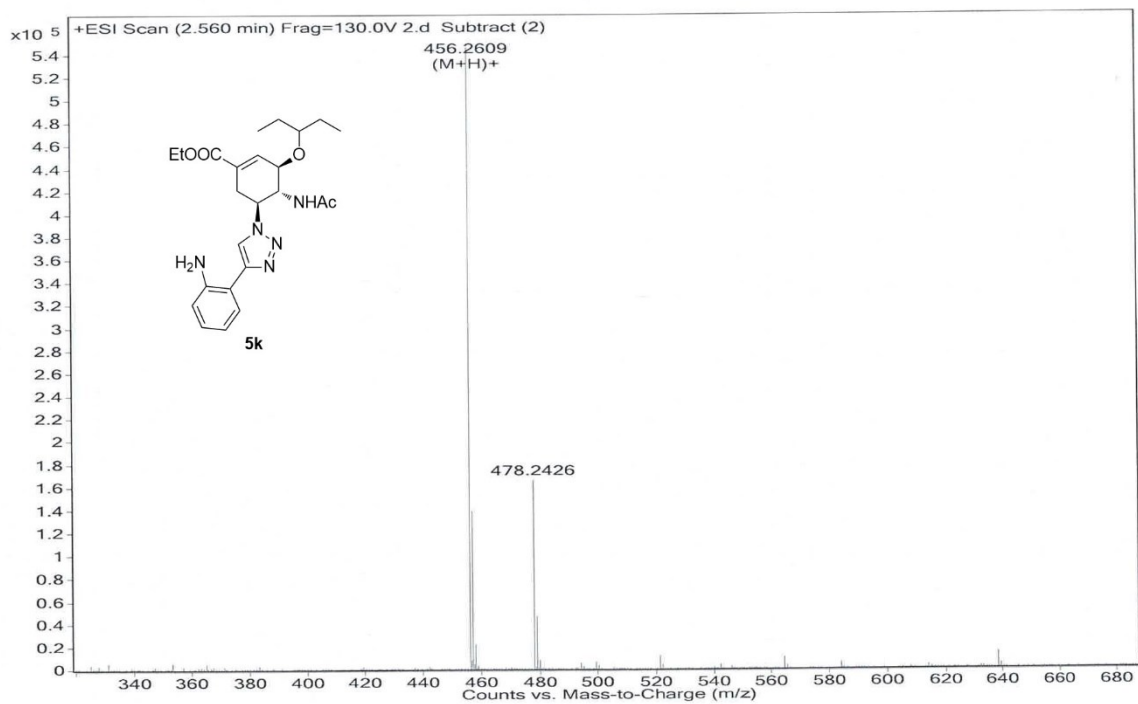

# <sup>1</sup>H NMR of 51 (500 MHz, CDCl<sub>3</sub>)

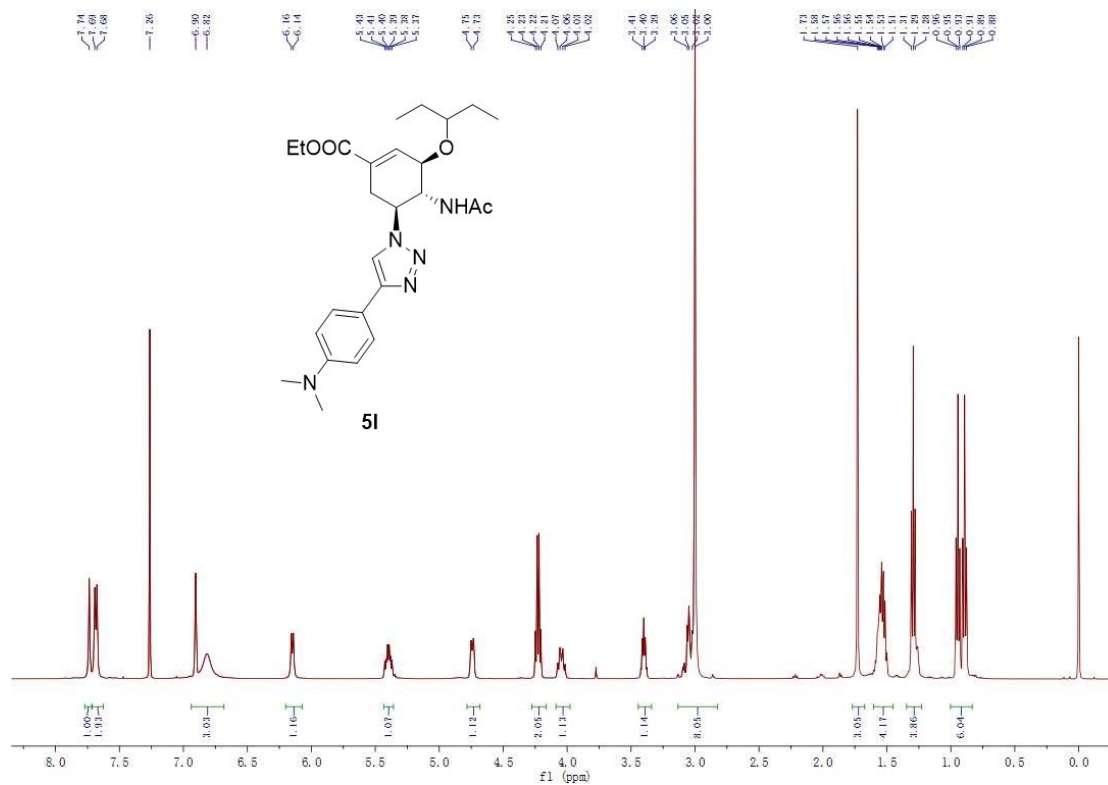

# ESIMS of 51

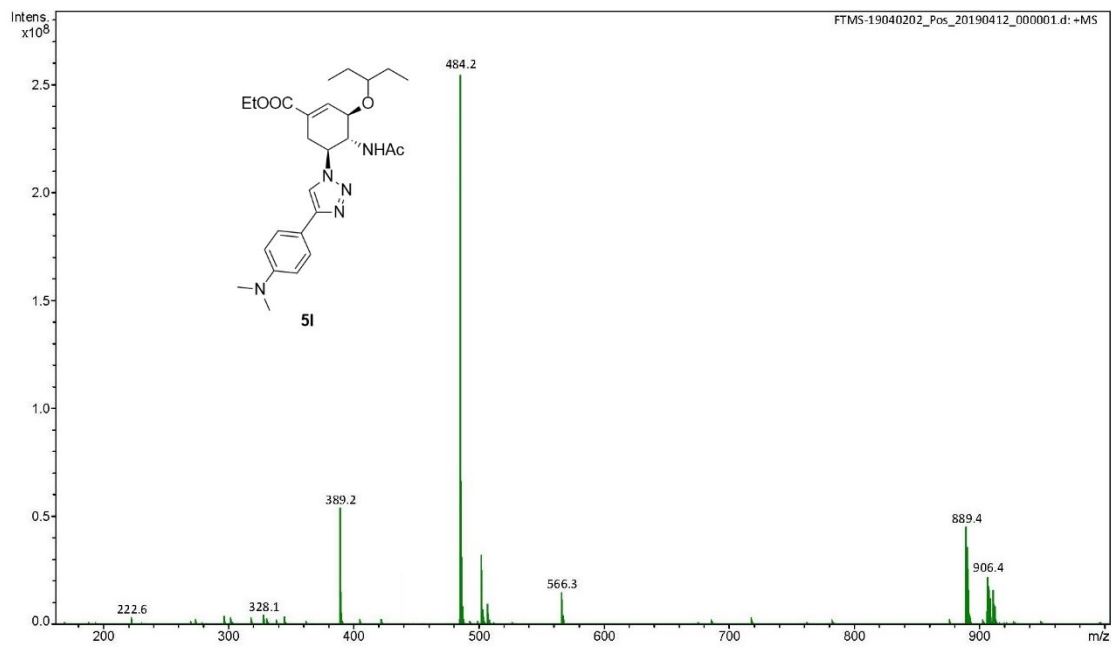

### $^1\text{H}$ NMR of 5m (500 MHz, $\text{CDCl}_3$ )

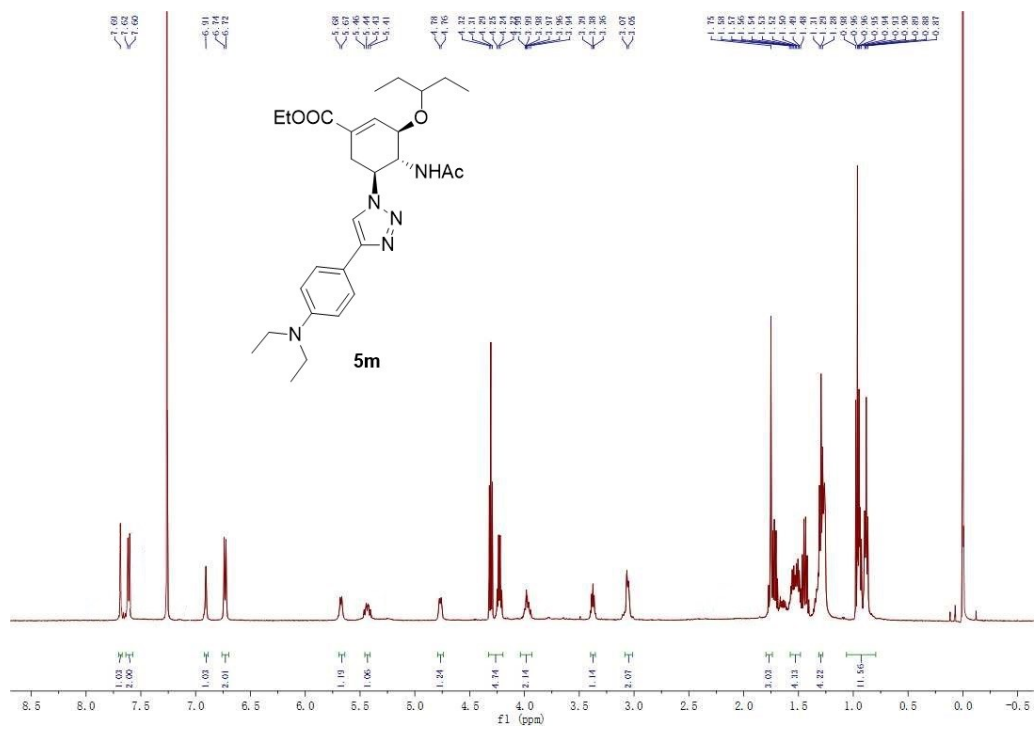

### ESIMS of 5m

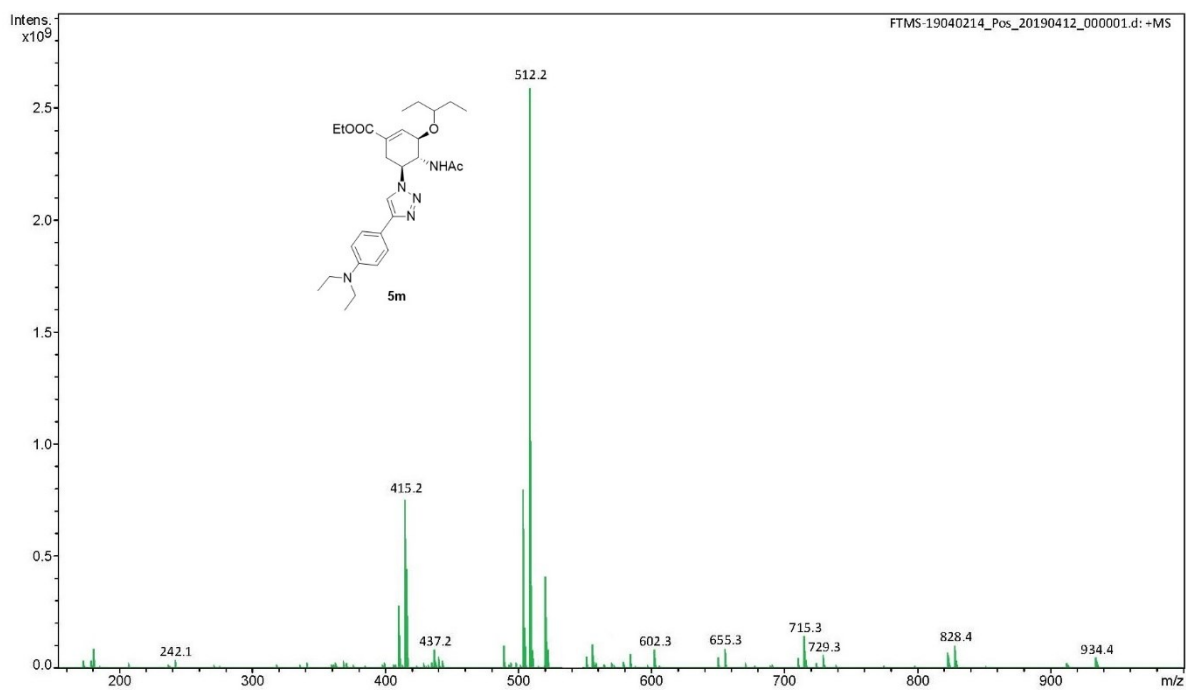

### <sup>1</sup>H NMR of 5n (500 MHz, CDCl<sub>3</sub>)

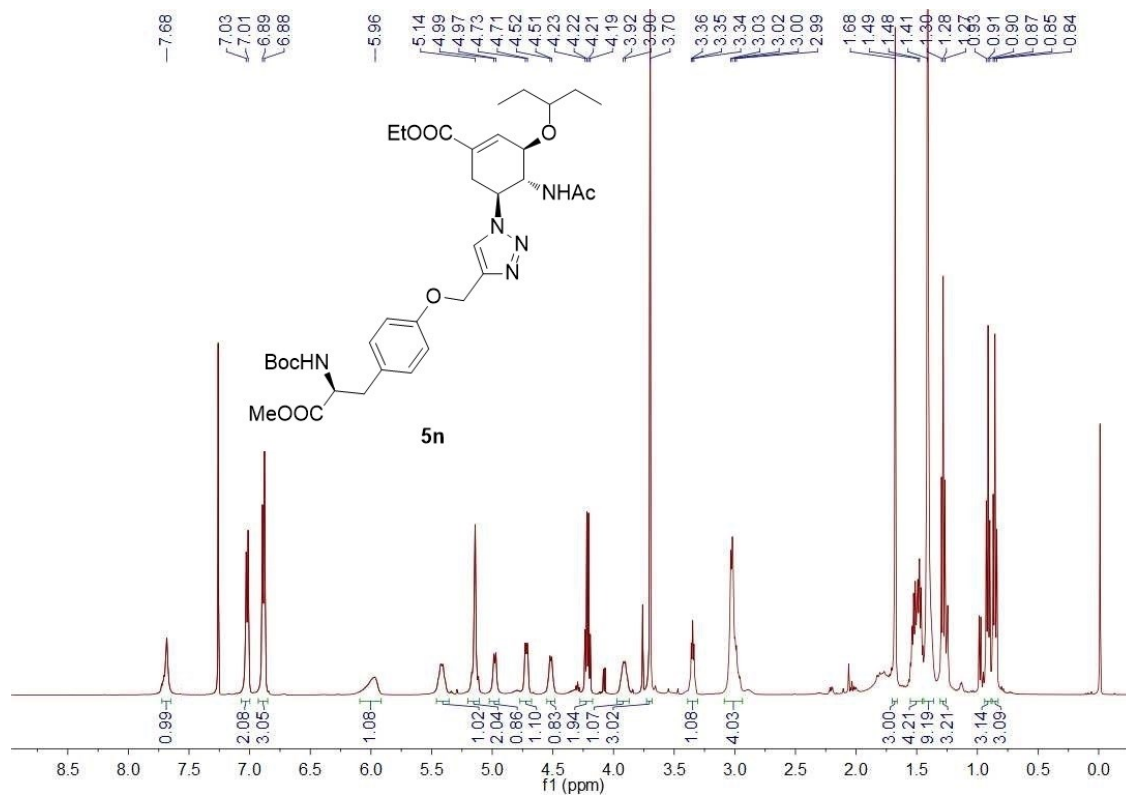

### HR-ESIMS of 5n

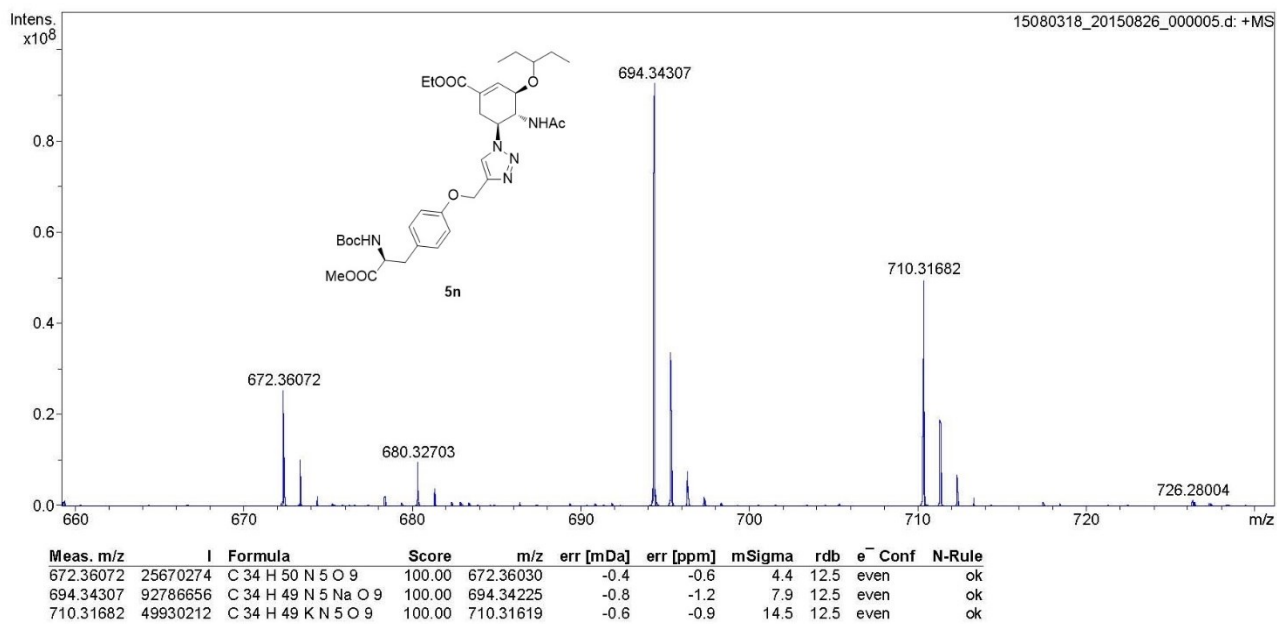

### <sup>1</sup>H NMR of 6e (500 MHz, CDCl<sub>3</sub>)

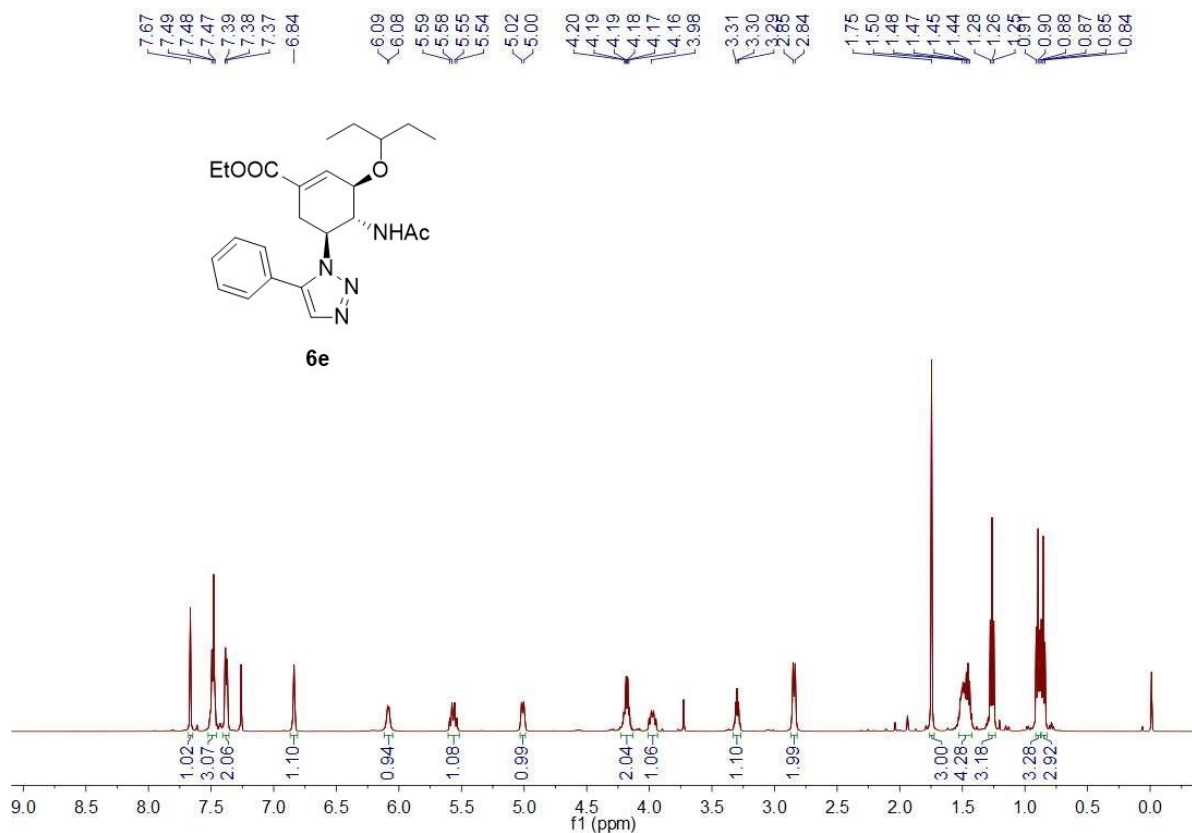

### HR-ESIMS of 6e

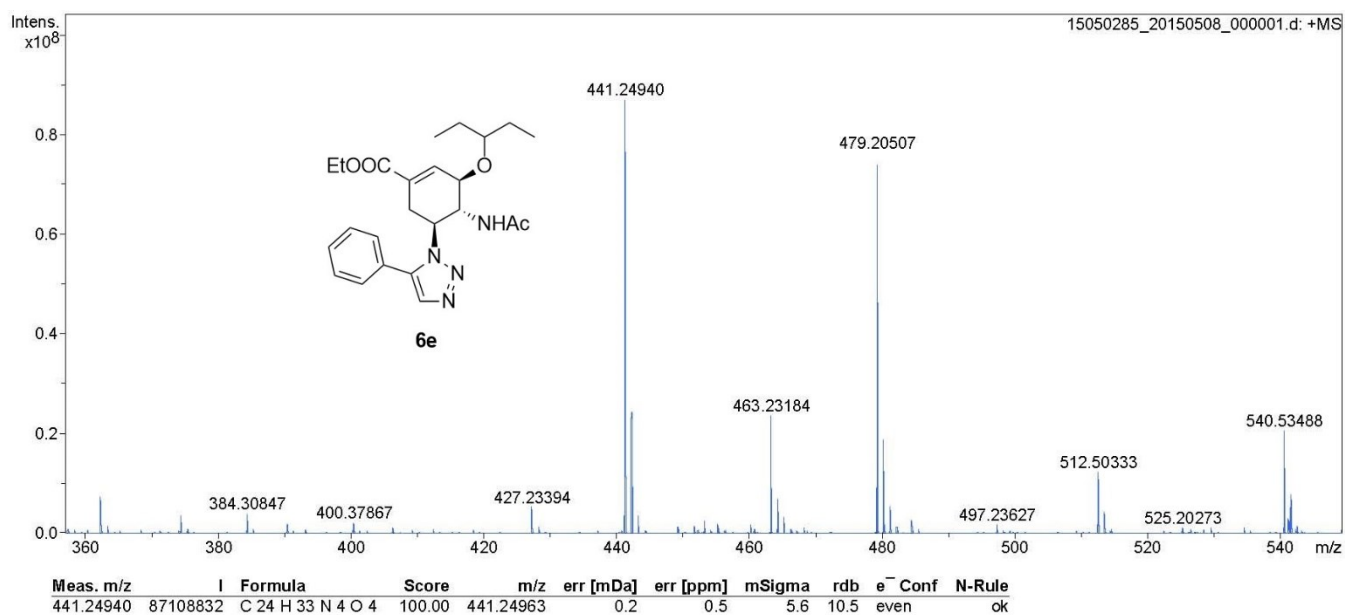

### <sup>1</sup>H NMR of 6f (500 MHz, CDCl<sub>3</sub>)

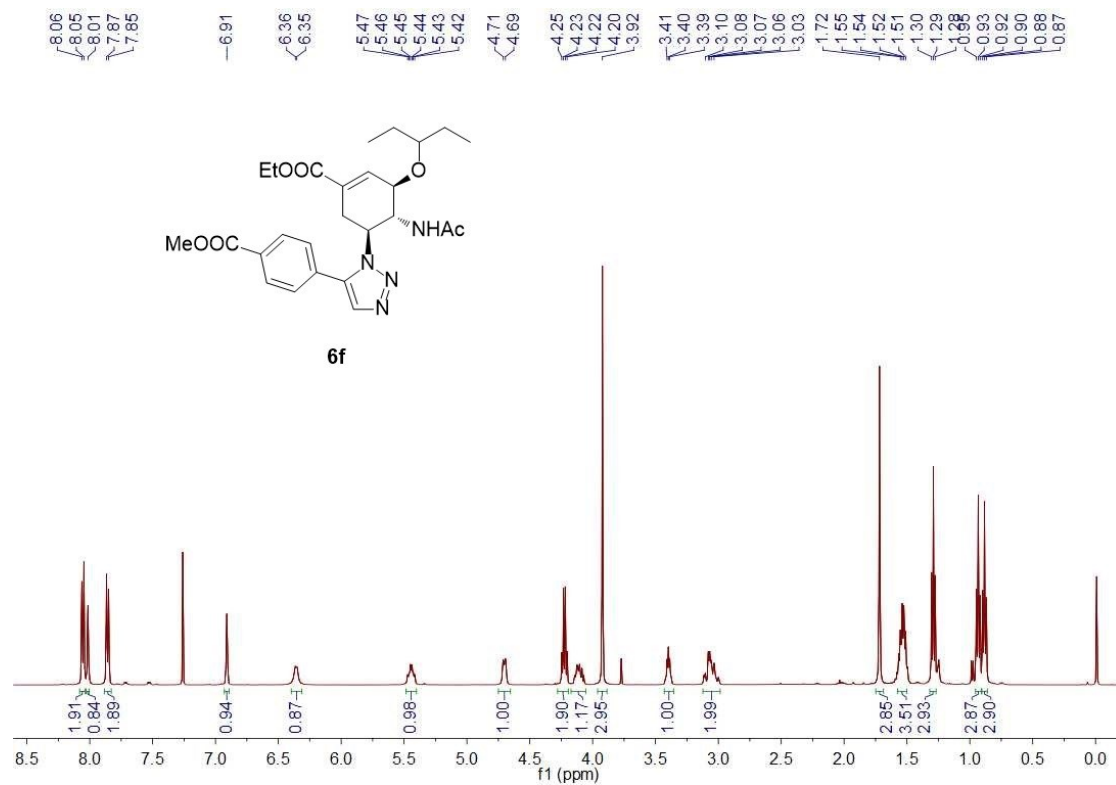

### HR-ESIMS of 6f

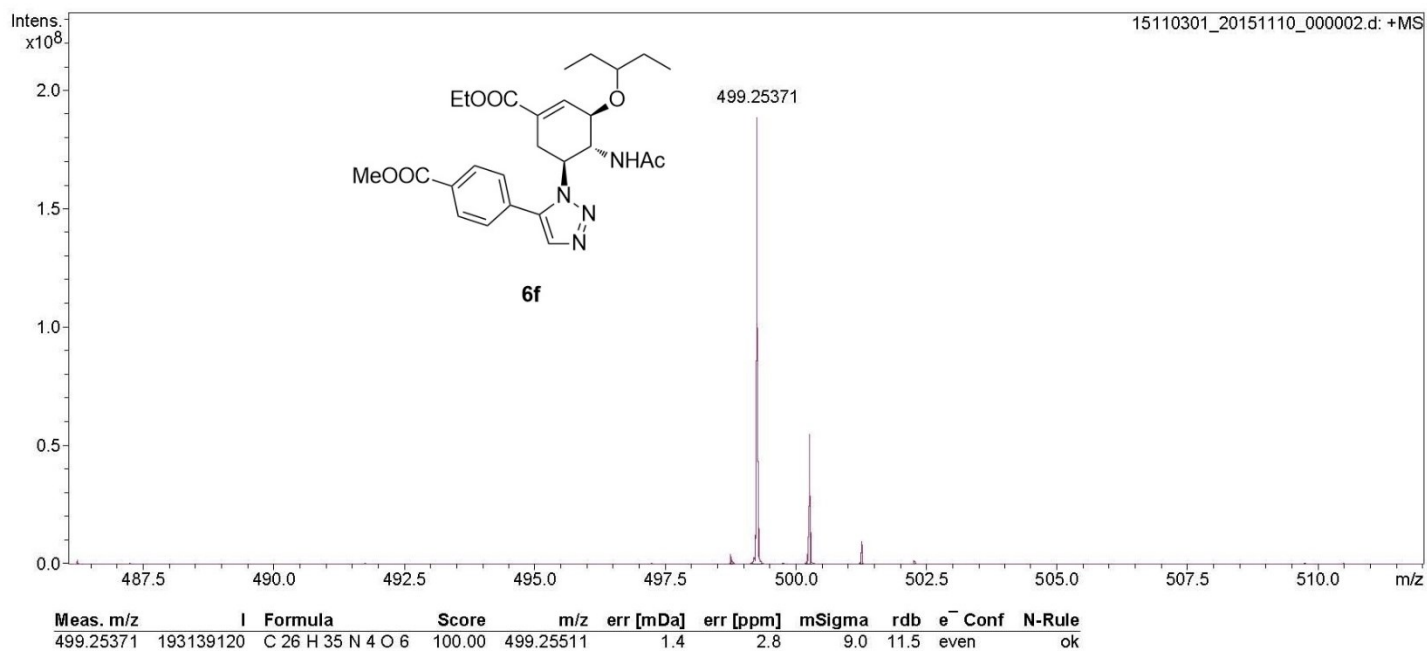

### <sup>1</sup>H NMR of 6g (500 MHz, CDCl<sub>3</sub>)

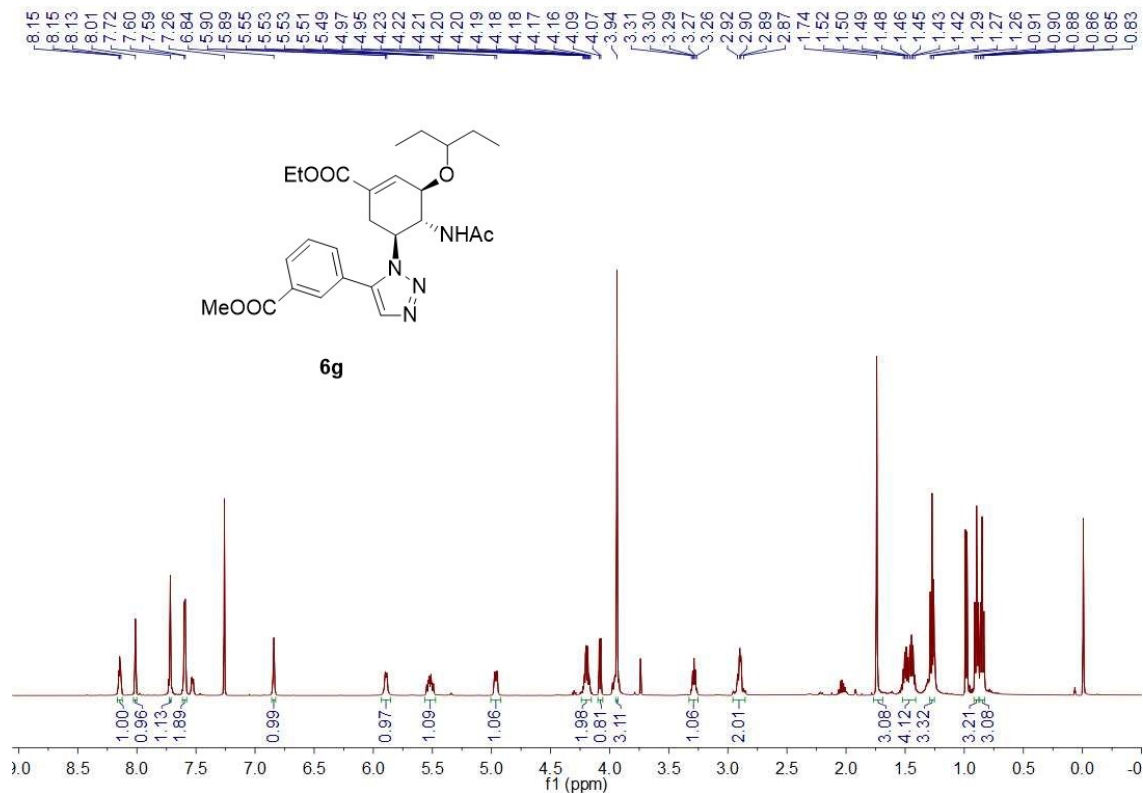

### HR-ESIMS of 6g

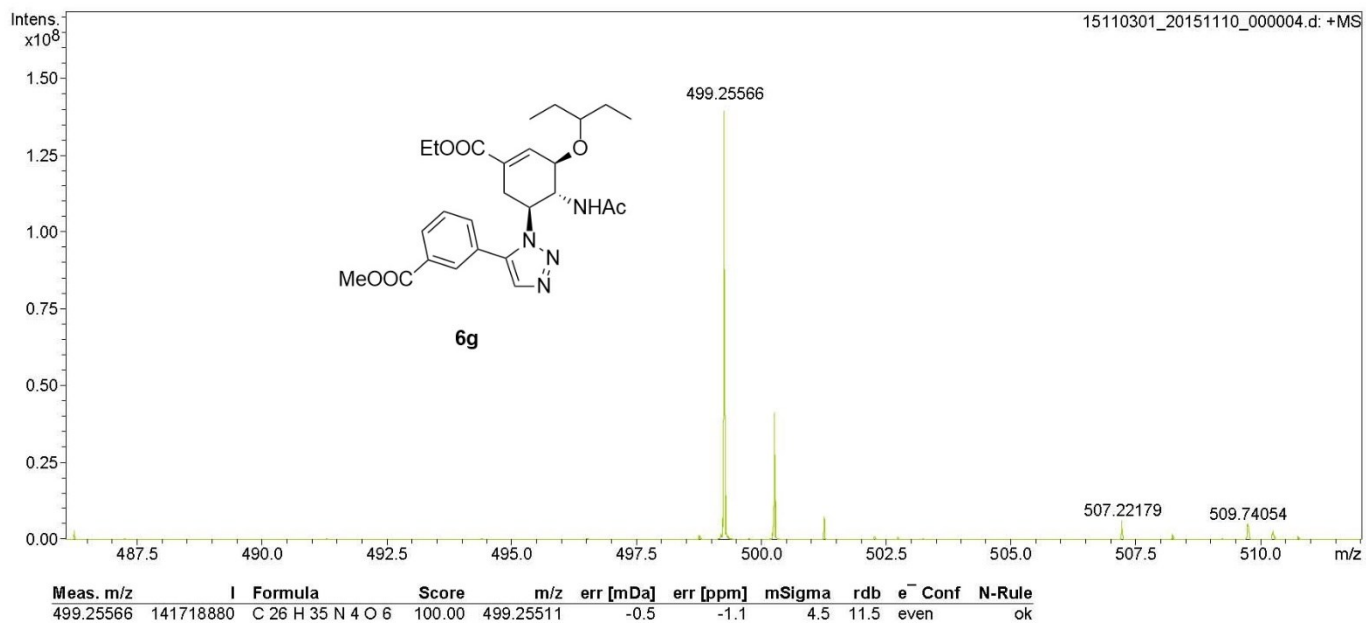

# <sup>1</sup>H NMR of 6h (500 MHz, CDCl<sub>3</sub>)

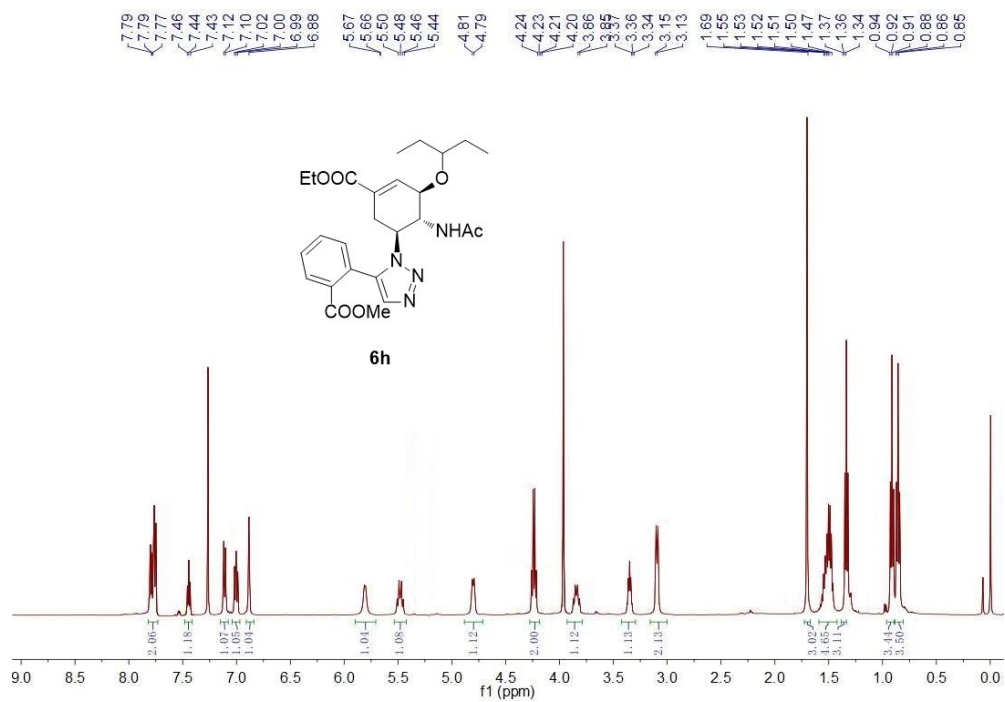

# HR-ESIMS of 6h

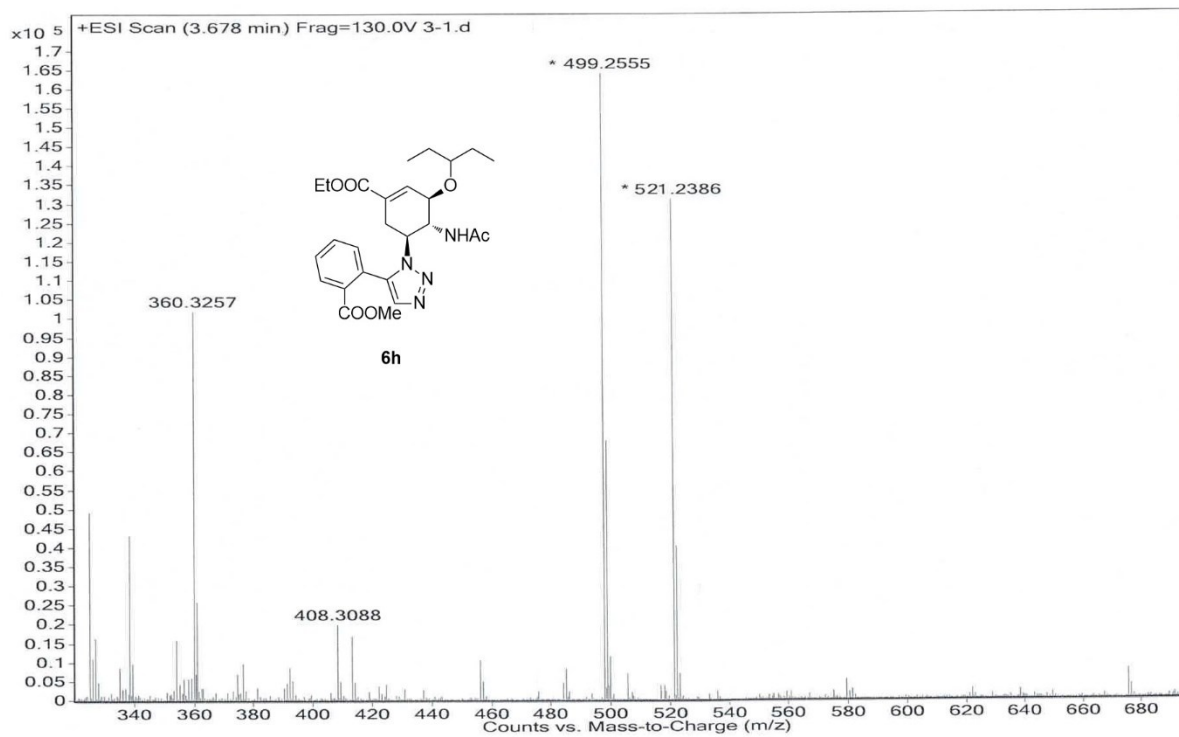



### $^1\text{H}$ NMR of **6i** (500 MHz, $\text{CDCl}_3$ )

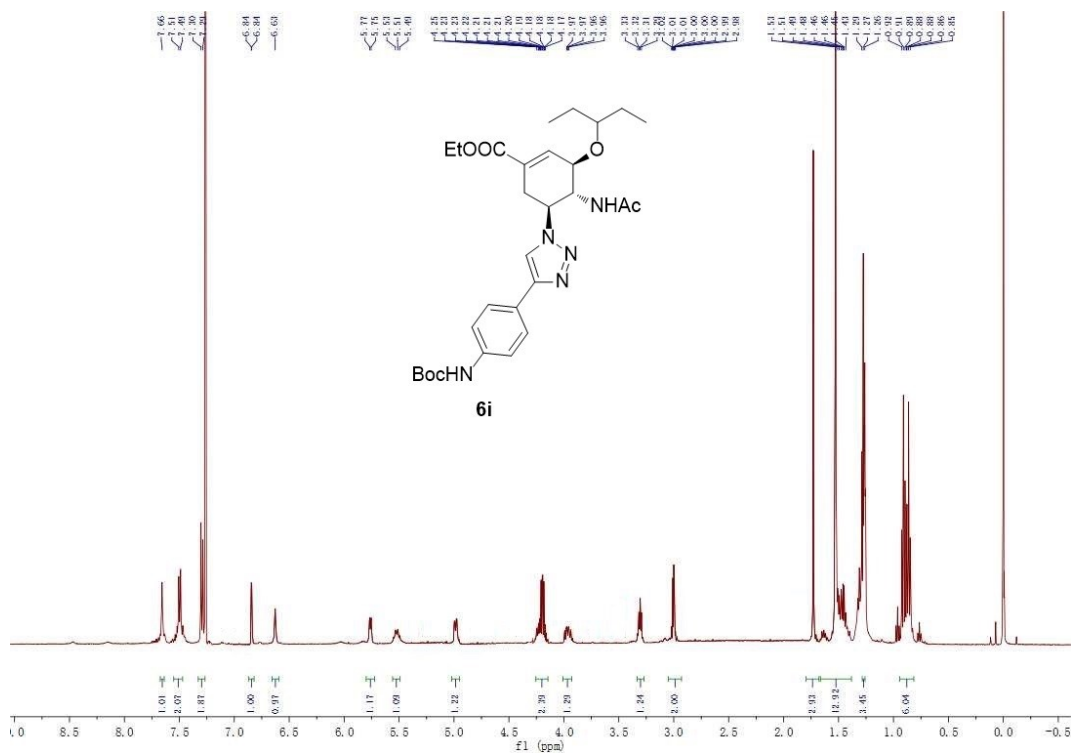

### ESIMS of **6i**

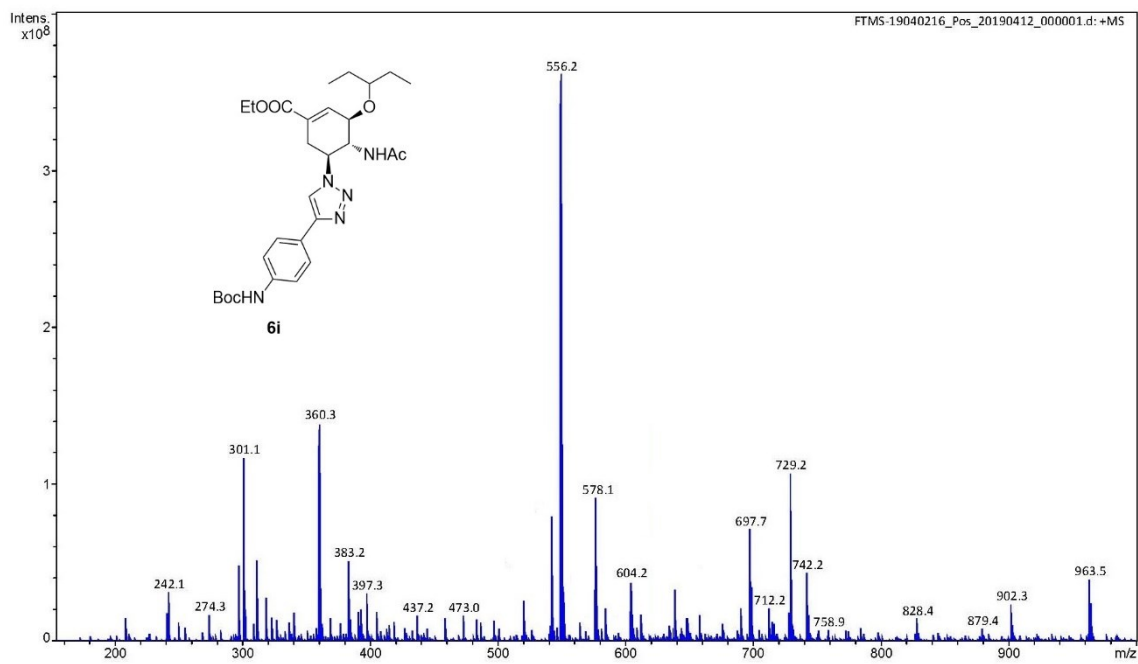

### <sup>1</sup>H NMR of 6j (500 MHz, CDCl<sub>3</sub>)

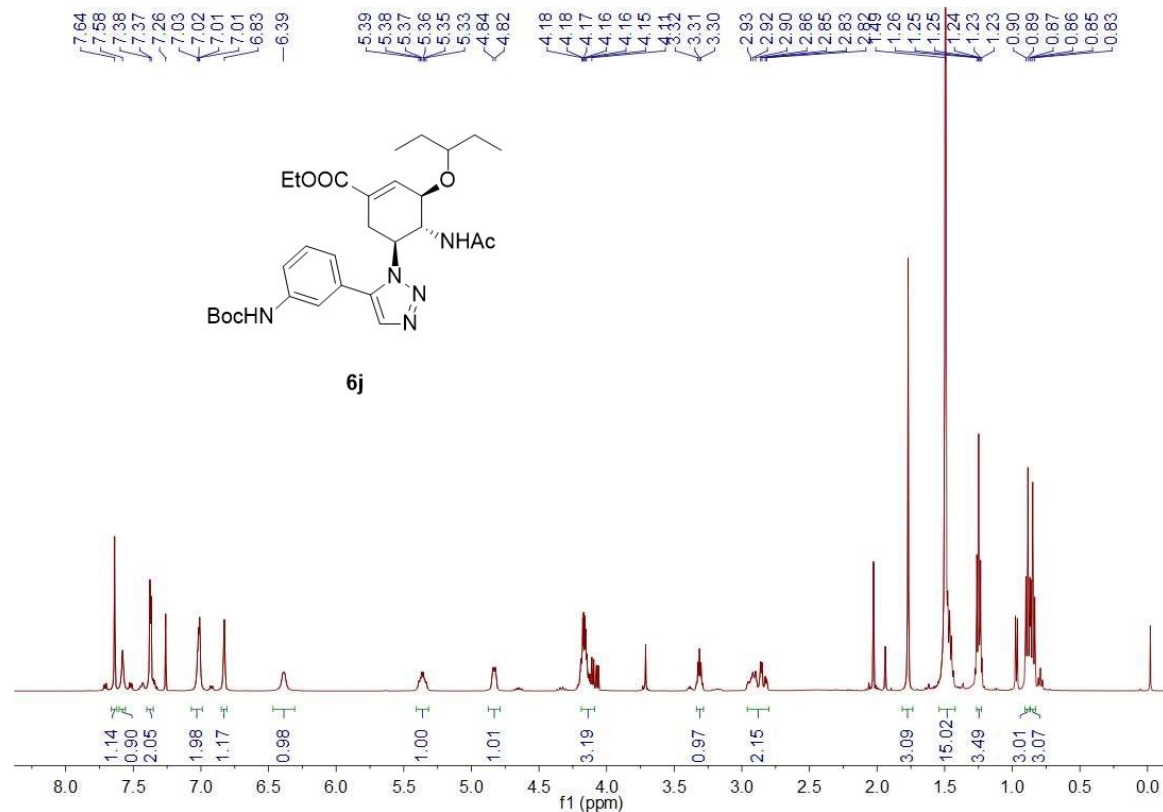

### HR-ESIMS of 6j

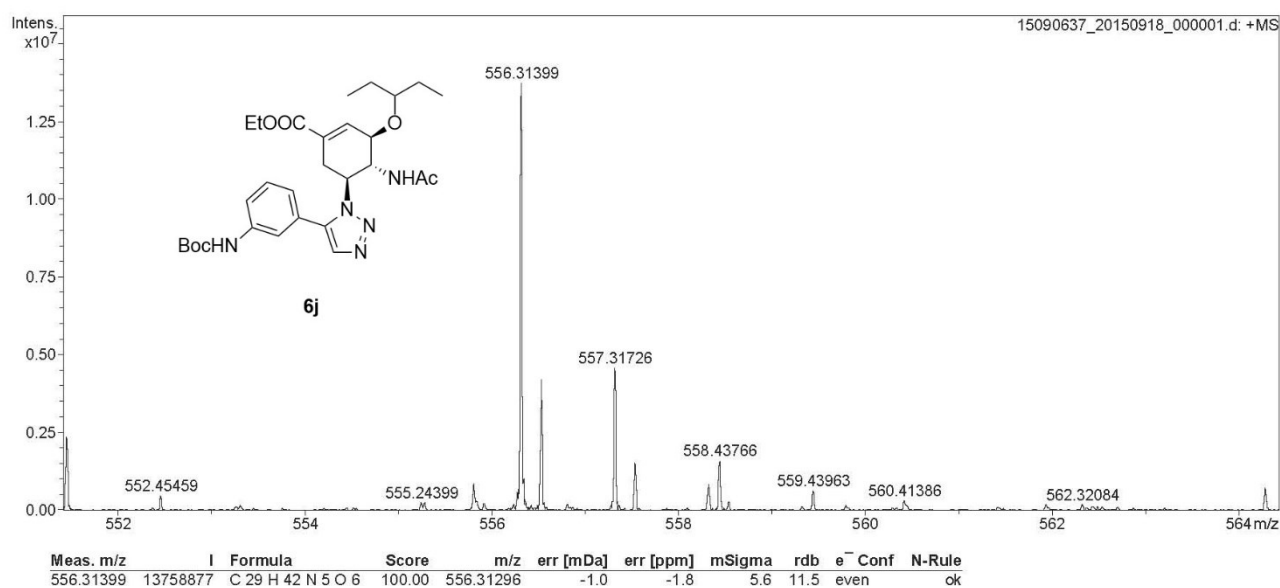

### $^1\text{H}$ NMR of 6k (500 MHz, $\text{CDCl}_3$ )

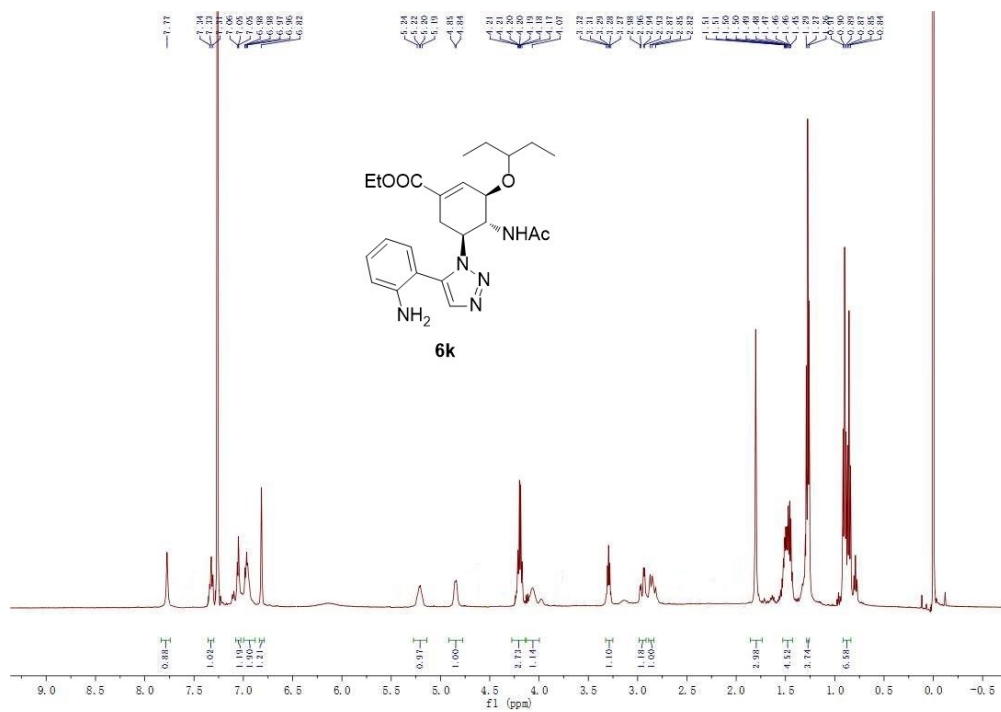

### HR-ESIMS of 6k

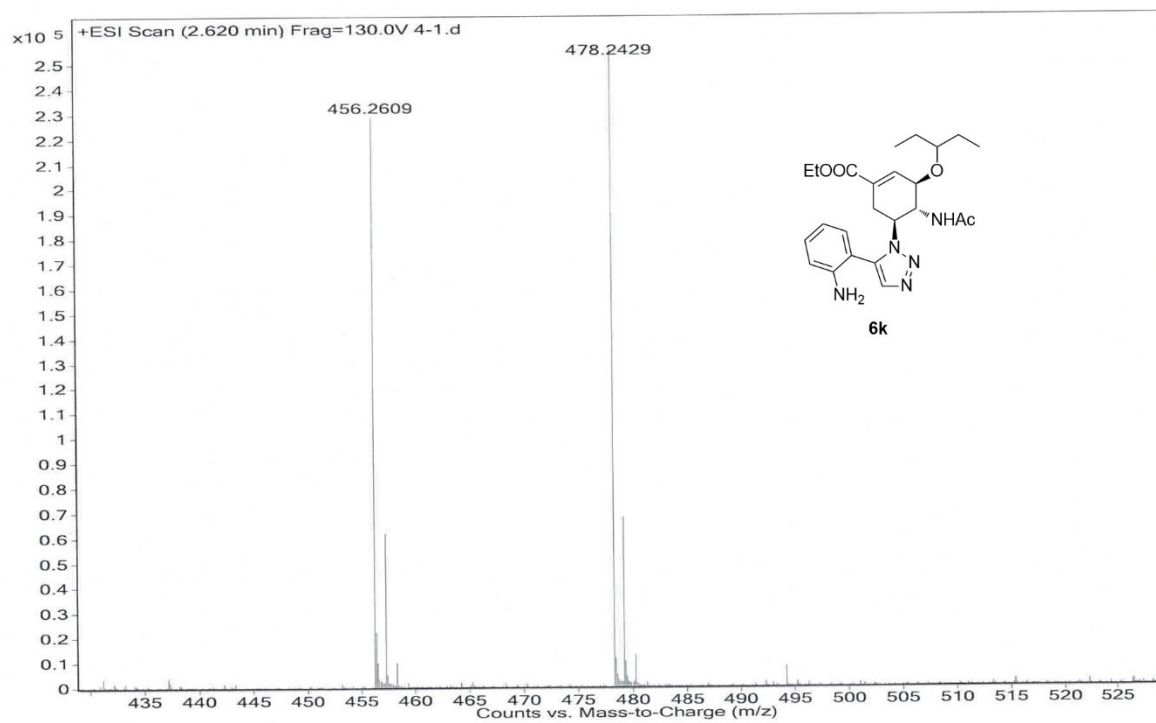

# <sup>1</sup>H NMR of 6l (500 MHz, CDCl<sub>3</sub>)

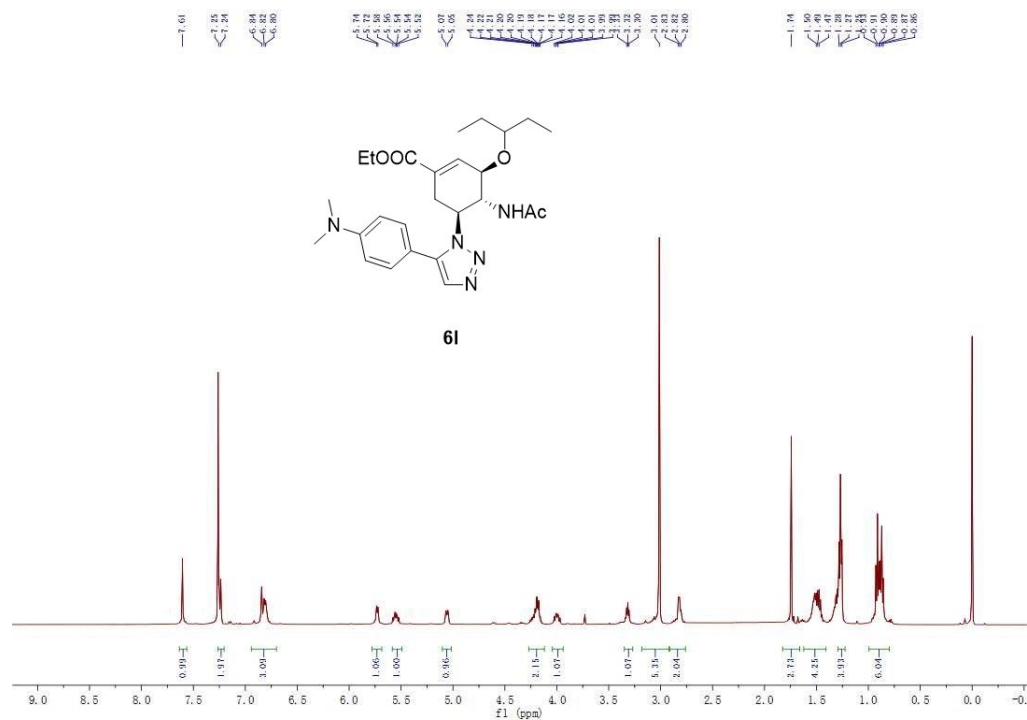

# ESIMS of 6l

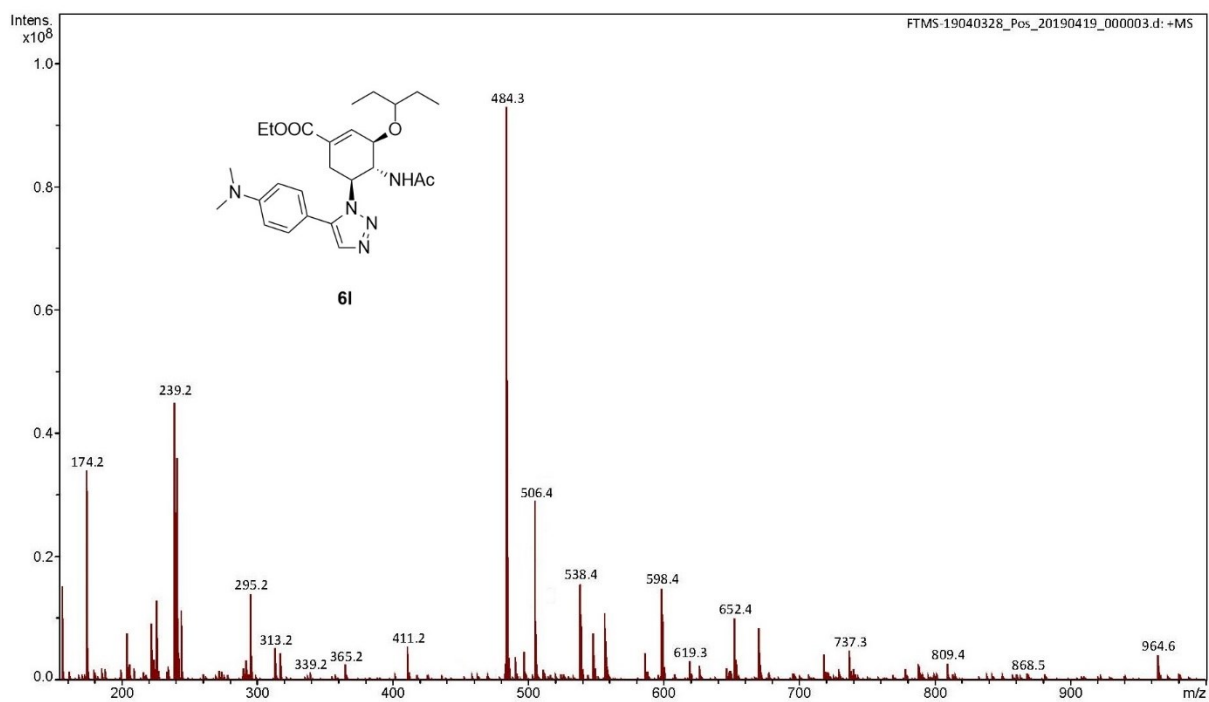

# <sup>1</sup>H NMR of 6m (500 MHz, CDCl<sub>3</sub>)

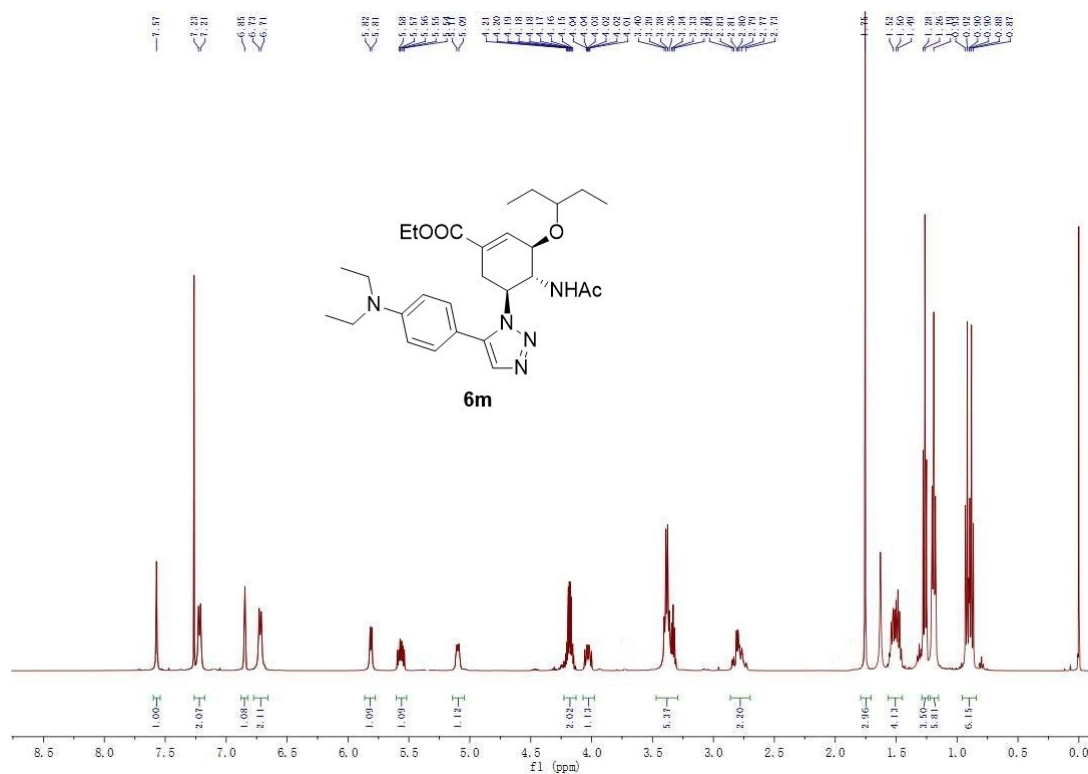

# ESIMS of 6m

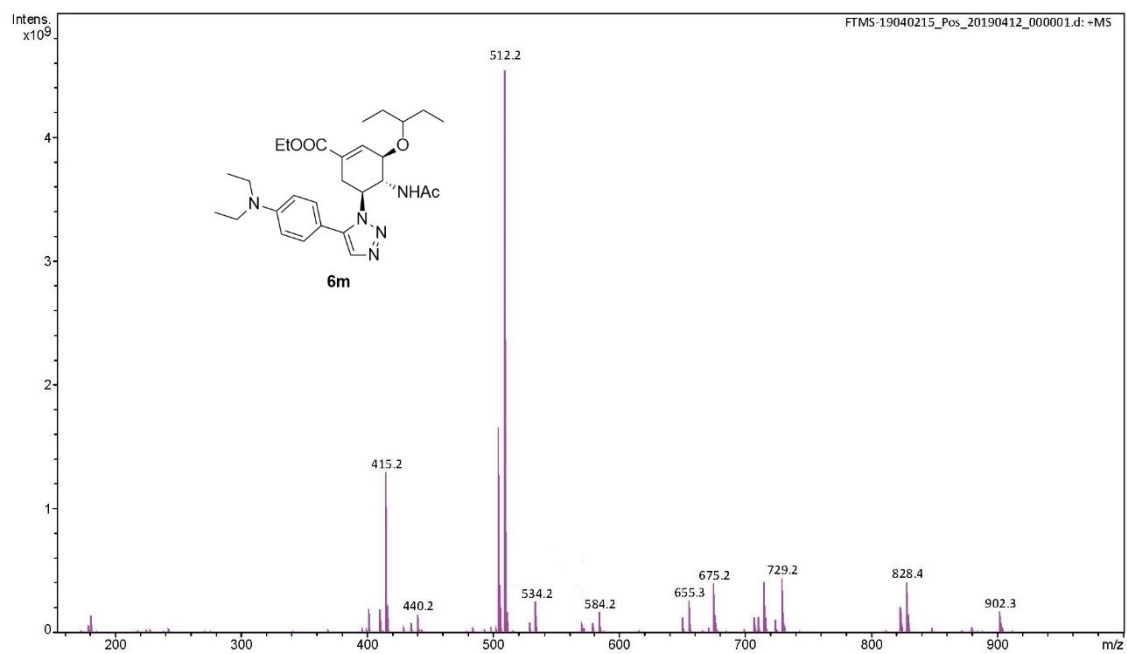

### <sup>1</sup>H NMR of 6n (500 MHz, CDCl<sub>3</sub>)

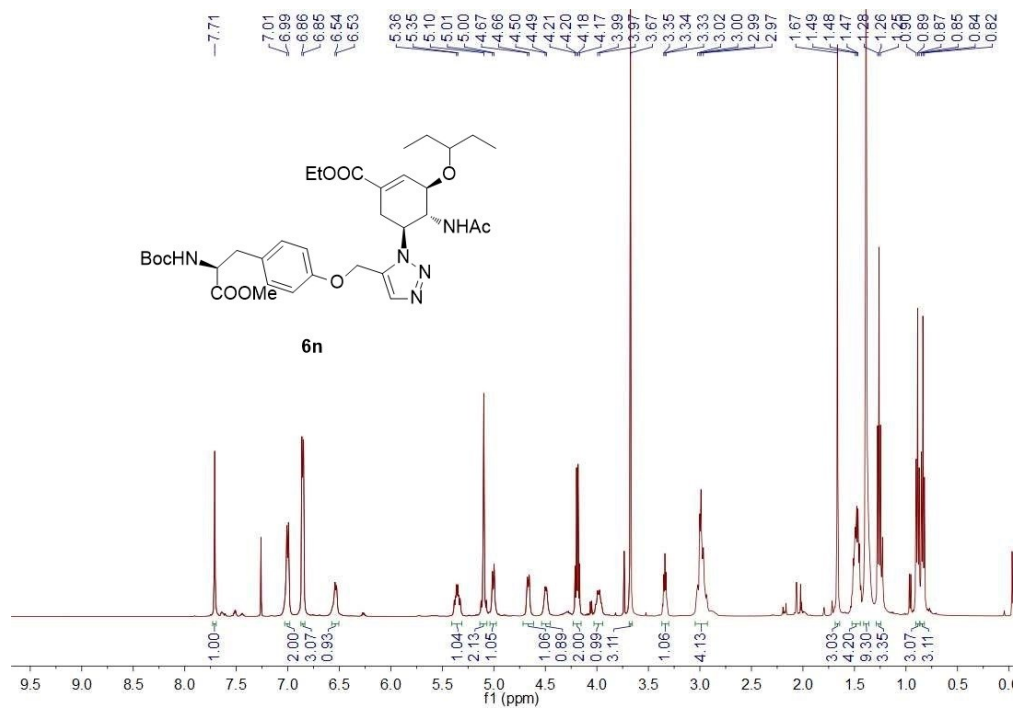

### HR-ESIMS of 6n

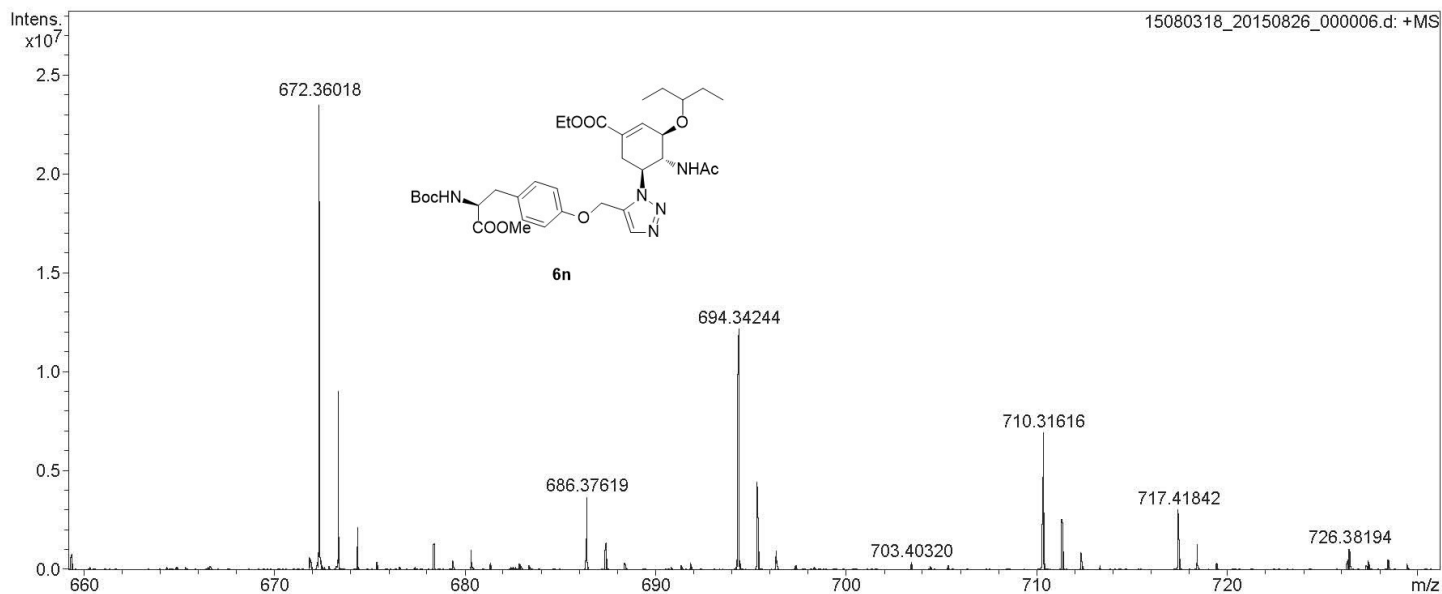

| Meas. m/z | I        | Formula                                                         | Score  | m/z       | err [mDa] | err [ppm] | mSigma | rdb  | e <sup>-</sup> Conf | N-Rule |
|-----------|----------|-----------------------------------------------------------------|--------|-----------|-----------|-----------|--------|------|---------------------|--------|
| 672.36018 | 23743106 | C <sub>34</sub> H <sub>50</sub> N <sub>5</sub> O <sub>9</sub>   | 100.00 | 672.36030 | 0.1       | 0.2       | 6.3    | 12.5 | even                | ok     |
| 694.34244 | 12200879 | C <sub>34</sub> H <sub>49</sub> N <sub>5</sub> NaO <sub>9</sub> | 100.00 | 694.34225 | -0.2      | -0.3      | 10.7   | 12.5 | even                | ok     |
| 710.31616 | 6986031  | C <sub>34</sub> H <sub>49</sub> KN <sub>5</sub> O <sub>9</sub>  | 100.00 | 710.31619 | 0.0       | 0.0       | 19.1   | 12.5 | even                | ok     |

### <sup>1</sup>H NMR of 1a (500 MHz, CD<sub>3</sub>OD)

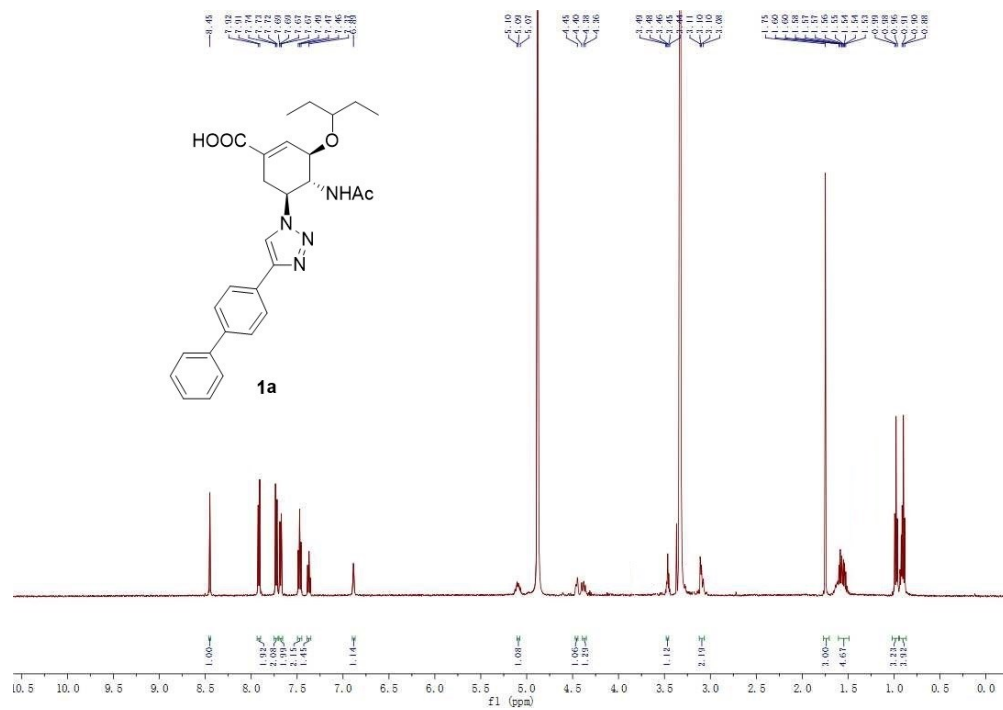

### <sup>13</sup>C NMR of 1a (500 MHz, CD<sub>3</sub>OD)

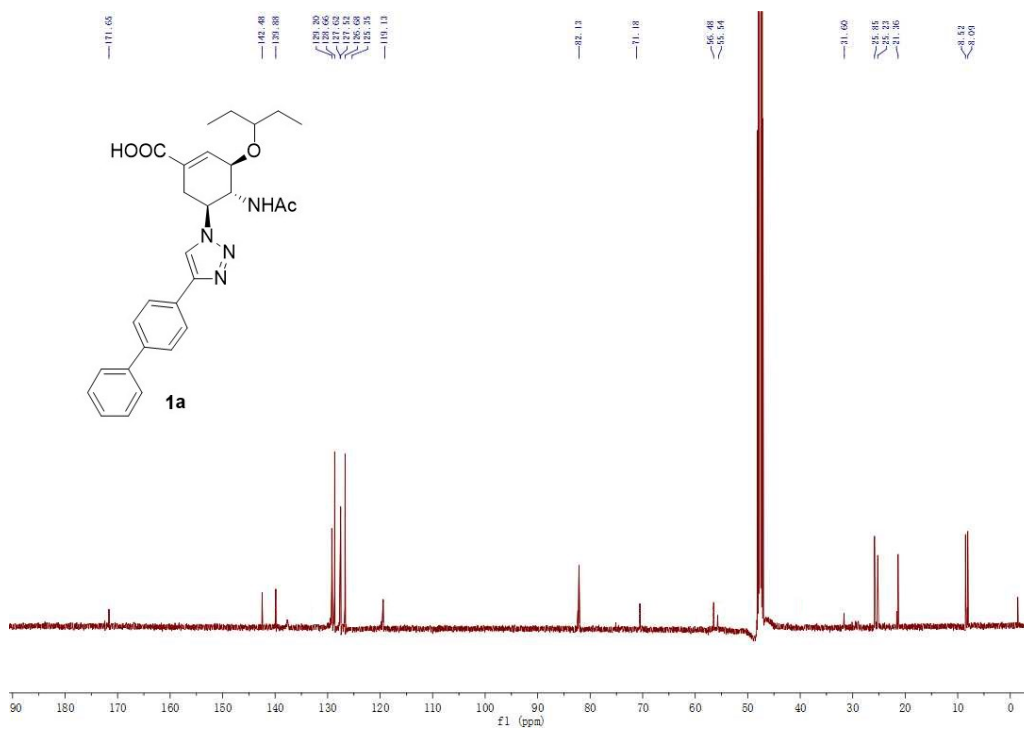

## HR-ESIMS of 1a

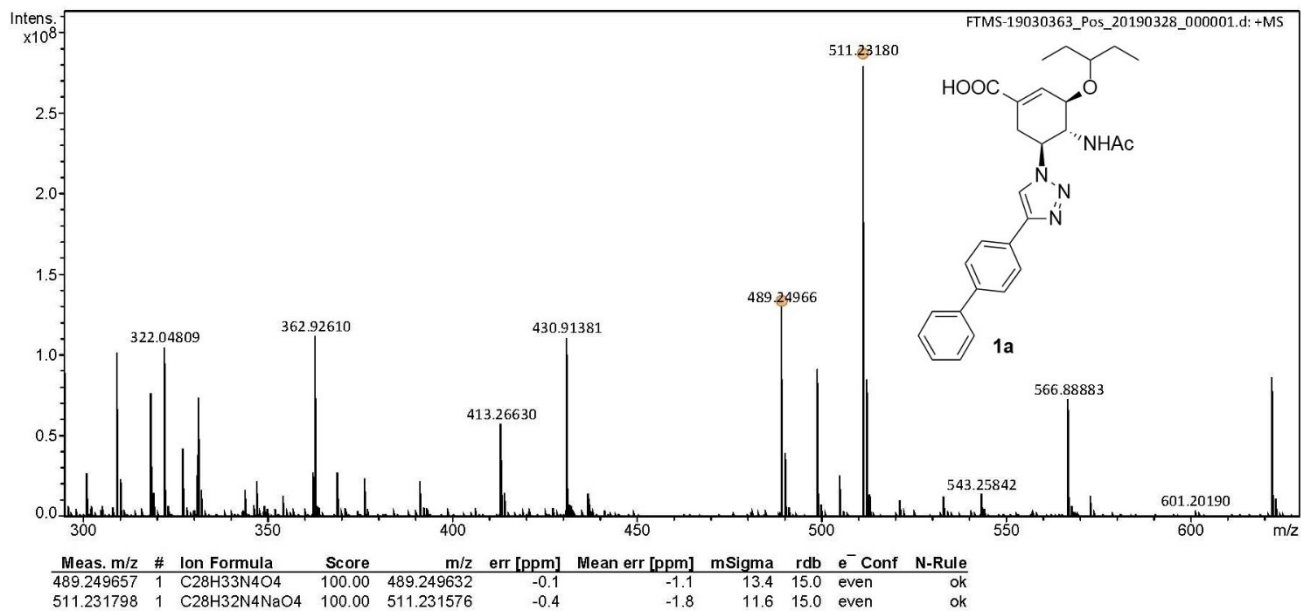

## IR of 1a

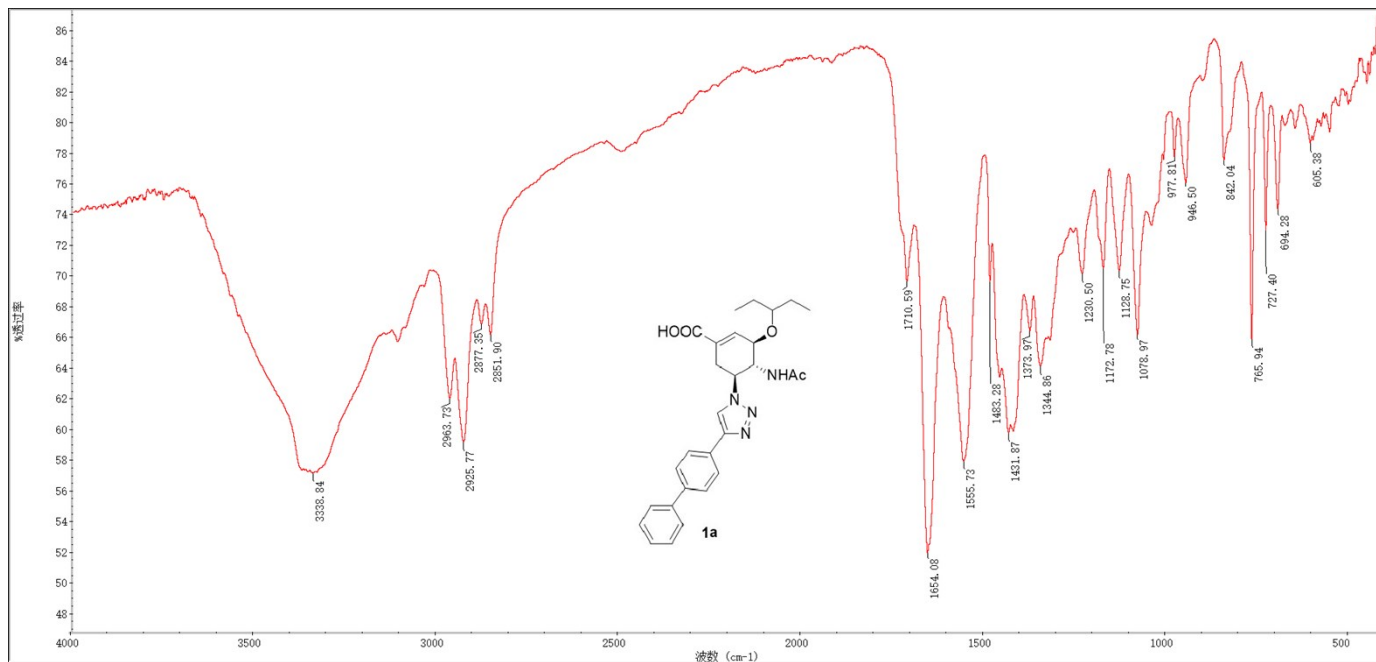



### $^1\text{H}$ NMR of 1b (500 MHz, $\text{CD}_3\text{OD}$ )

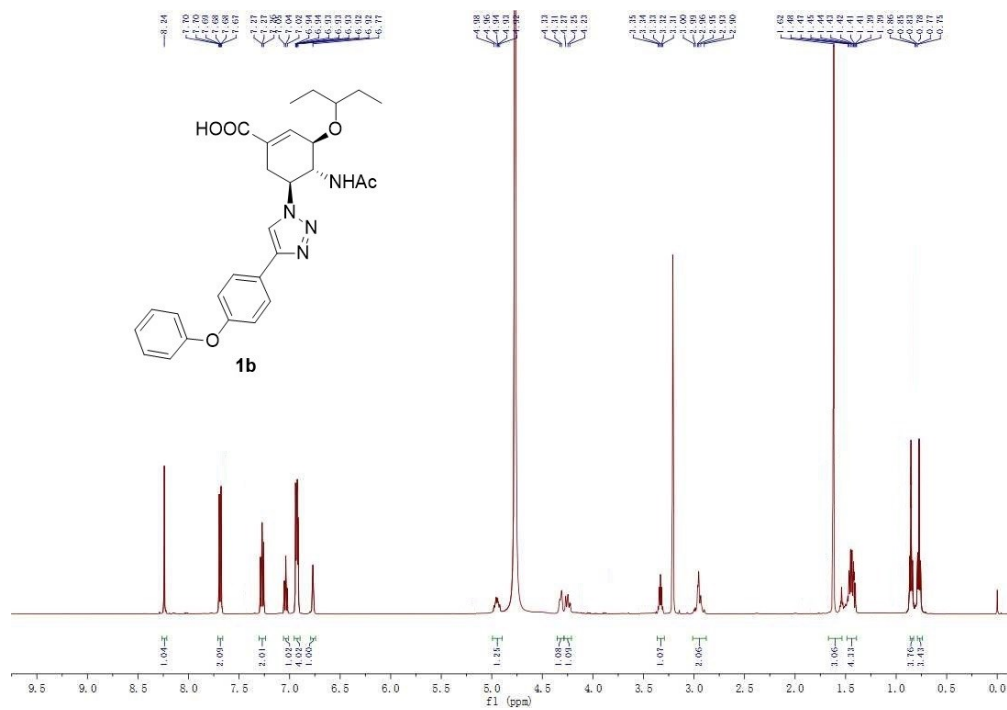

### $^{13}\text{C}$ NMR of 1b (500 MHz, $\text{CD}_3\text{OD}$ )

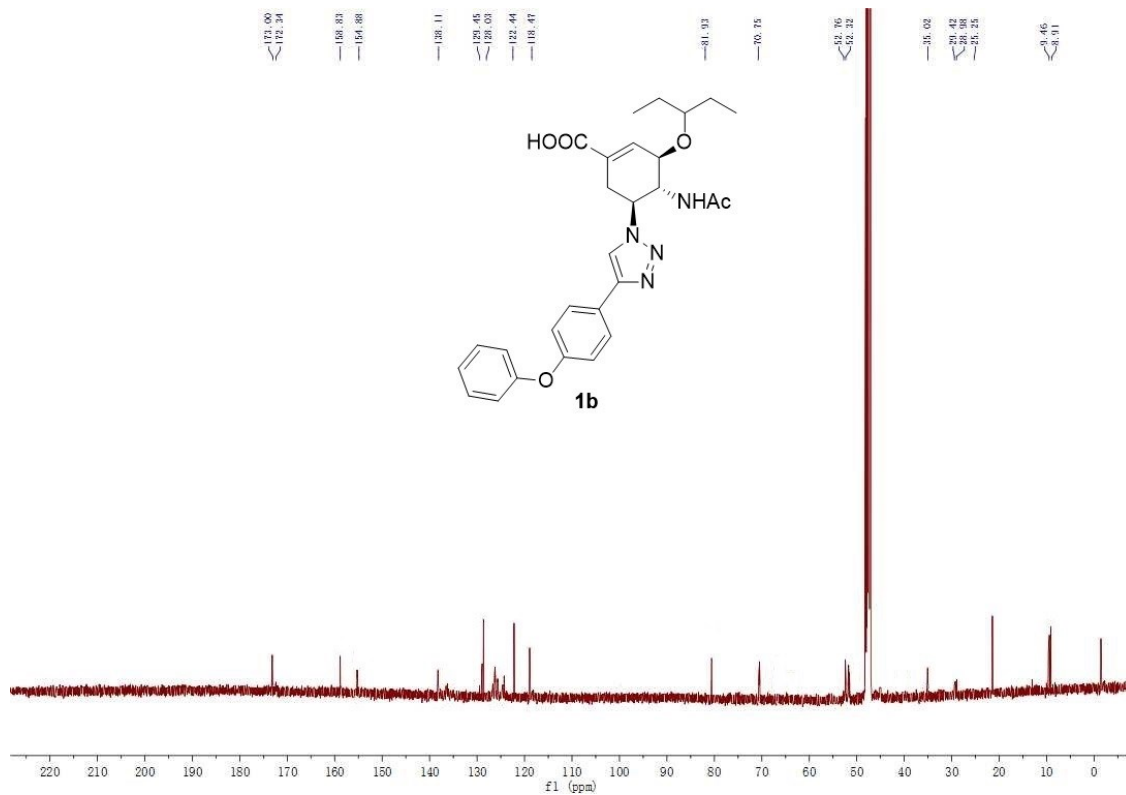

## HR-ESIMS of 1b

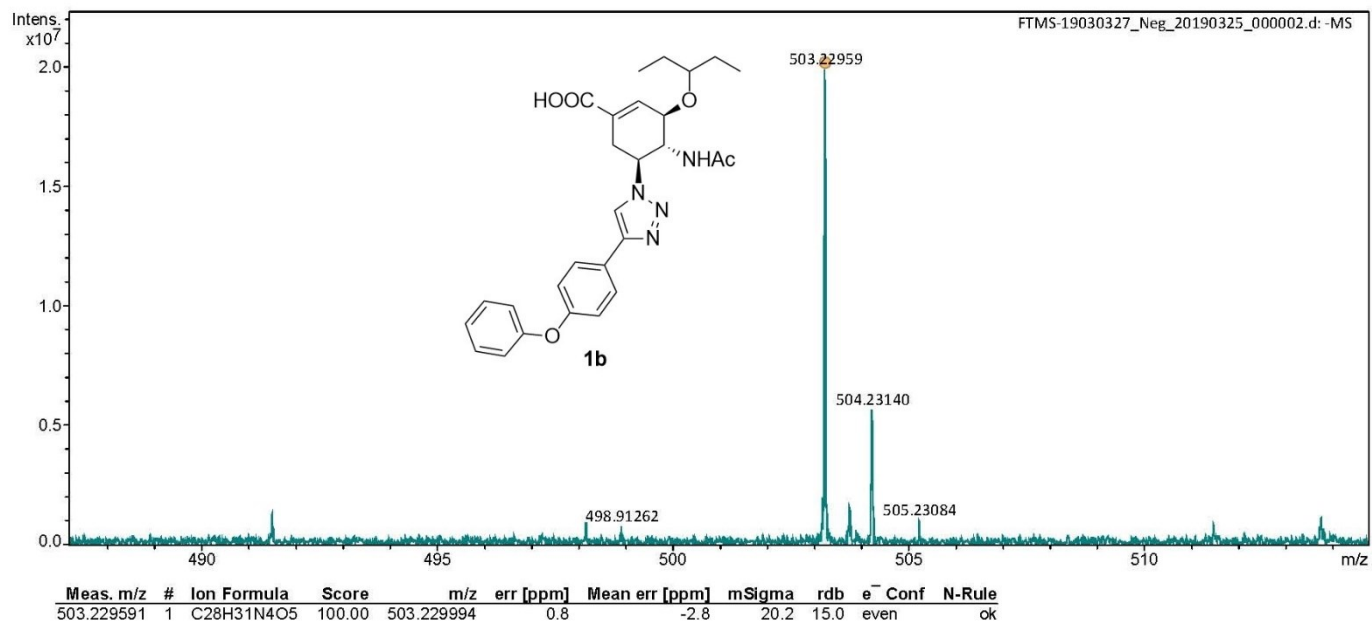

## IR of 1b

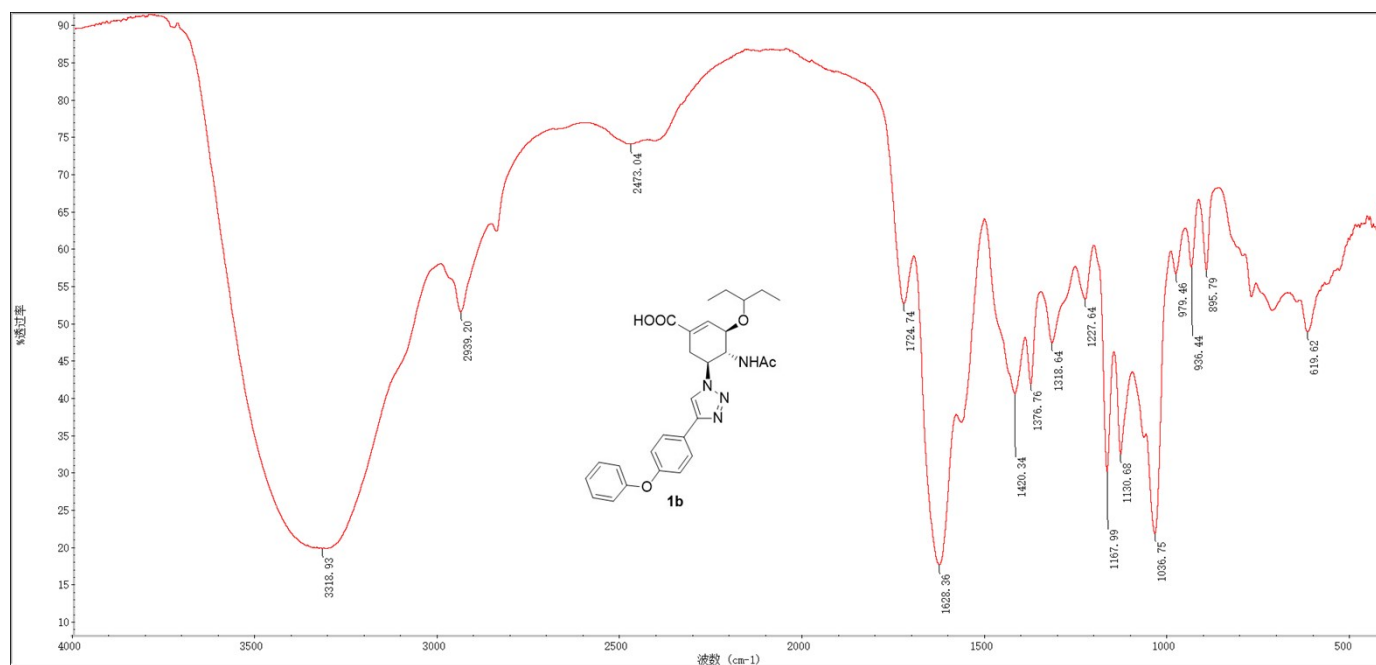

### <sup>1</sup>H NMR of 1c (500 MHz, CD<sub>3</sub>OD)

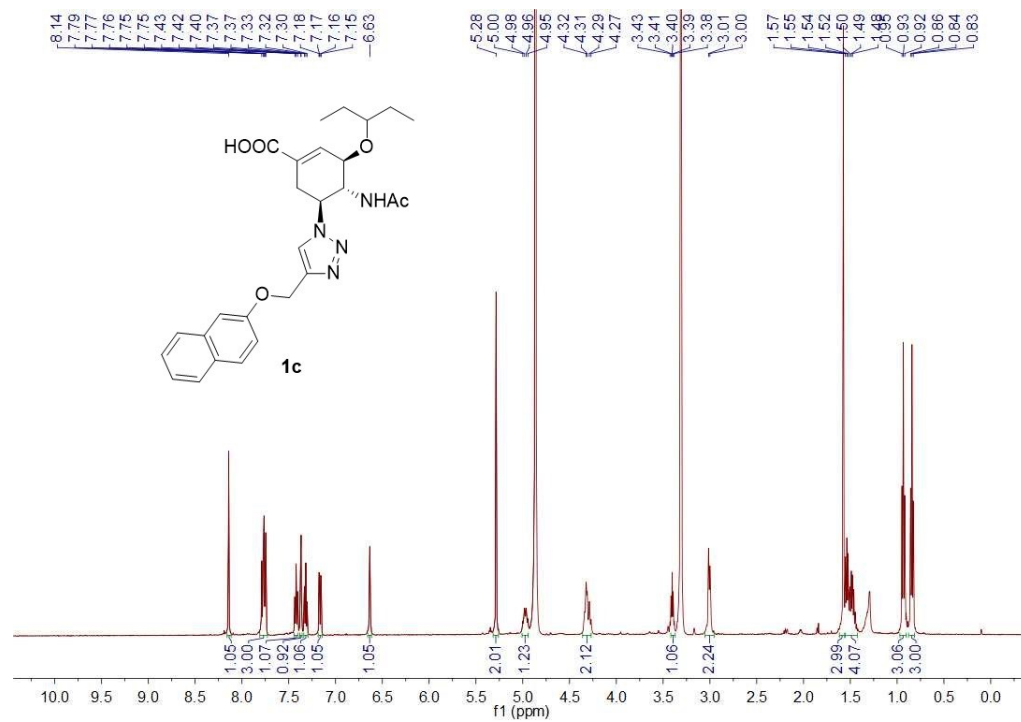

### <sup>13</sup>C NMR of 1c (500 MHz, CD<sub>3</sub>OD)

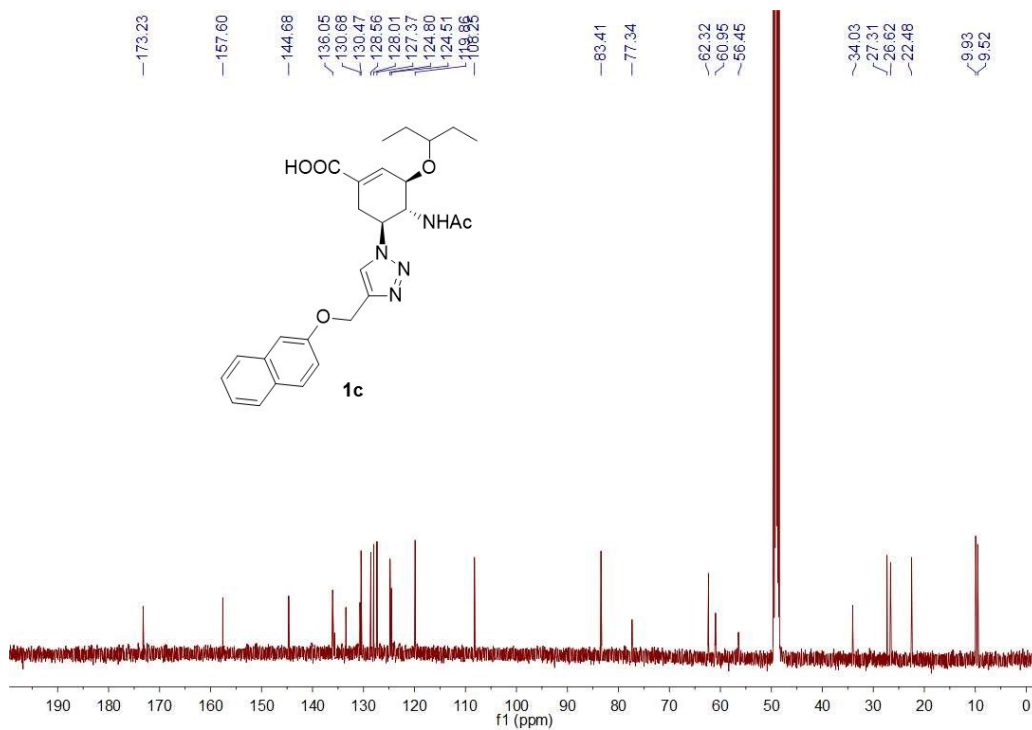

## HR-ESIMS of 1c

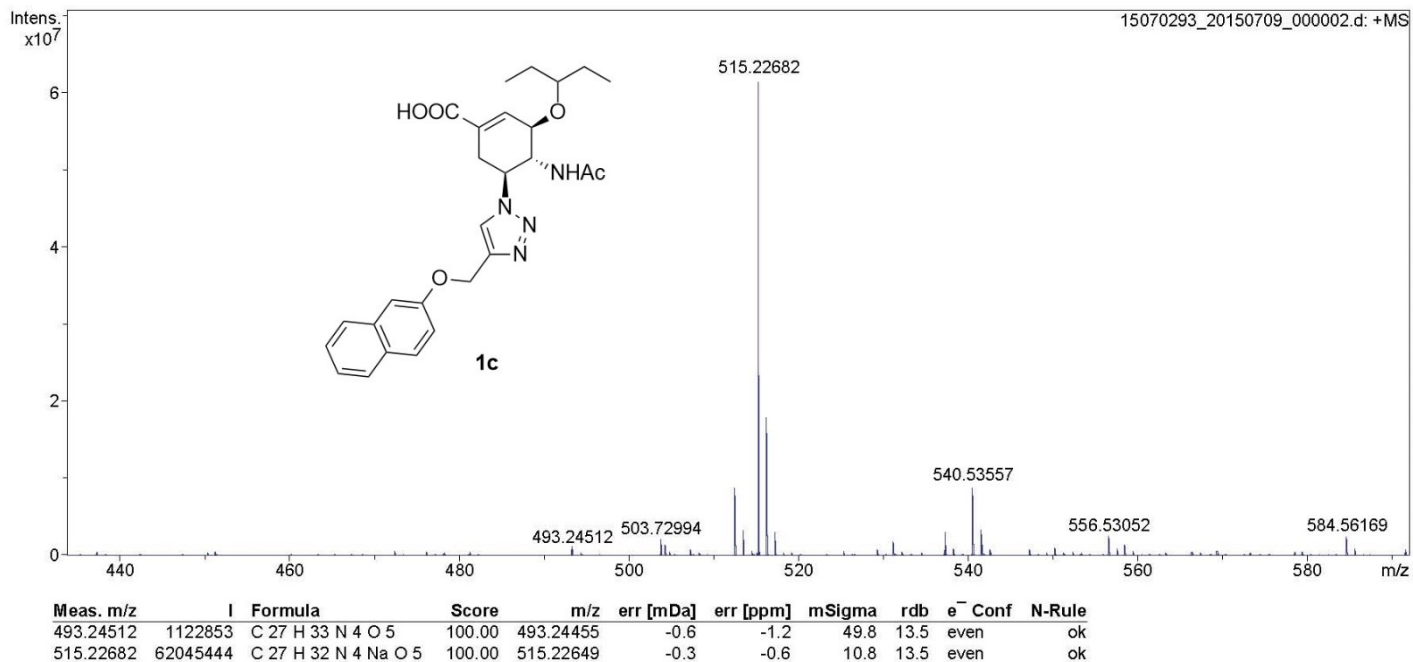

## IR of 1c

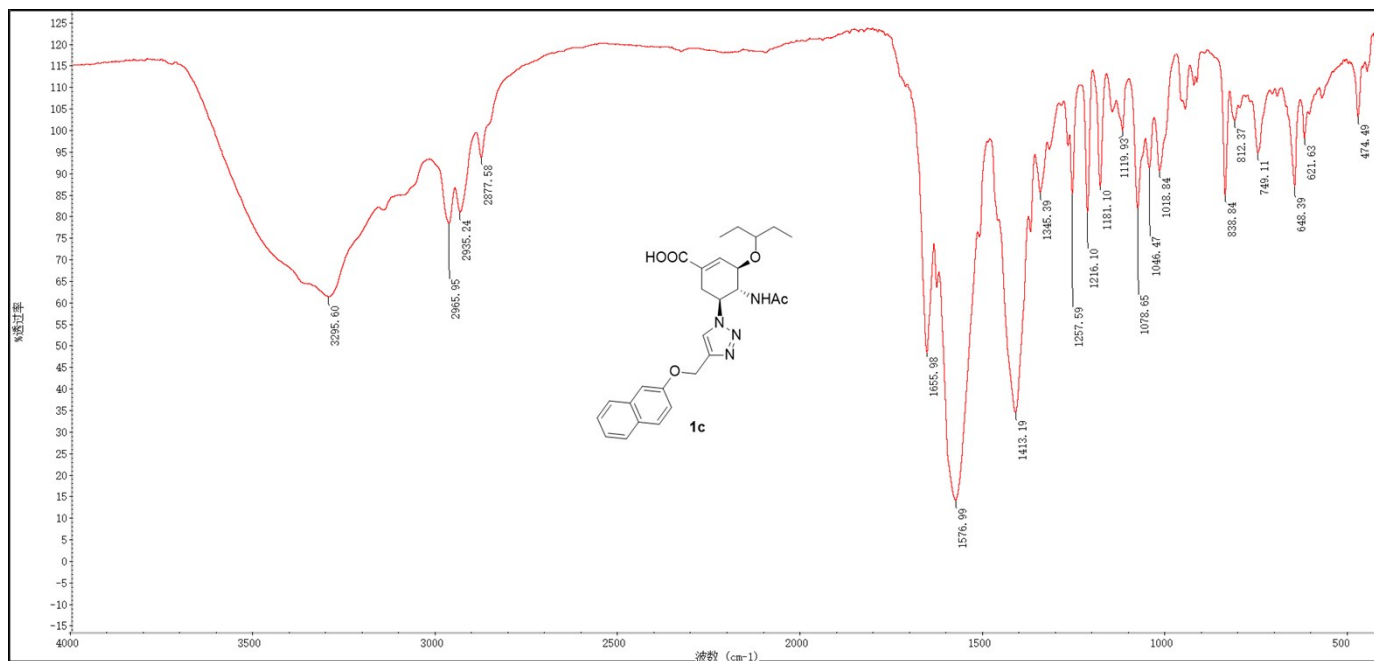

### $^1\text{H}$ NMR of 1d (500 MHz, $\text{CD}_3\text{OD}$ )

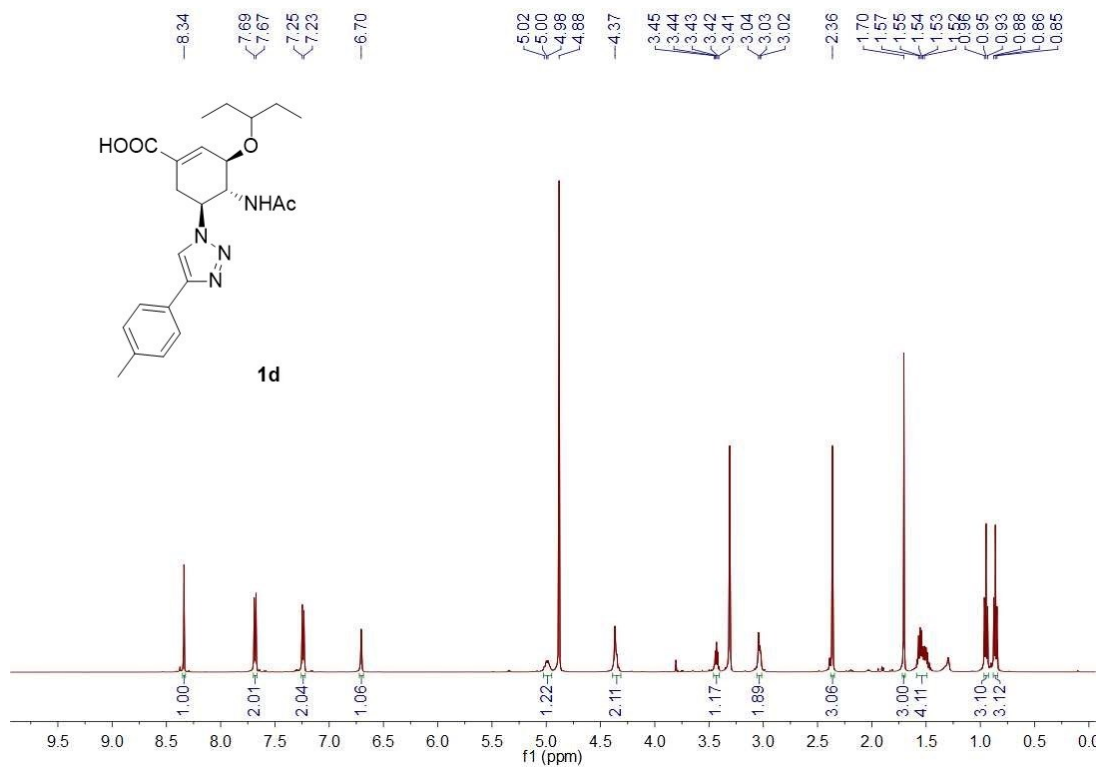

### $^{13}\text{C}$ NMR of 1d (500 MHz, $\text{CD}_3\text{OD}$ )

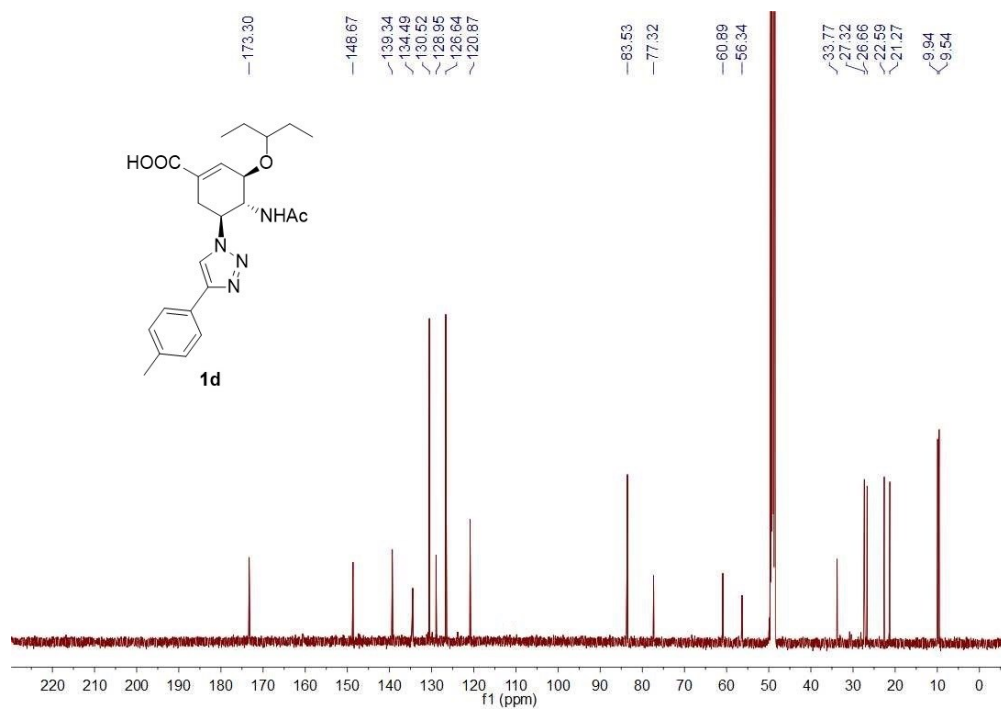

## HR-ESIMS of 1d

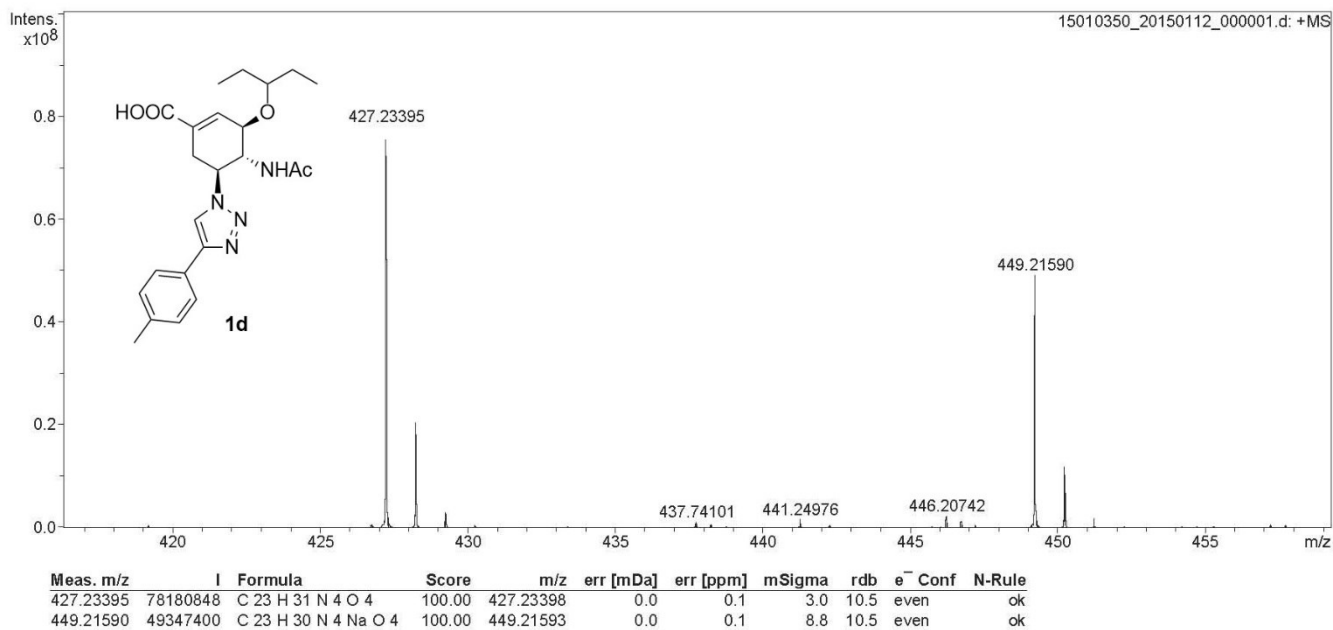

## IR of 1d

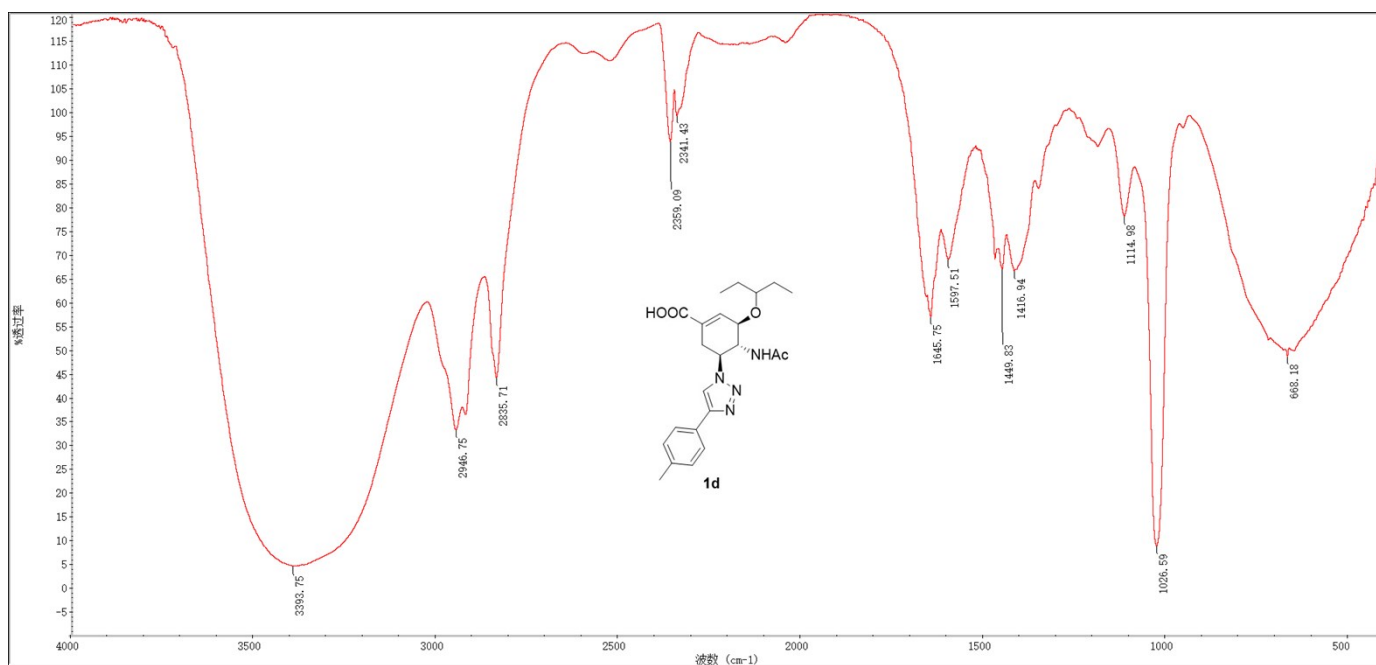

### $^1\text{H}$ NMR of **1e** (500 MHz, $\text{CD}_3\text{OD}$ )

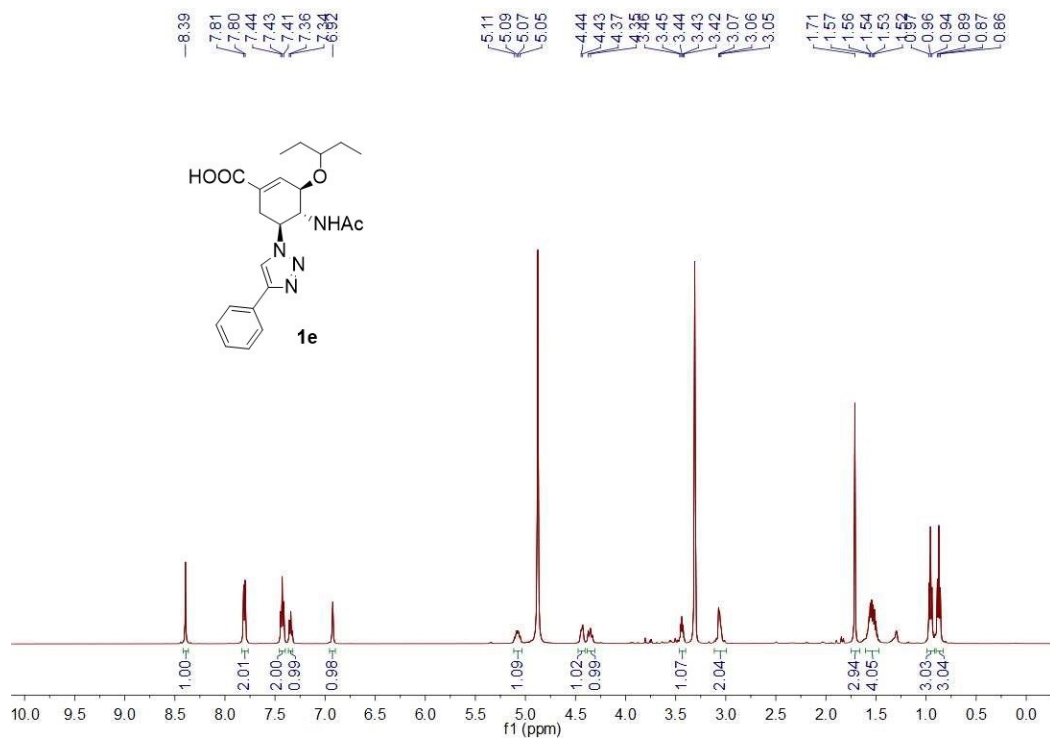

### $^{13}\text{C}$ NMR of **1e** (500 MHz, $\text{CD}_3\text{OD}$ )

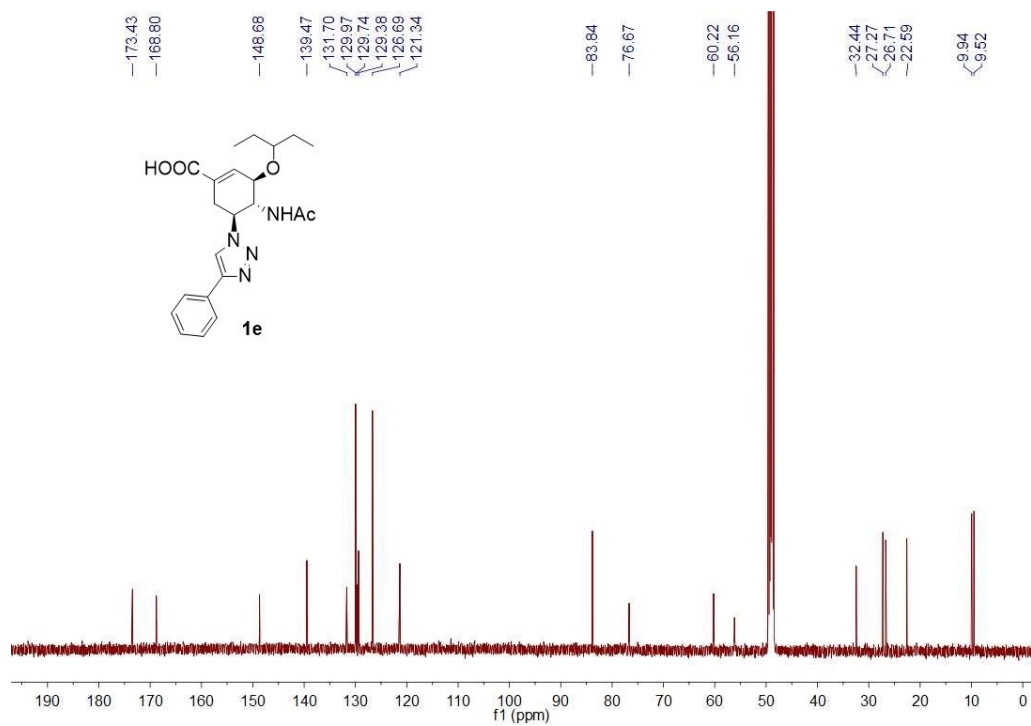

## HR-ESIMS of 1e

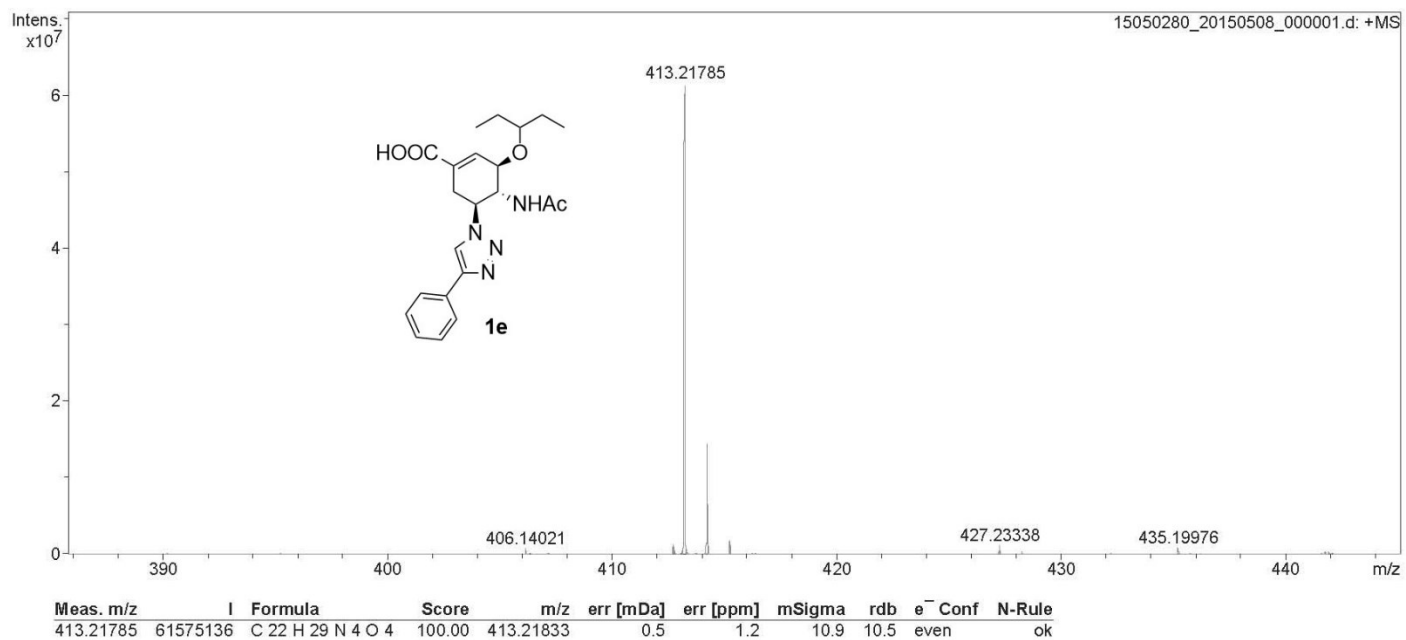

## IR of 1e

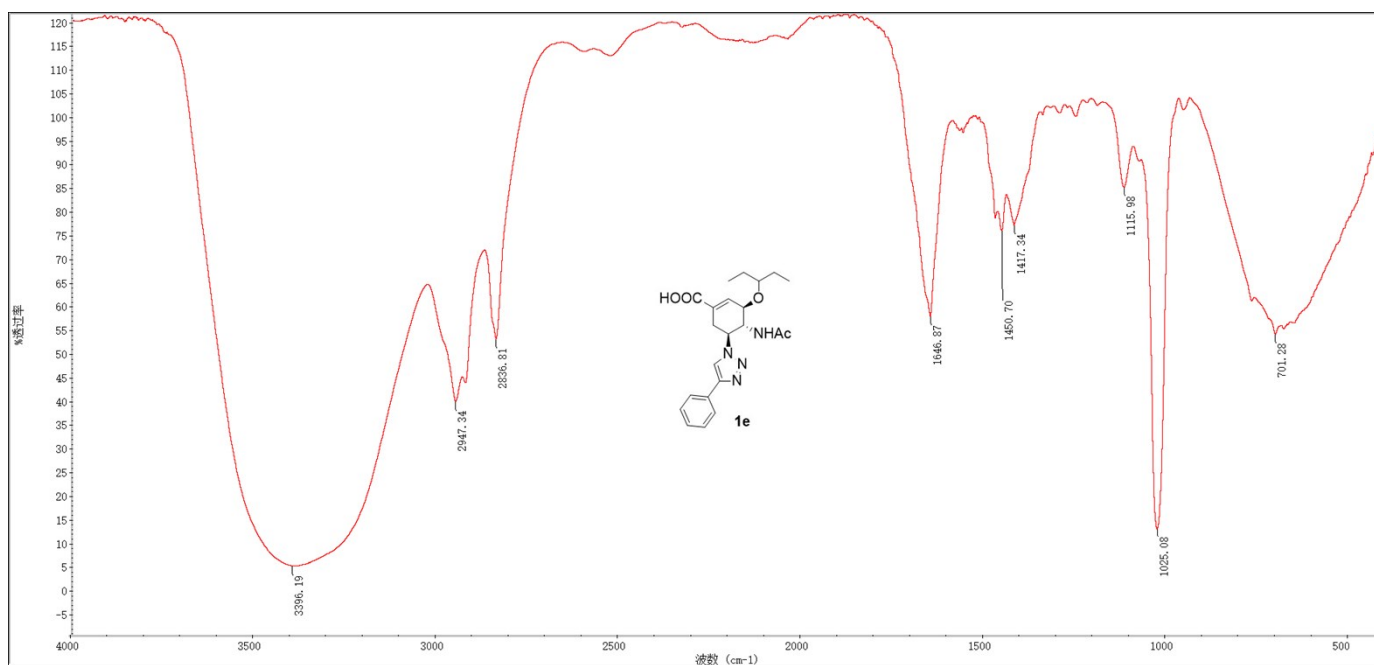



### $^1\text{H}$ NMR of **1f** (500 MHz, $\text{CD}_3\text{OD}$ )

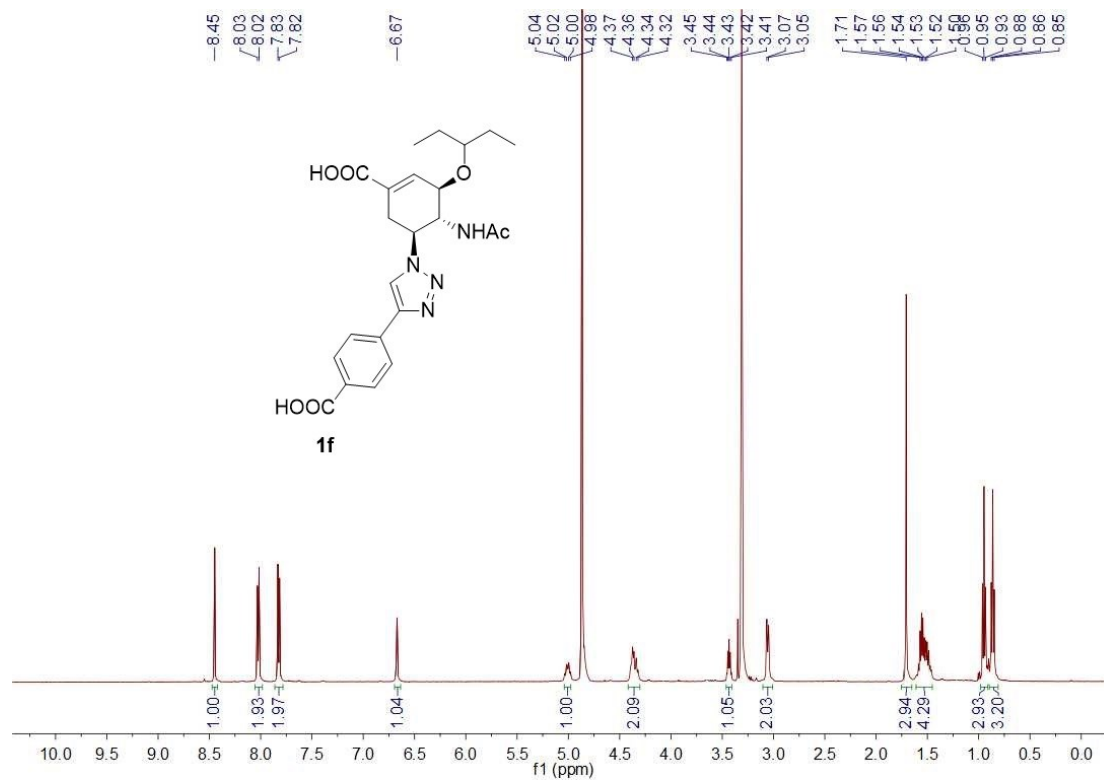

### $^{13}\text{C}$ NMR of **1f** (500 MHz, $\text{CD}_3\text{OD}$ )

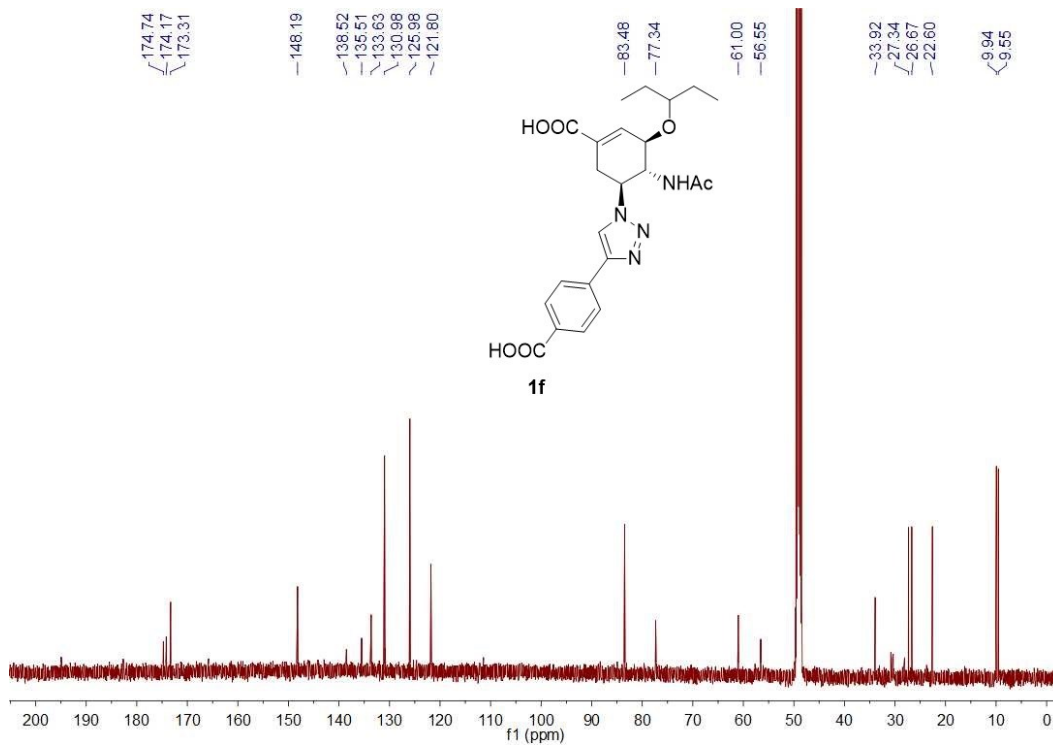

## HR-ESIMS of 1f

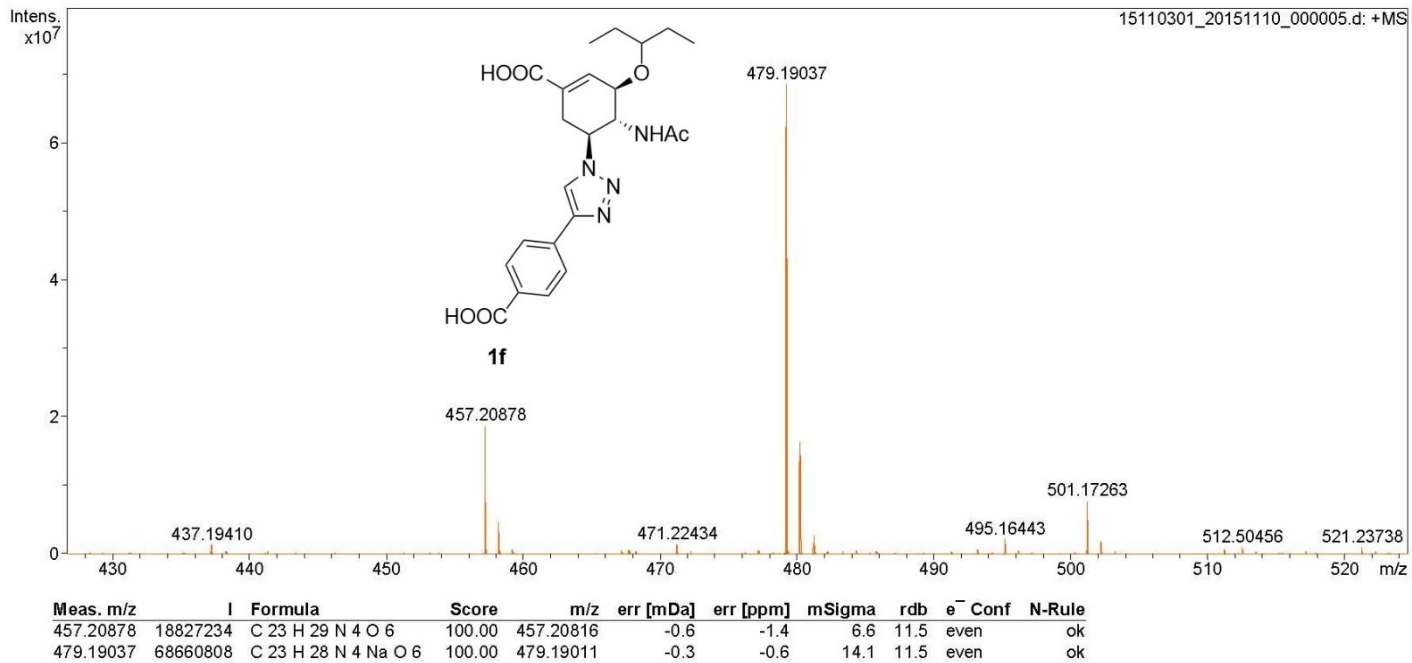

## IR of 1f

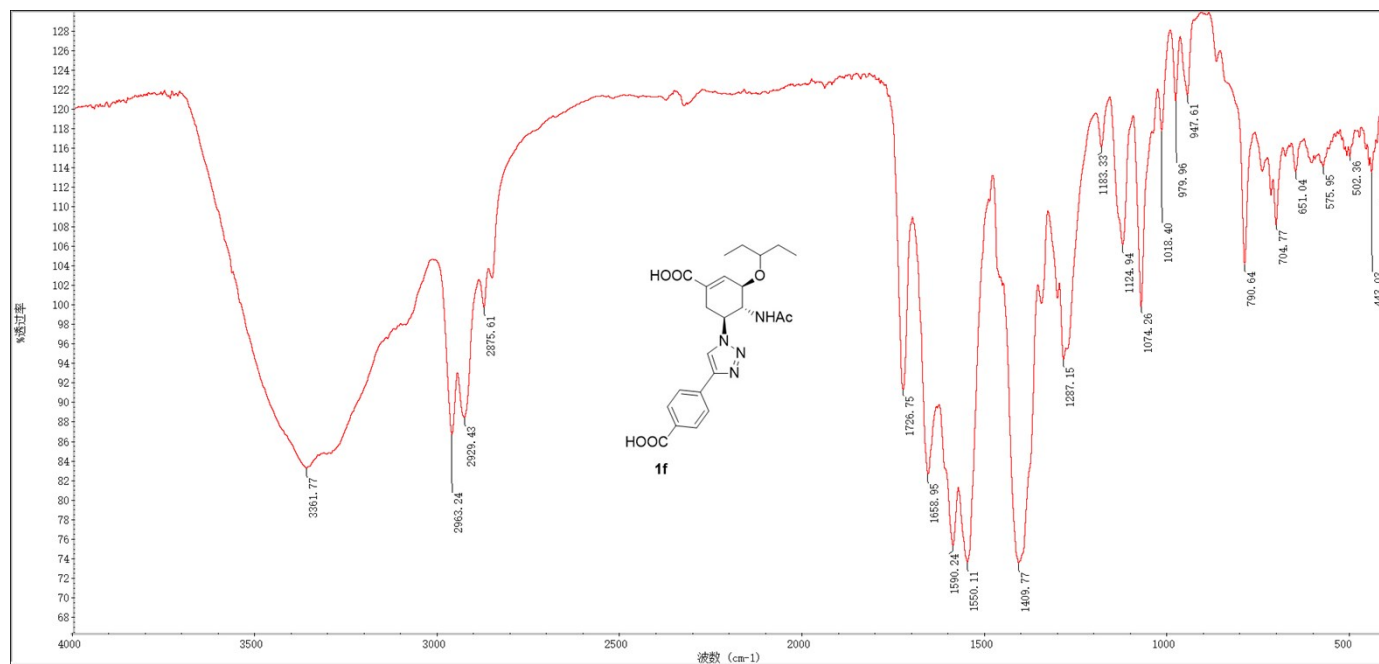

### <sup>1</sup>H NMR of 1g (500 MHz, CD<sub>3</sub>OD)

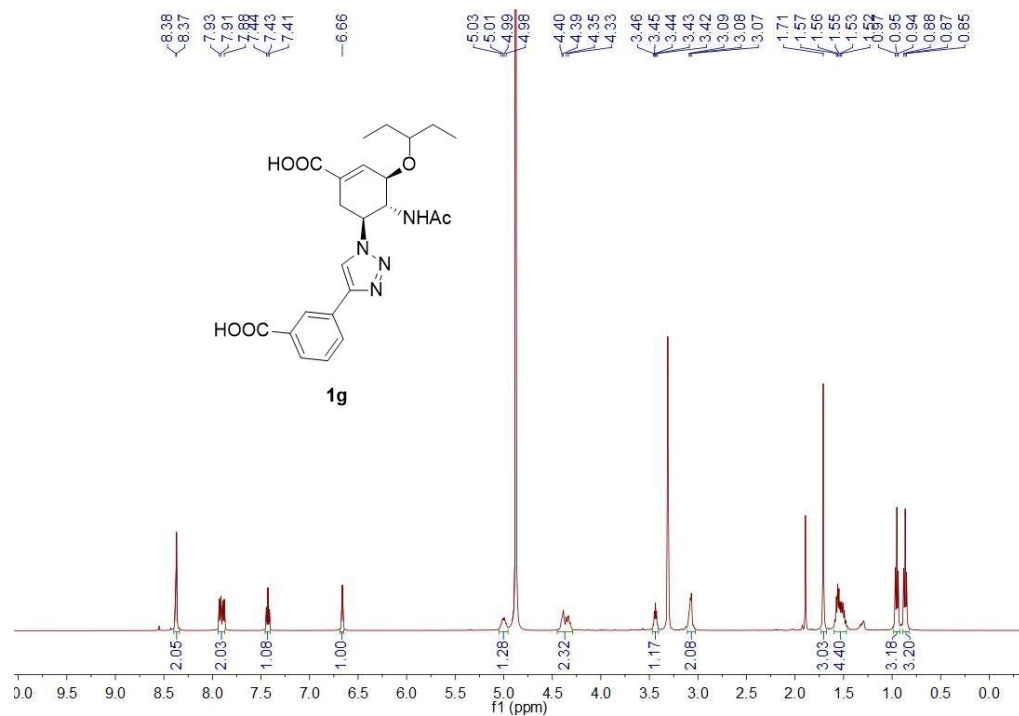

### <sup>13</sup>C NMR of 1g (500 MHz, CD<sub>3</sub>OD)

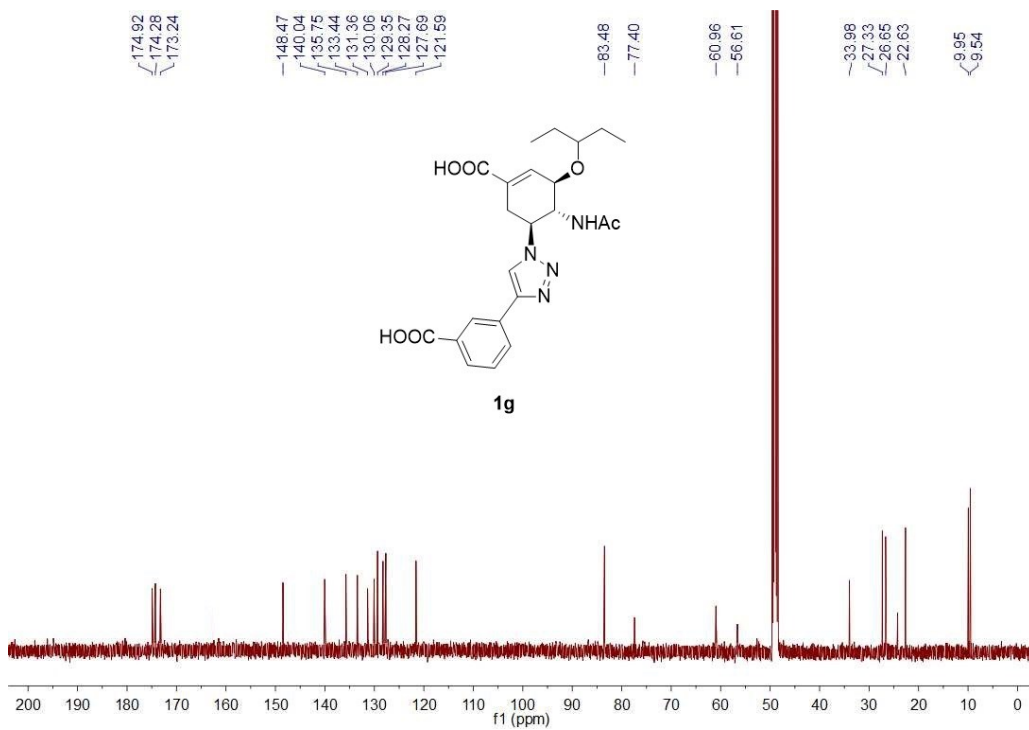

## HR-ESIMS of 1g

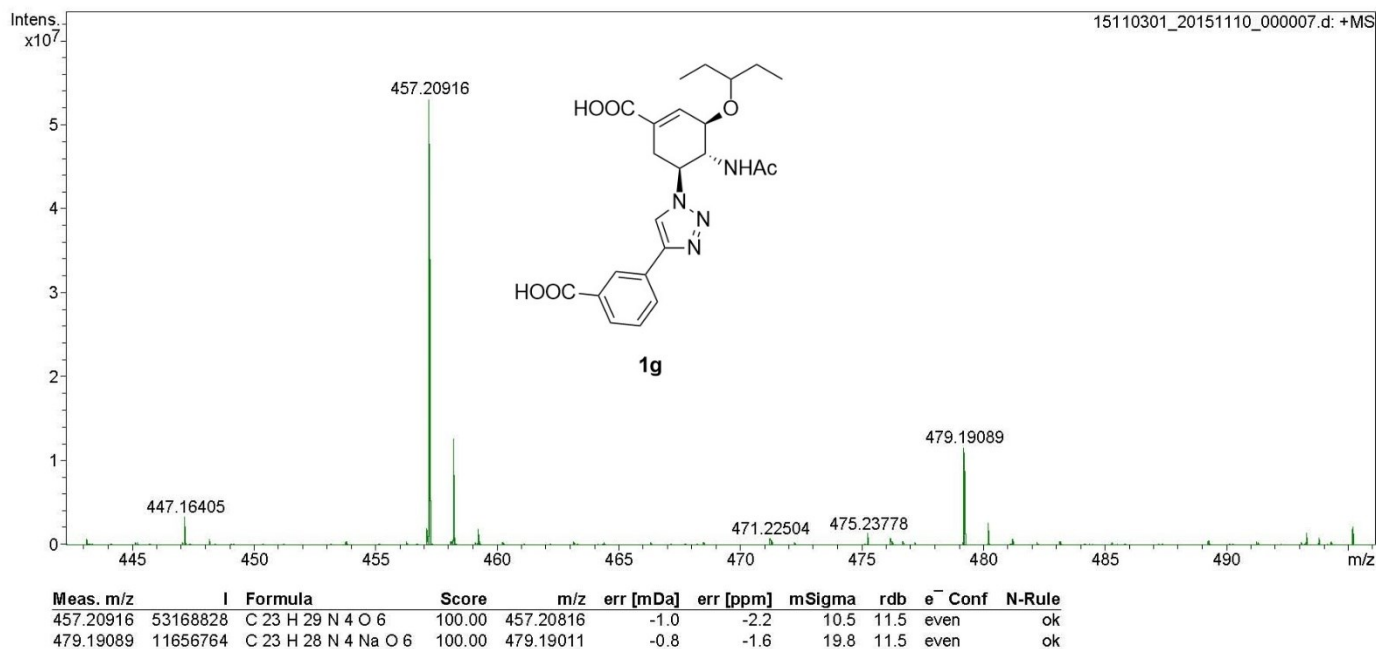

## IR of 1g

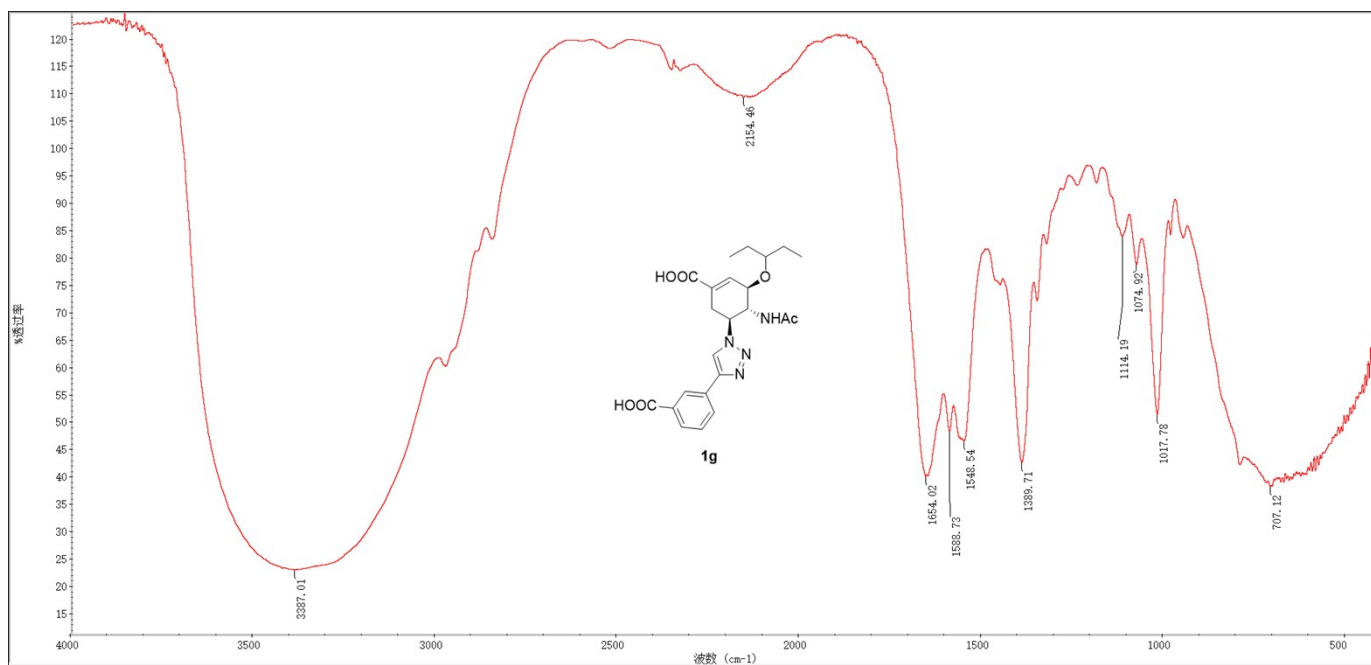



## HR-ESIMS of 1h

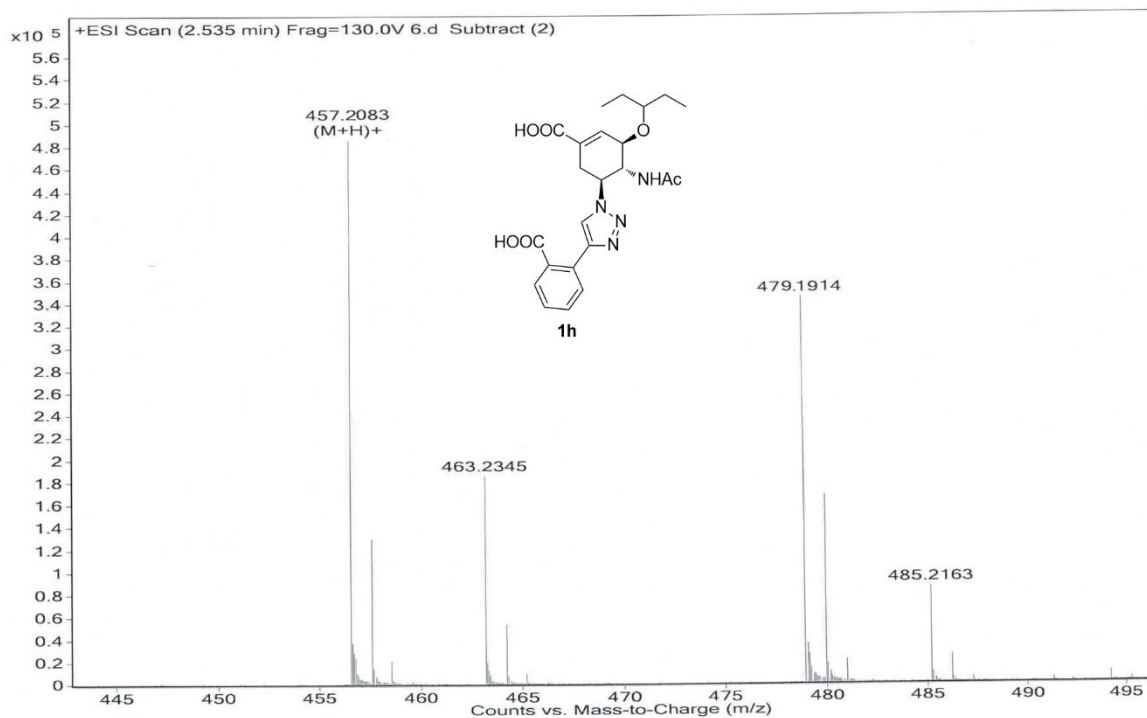

## IR of 1h

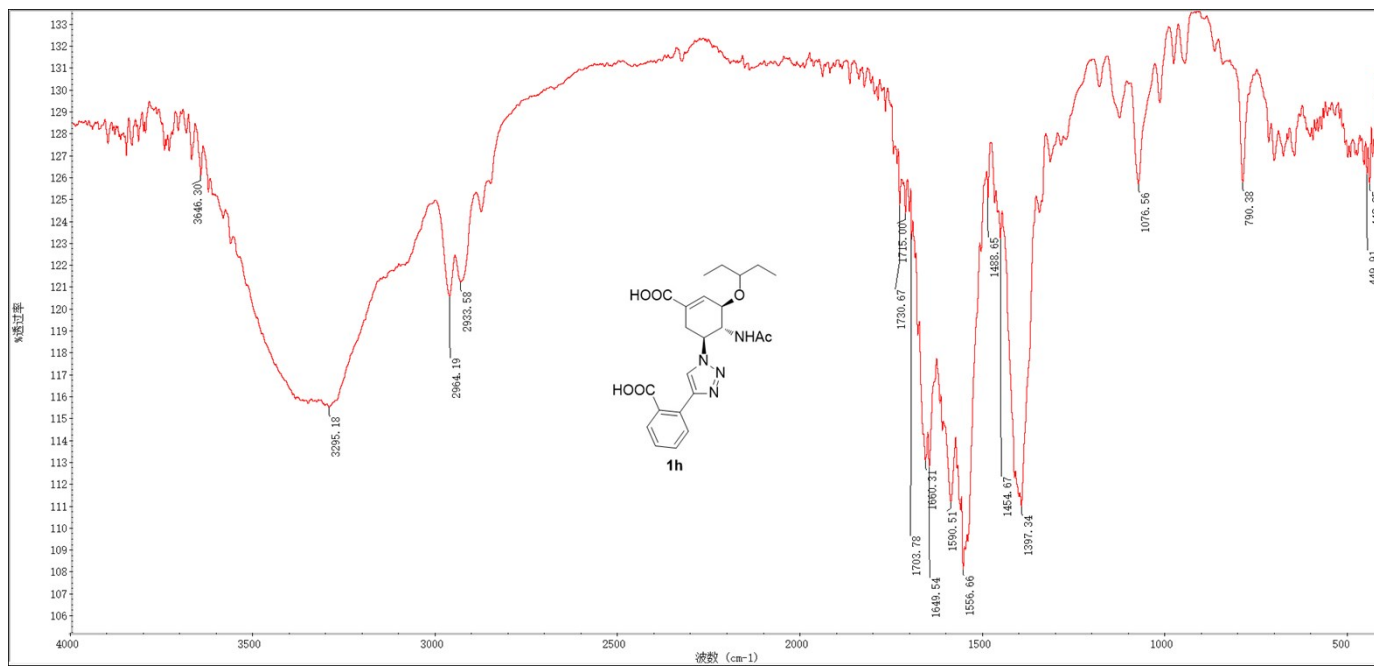

### $^1\text{H}$ NMR of **1i** (500 MHz, $\text{CD}_3\text{OD}$ )

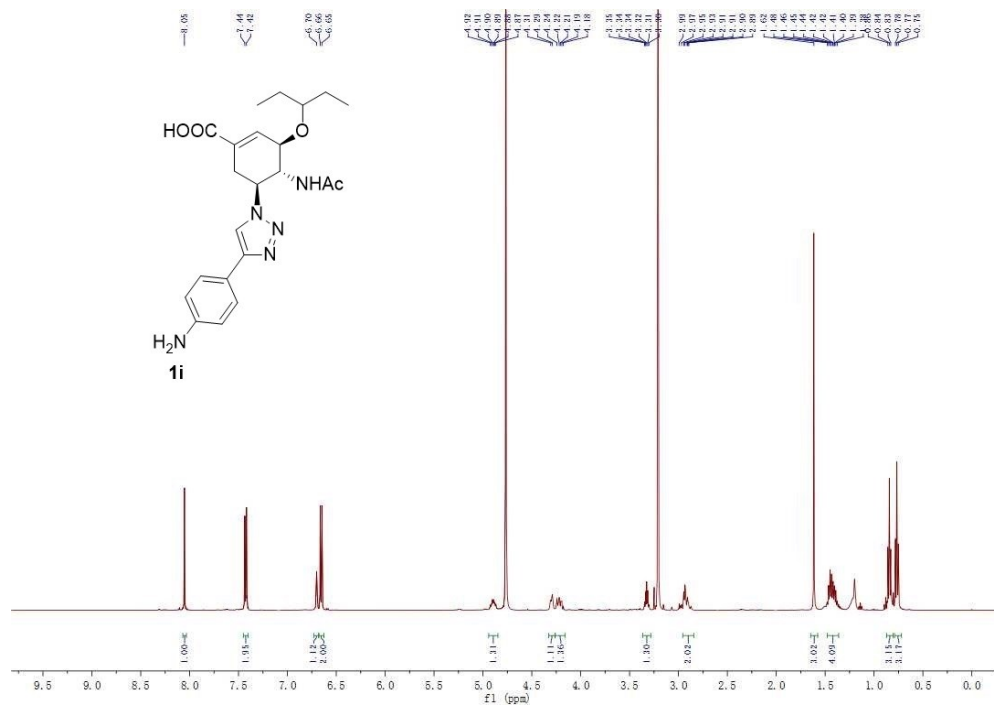

### $^{13}\text{C}$ NMR of **1i** (500 MHz, $\text{CD}_3\text{OD}$ )

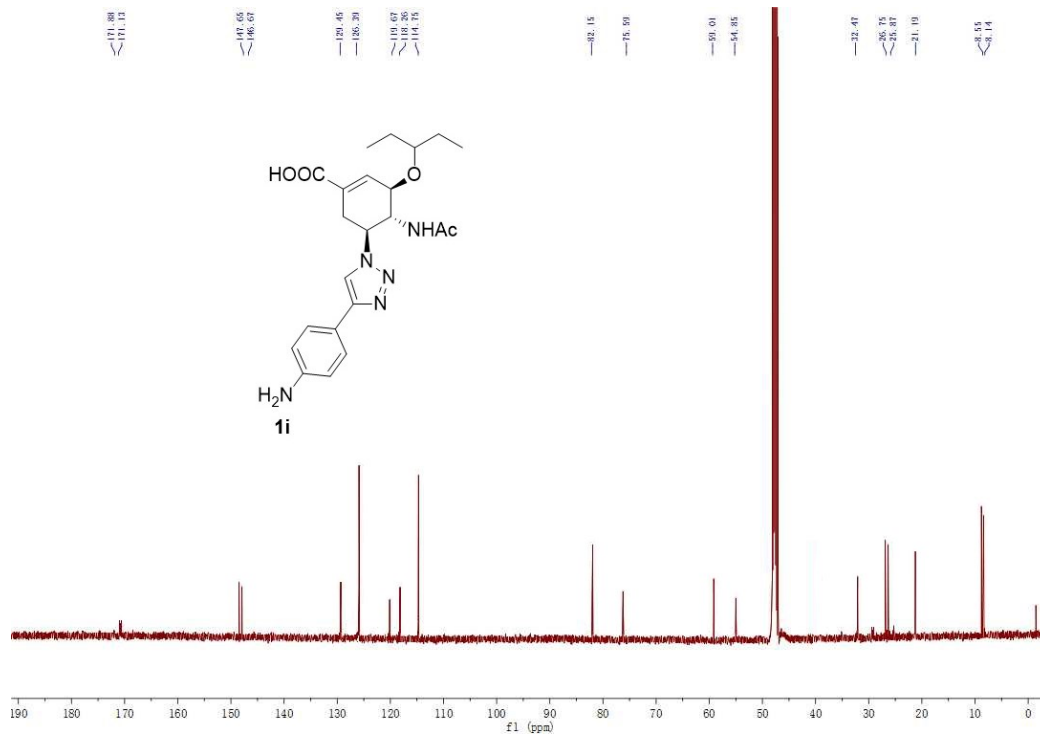

## HR-ESIMS of 1i

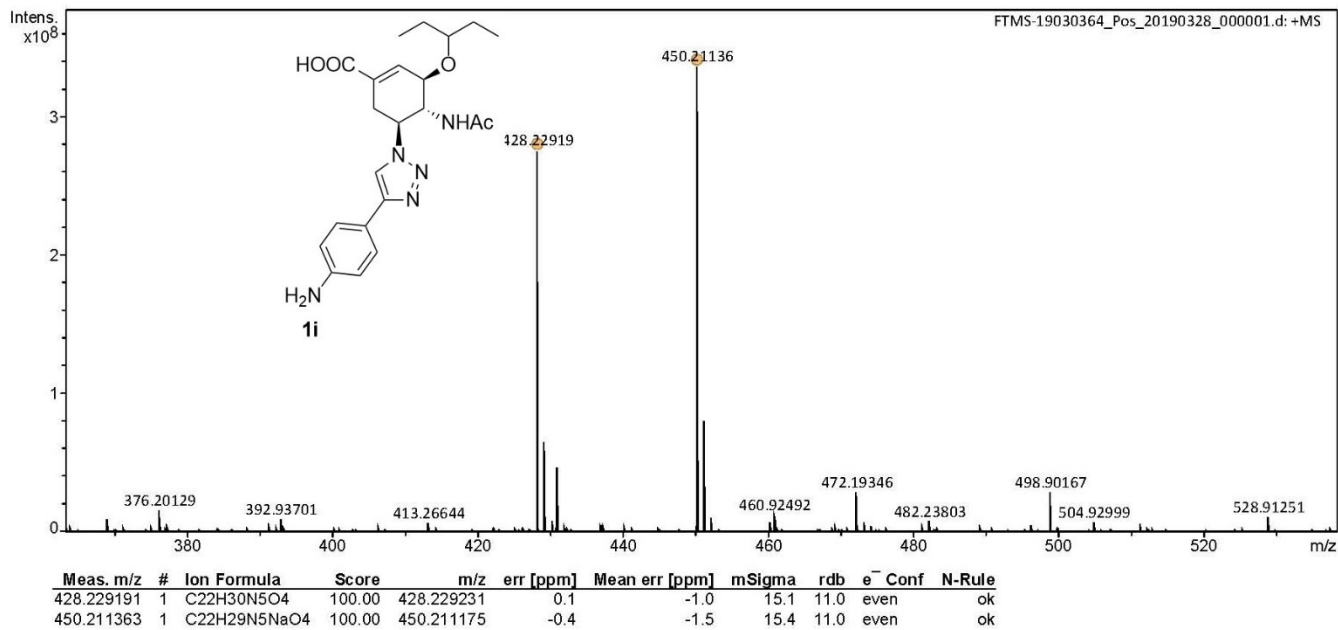

## IR of 1i

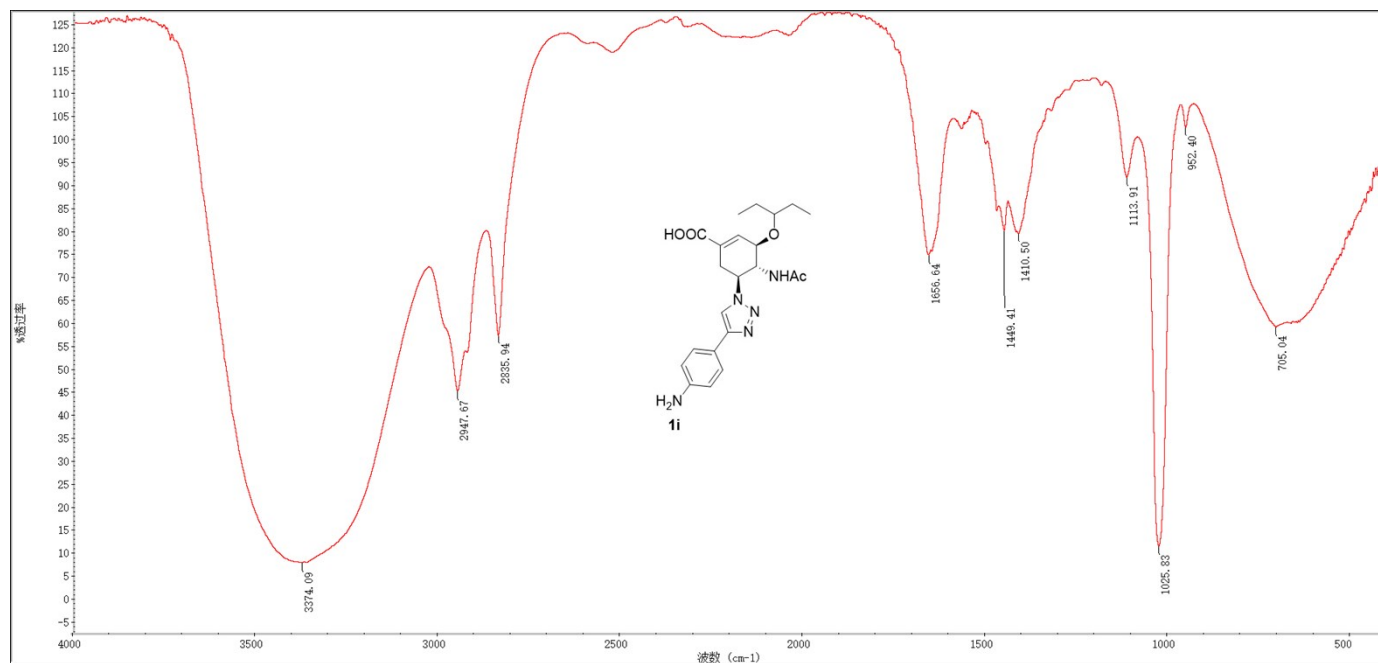



### <sup>1</sup>H NMR of 1j (500 MHz, CD<sub>3</sub>OD)

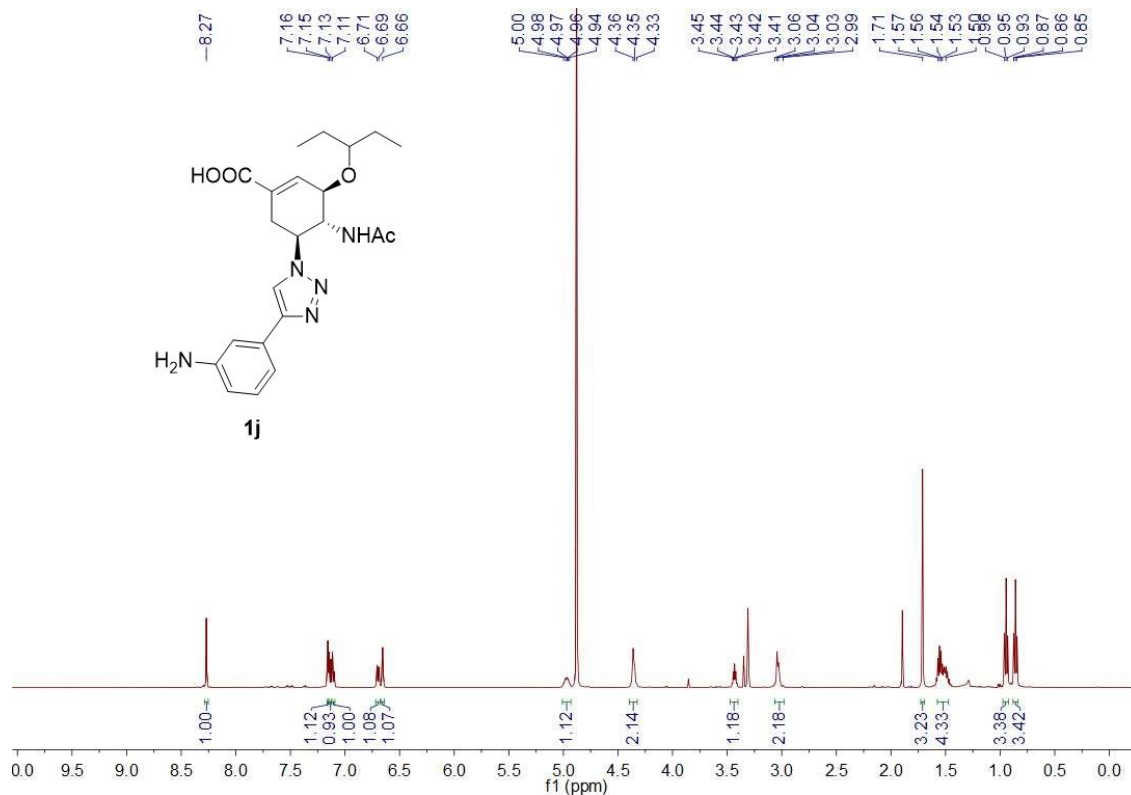

### <sup>13</sup>C NMR of 1j (500 MHz, CD<sub>3</sub>OD)

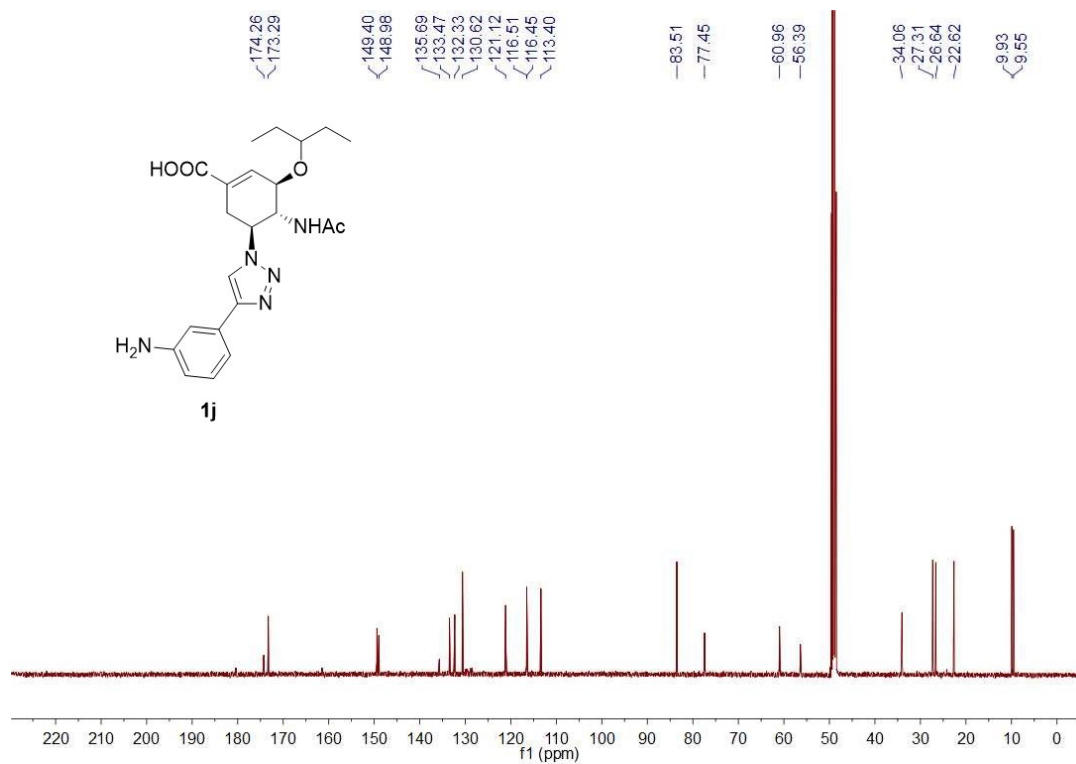

## HR-ESIMS of 1j

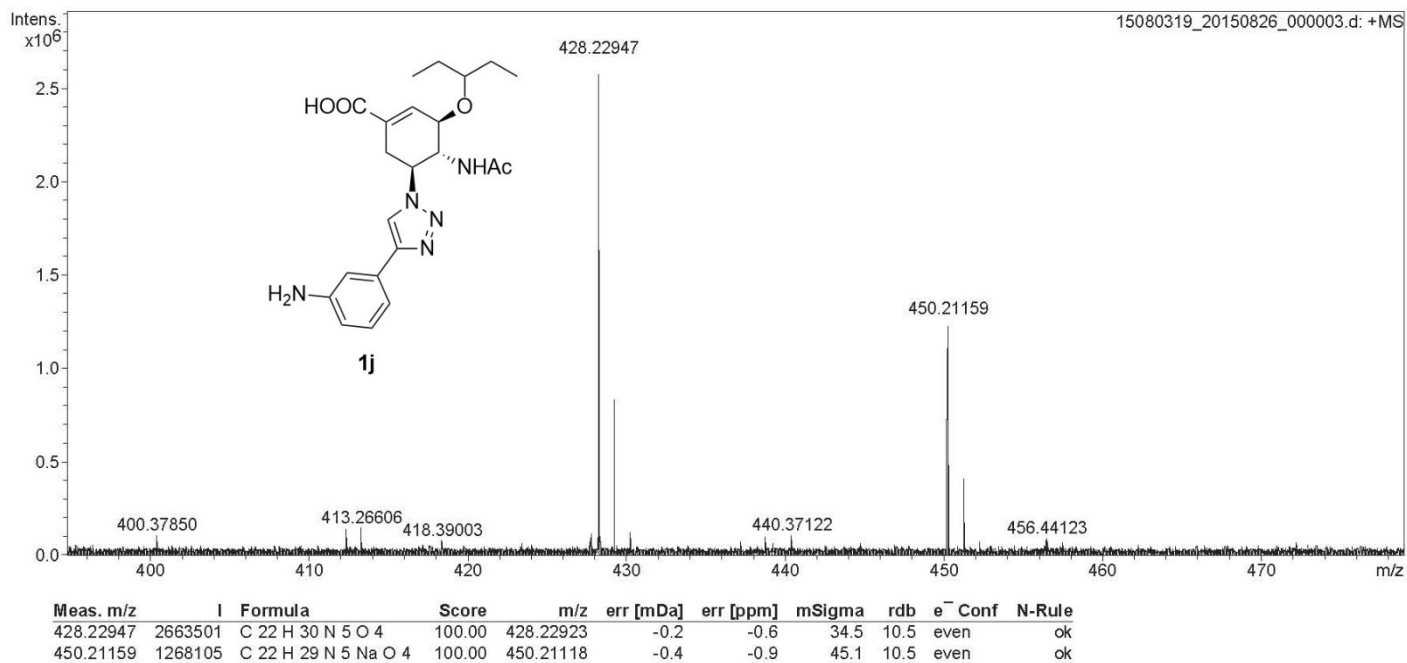

## IR of 1j

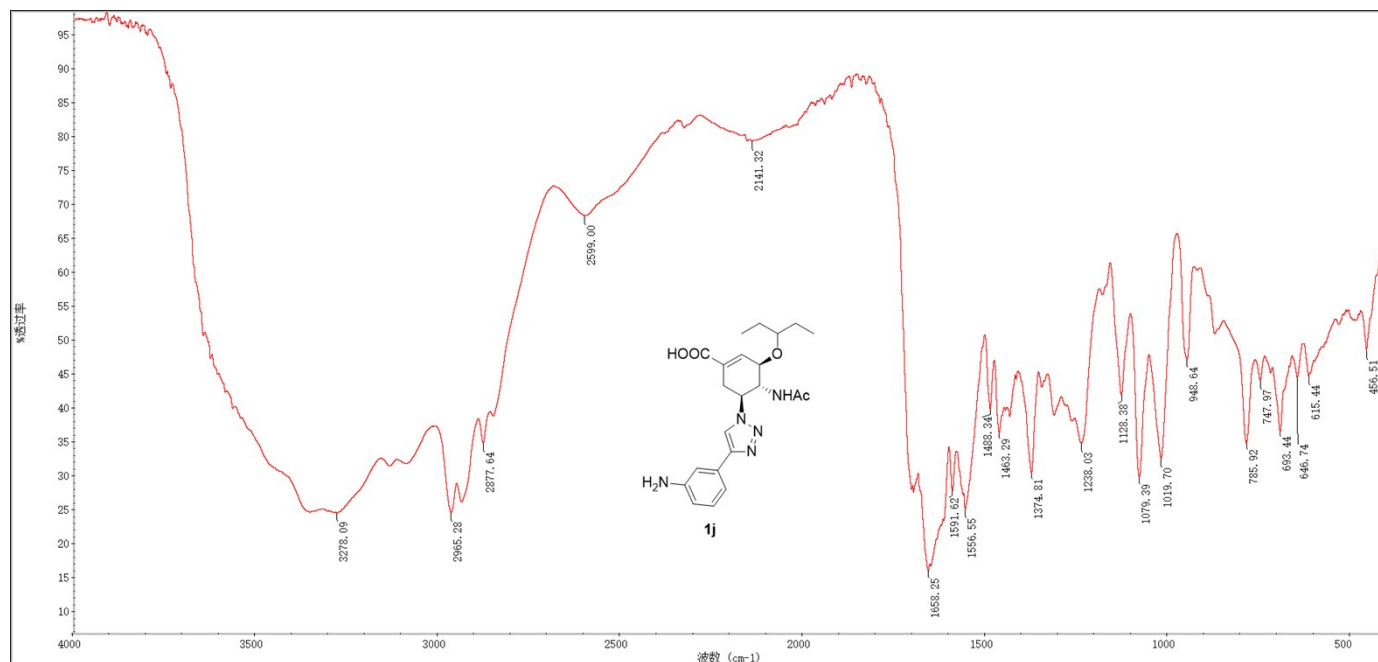

### <sup>1</sup>H NMR of 1k (500 MHz, CD<sub>3</sub>OD)

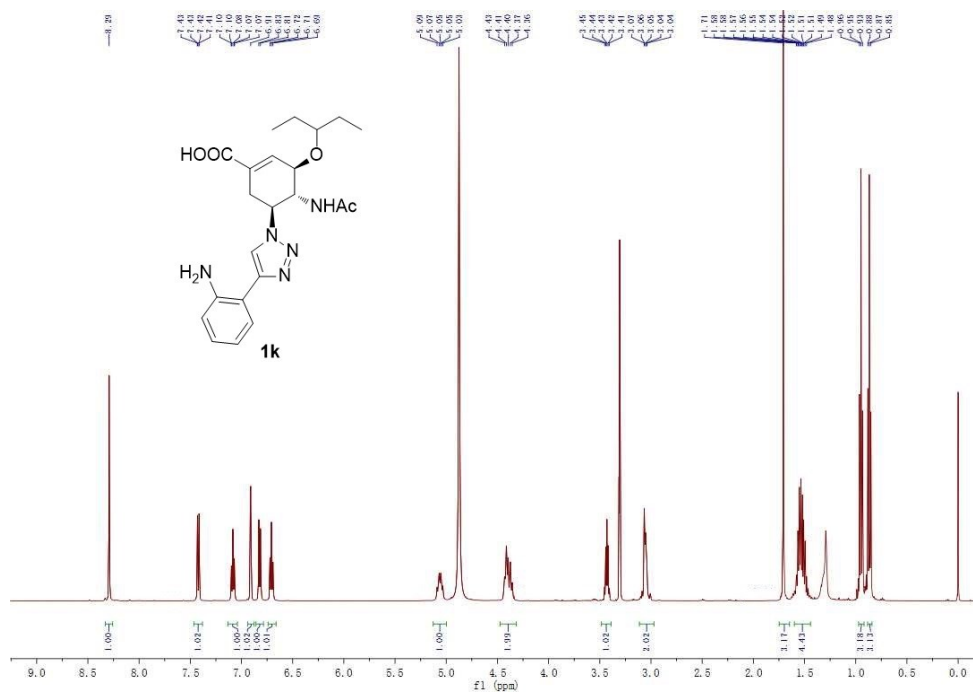

### <sup>13</sup>C NMR of 1k (500 MHz, CD<sub>3</sub>OD)

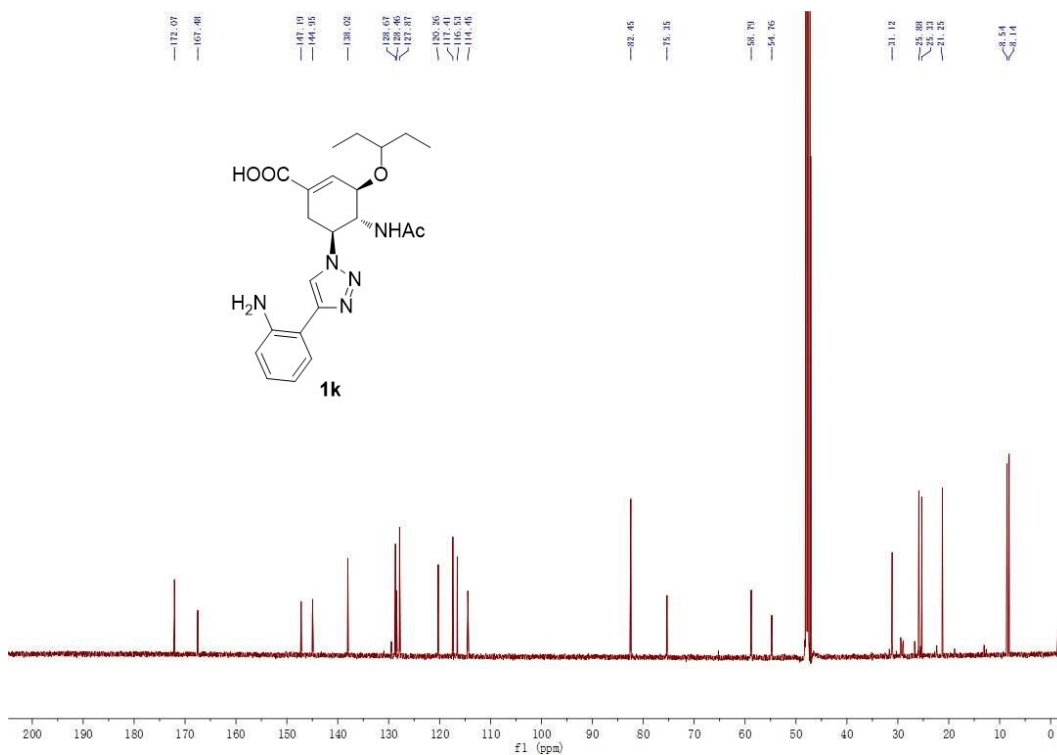

## HR-ESIMS of 1k

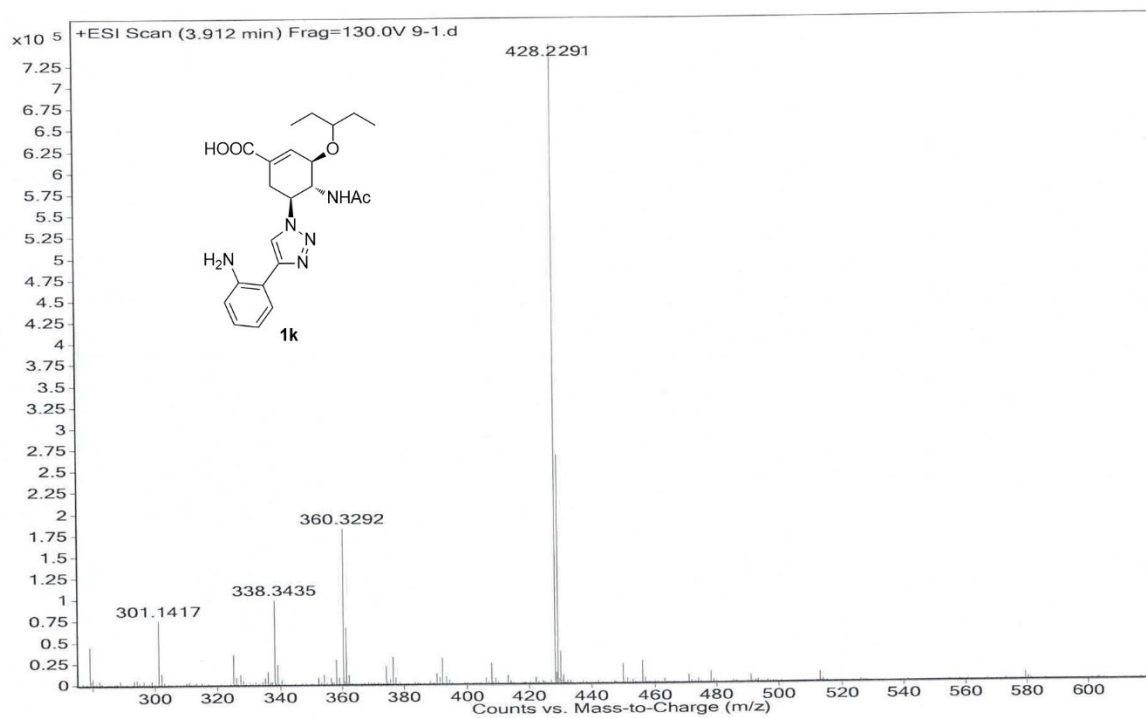

## IR of 1k

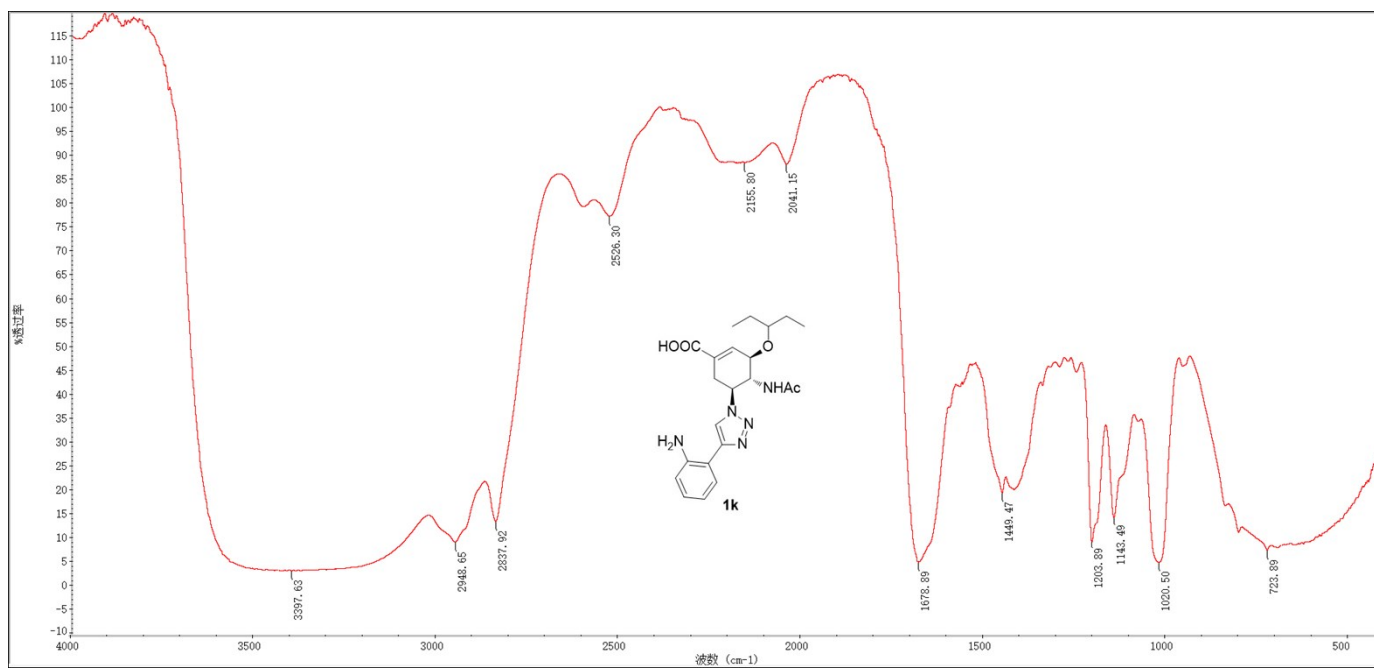

### $^1\text{H}$ NMR of 11 (500 MHz, $\text{CD}_3\text{OD}$ )

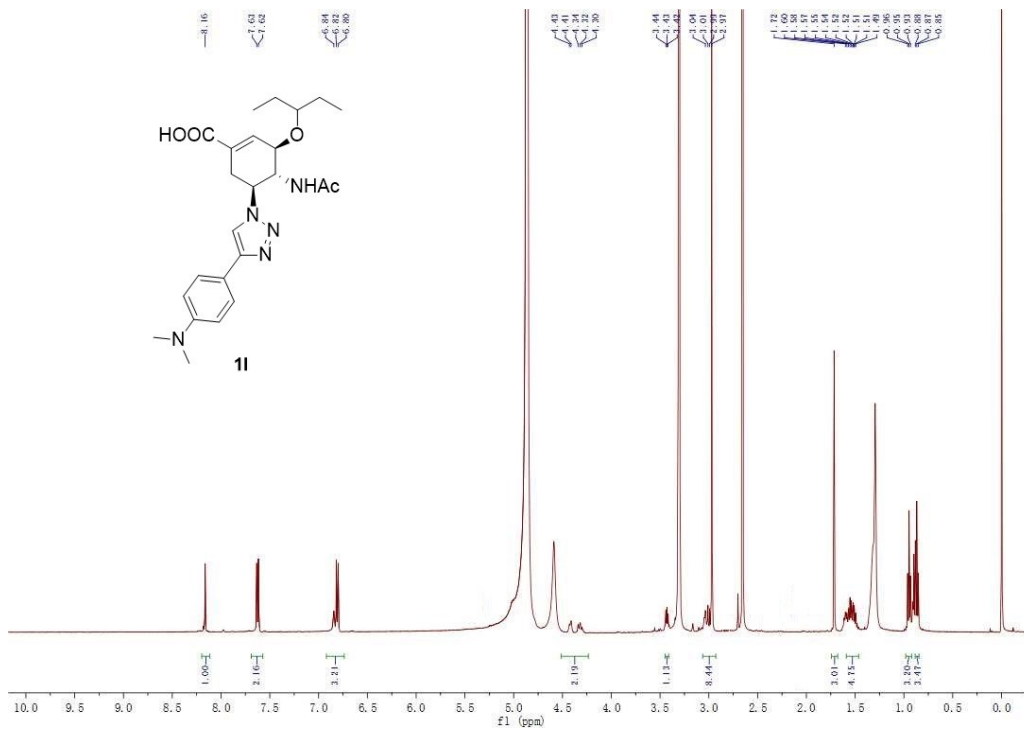

### $^{13}\text{C}$ NMR of 11 (500 MHz, $\text{CD}_3\text{OD}$ )

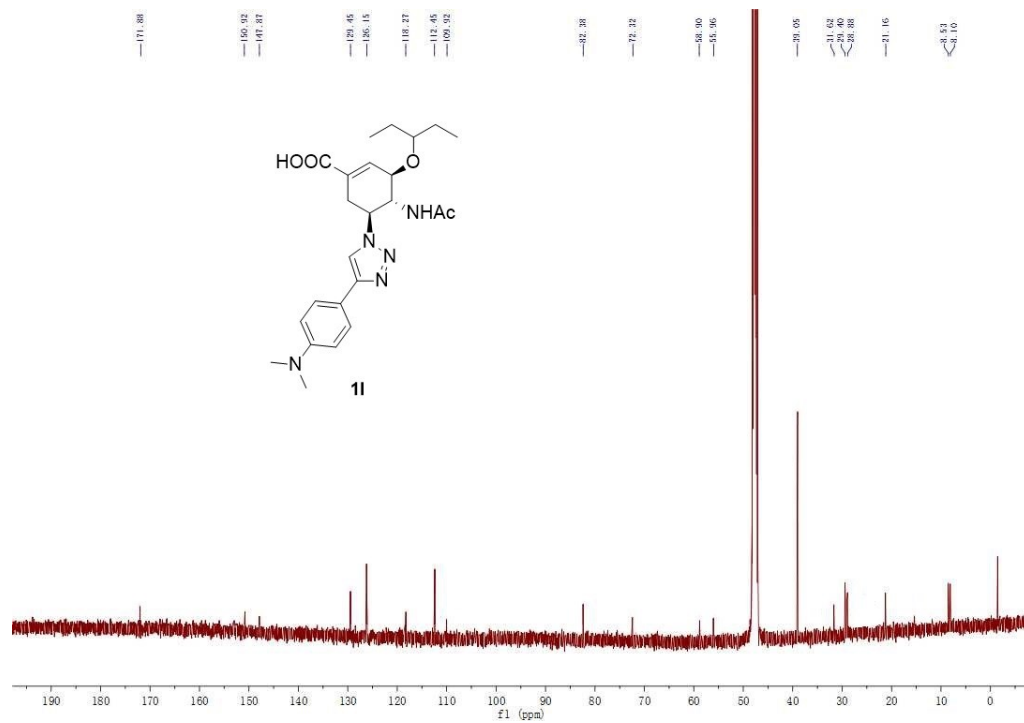

## HR-ESIMS of 11

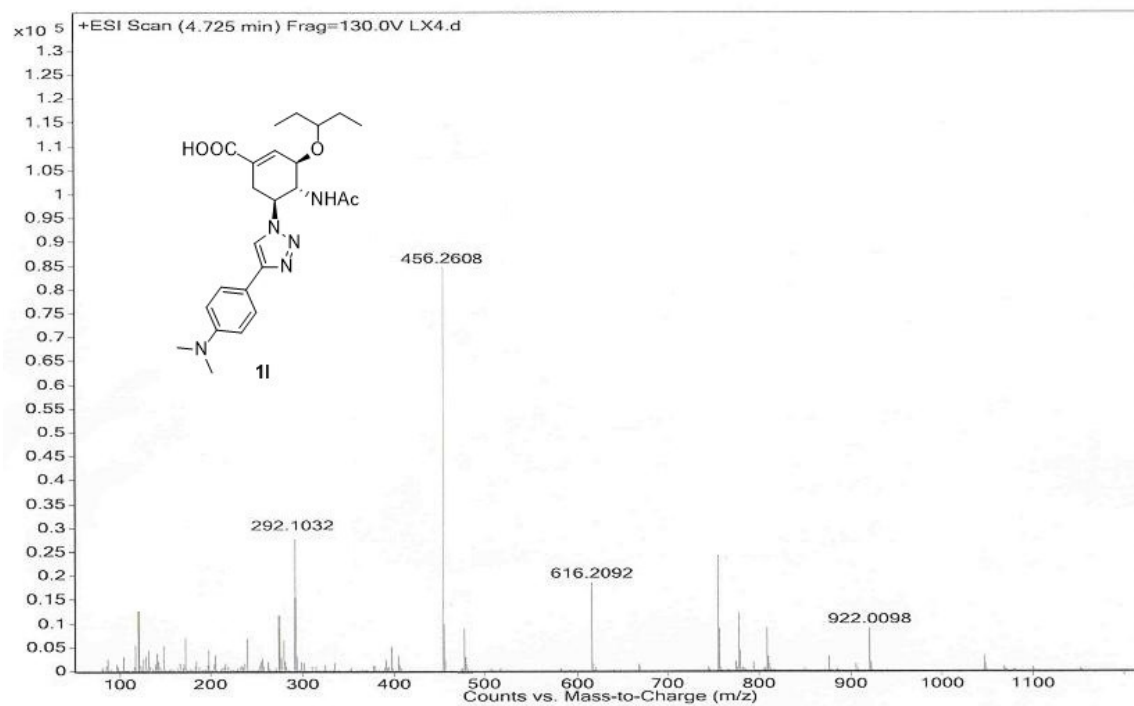

## IR of 11

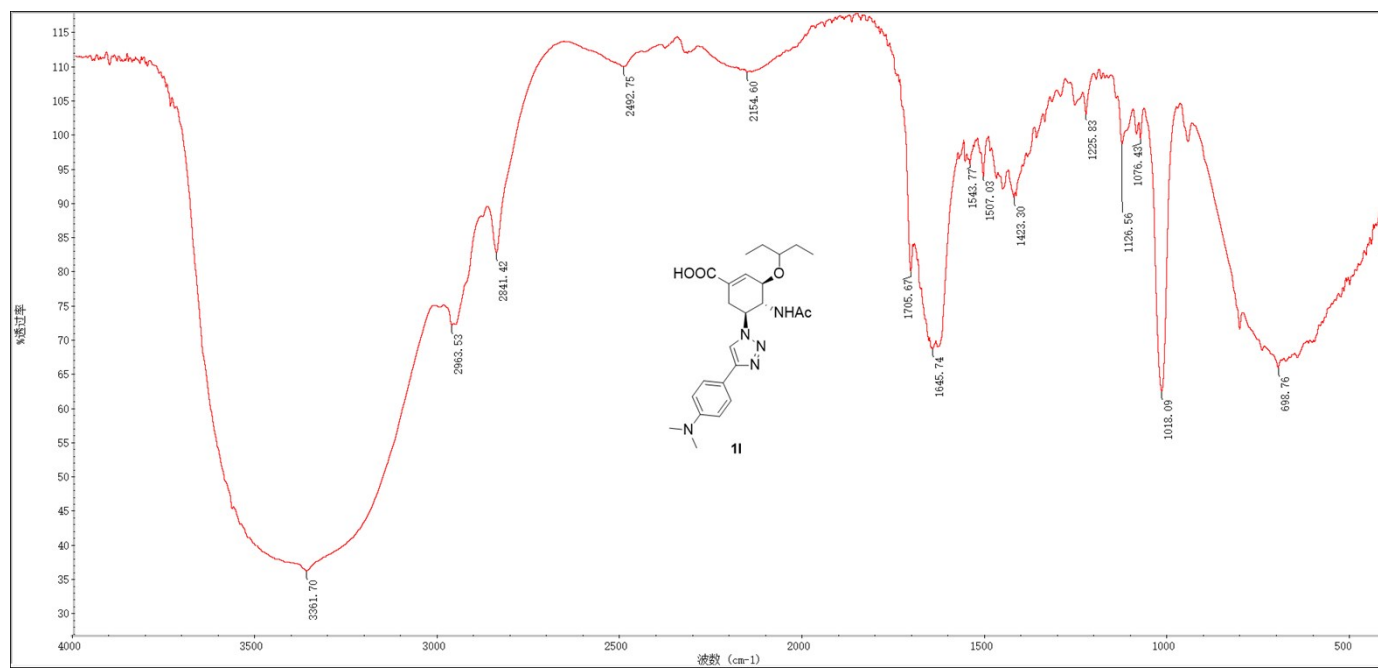

**<sup>1</sup>H NMR of 1m (500 MHz, CD<sub>3</sub>OD)**

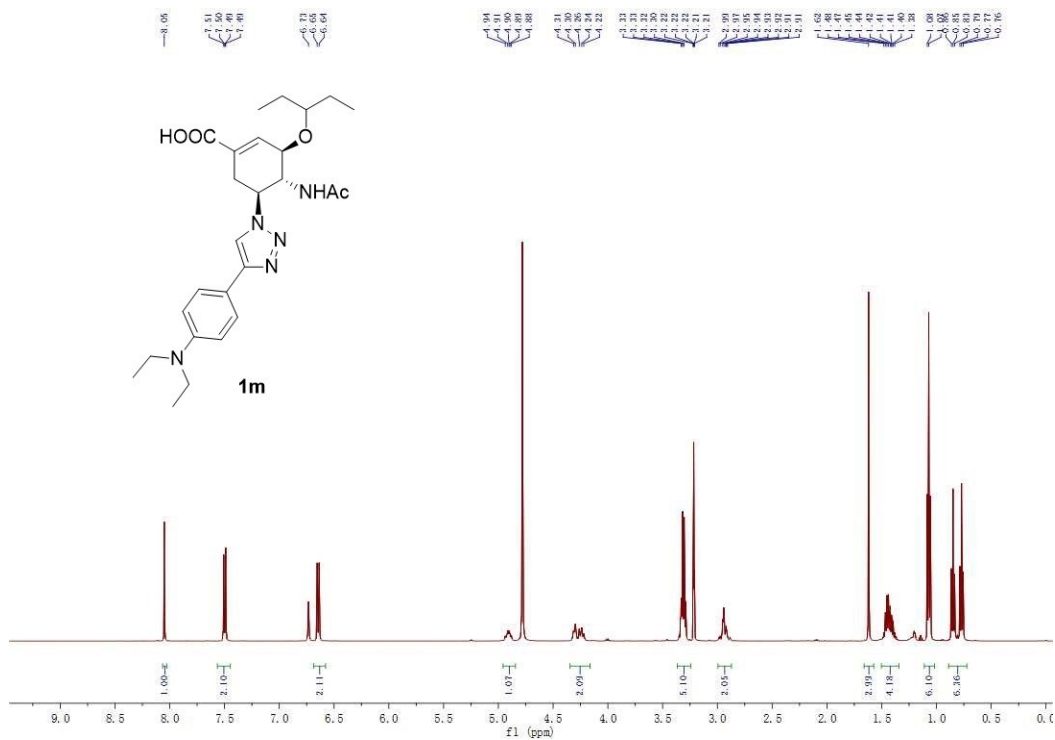

**<sup>13</sup>C NMR of 1m (500 MHz, CD<sub>3</sub>OD)**

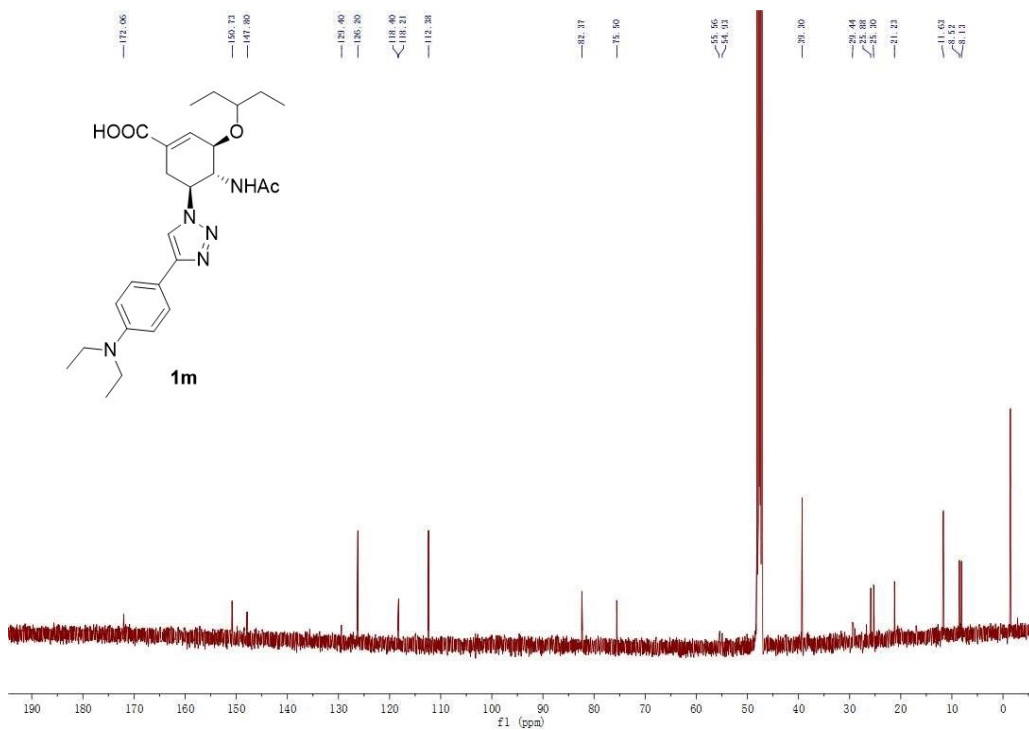

## HR-ESIMS of 1m

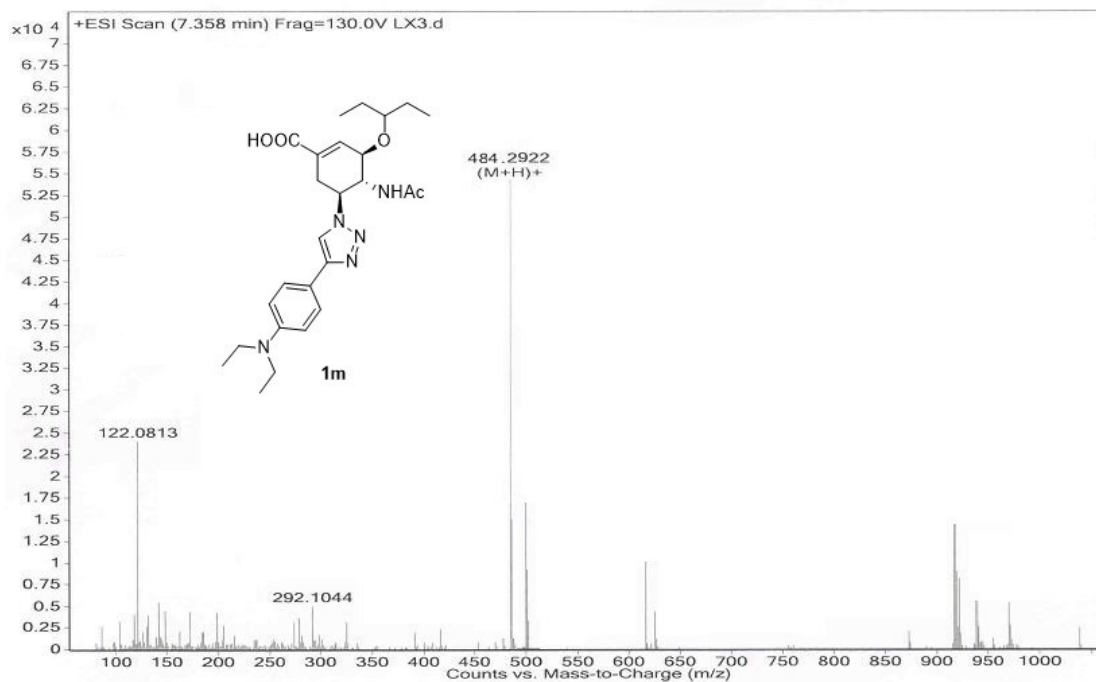

## IR of 1m

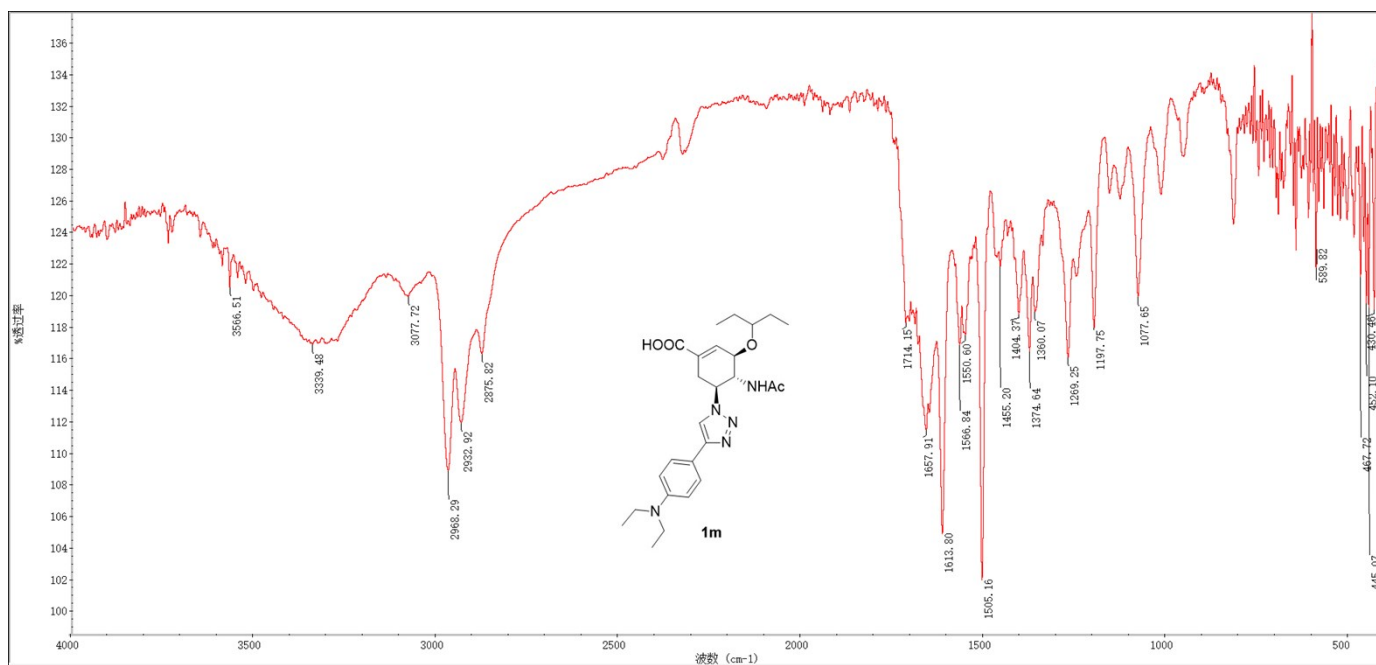



### $^1\text{H}$ NMR of **1n** (500 MHz, $\text{CD}_3\text{OD}$ )

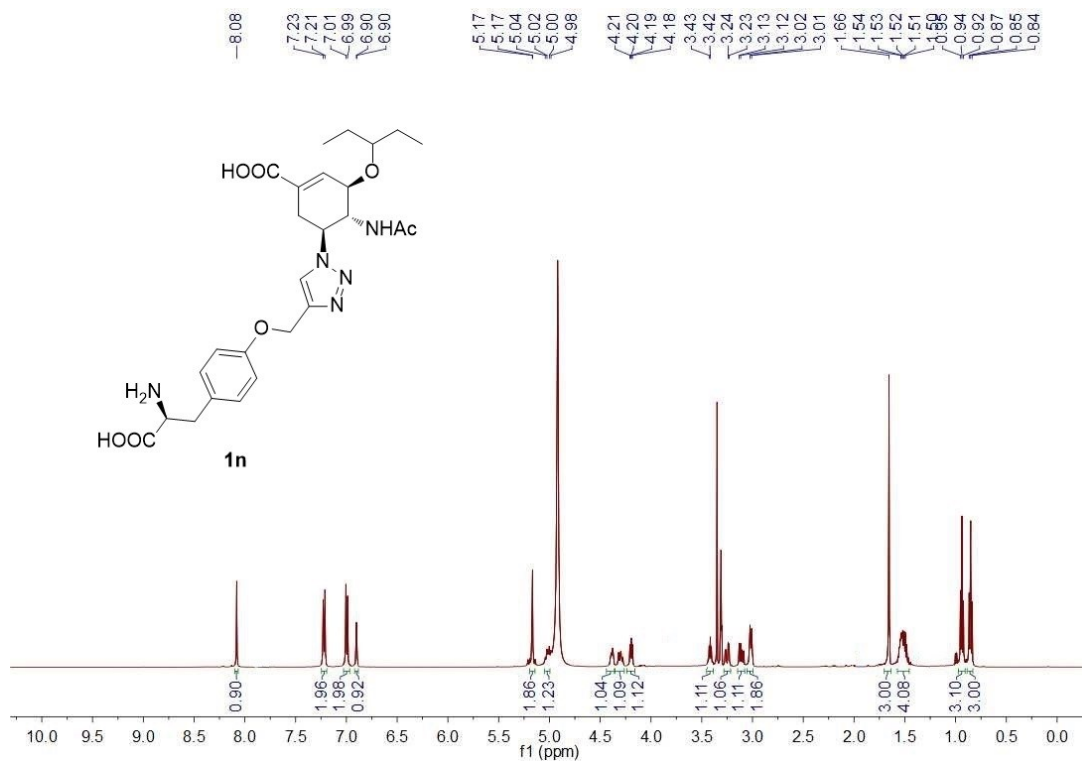

### $^{13}\text{C}$ NMR of **1n** (500 MHz, $\text{CD}_3\text{OD}$ )

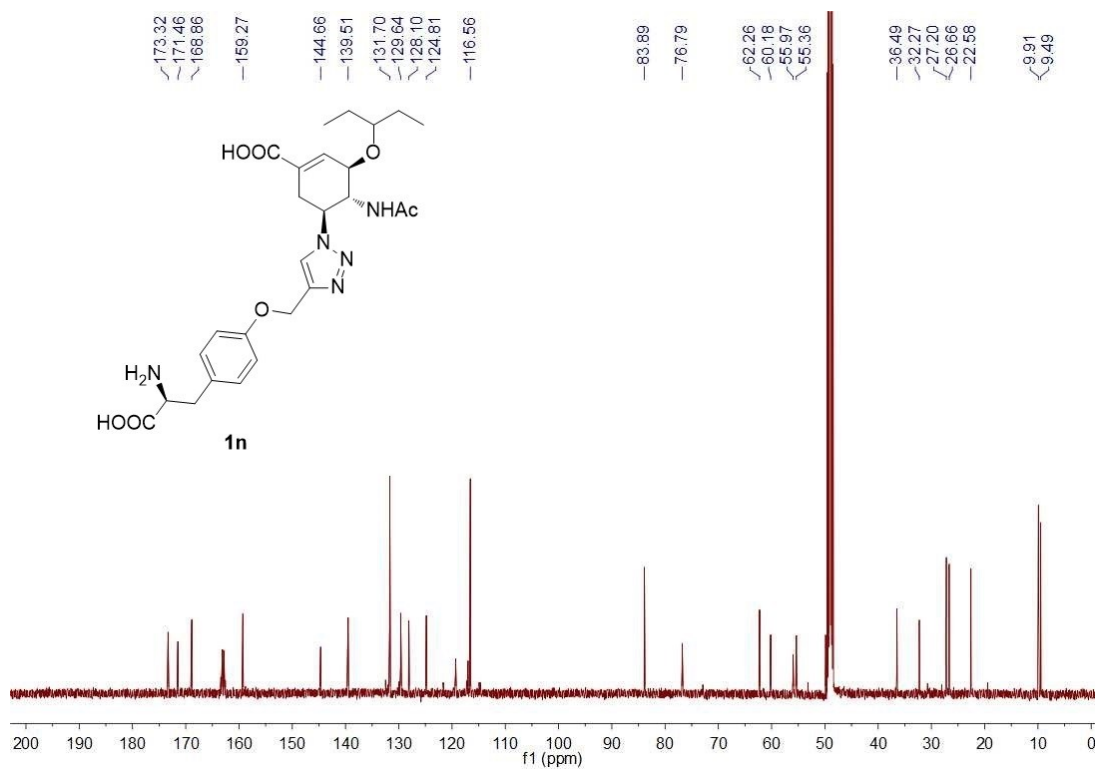

## HR-ESIMS of 1n

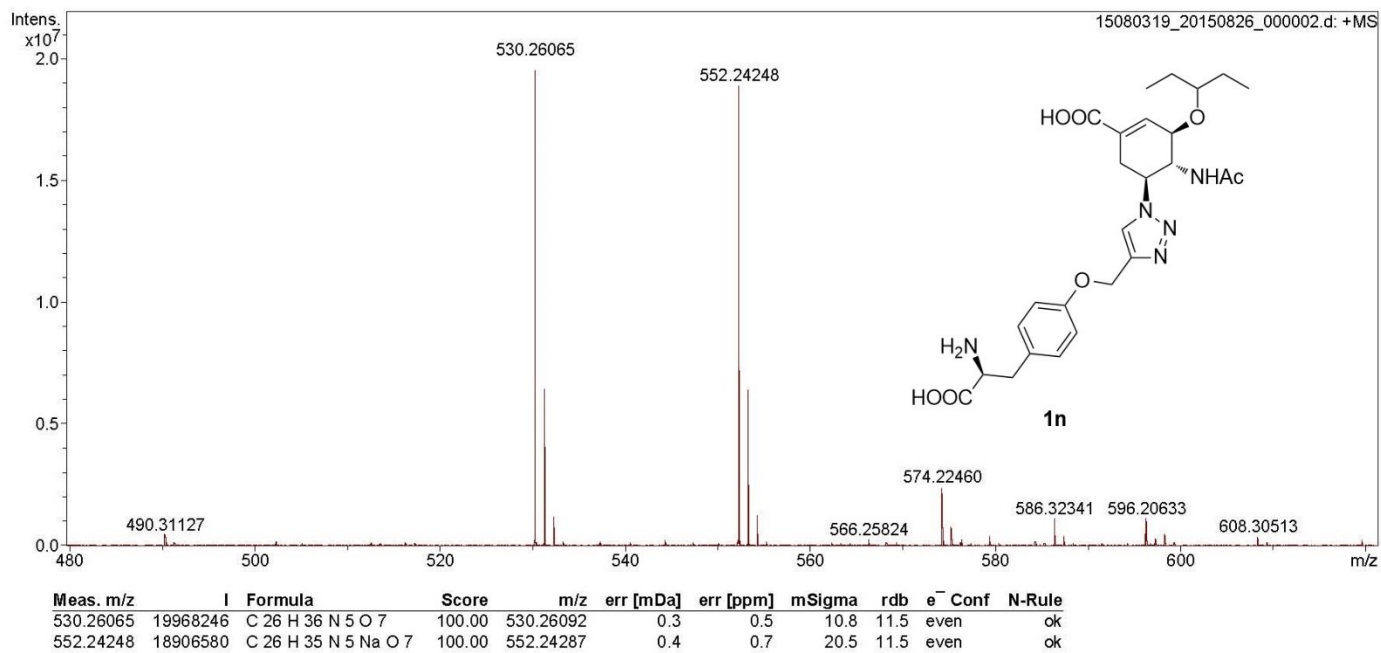

## IR of 1n

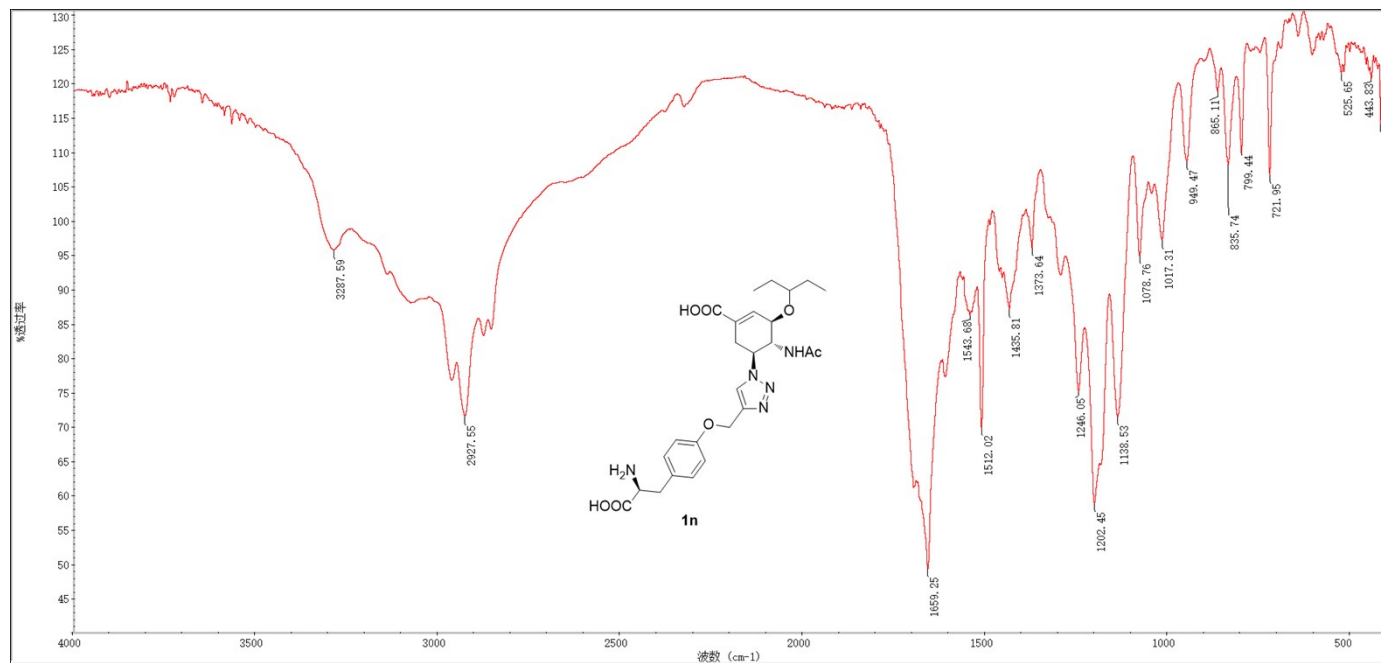

### $^1\text{H}$ NMR of 2e (500 MHz, $\text{CD}_3\text{OD}$ )

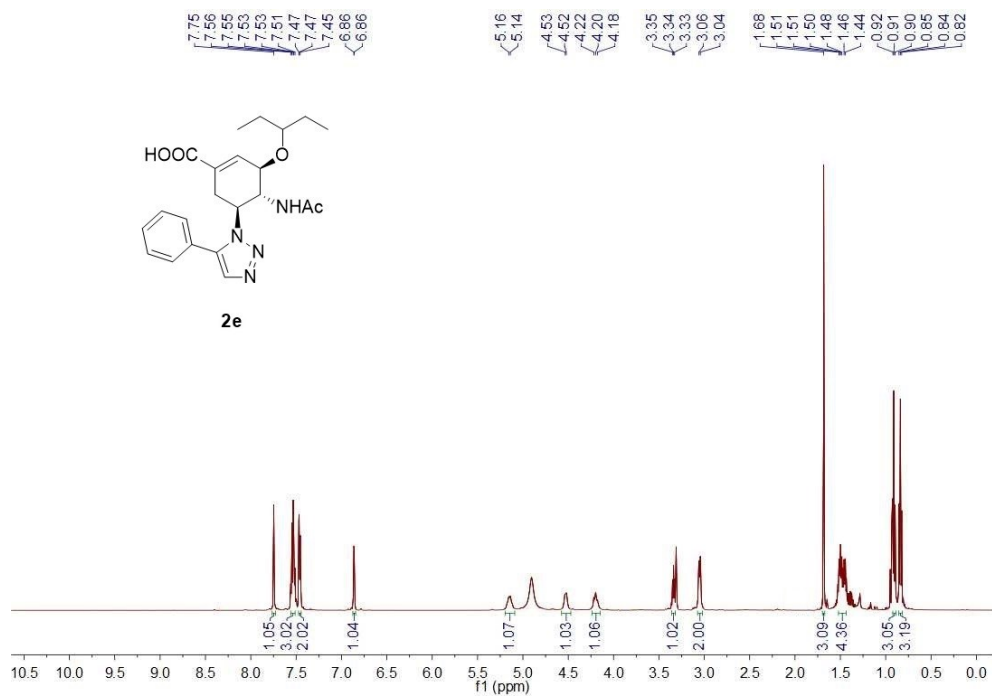

### $^{13}\text{C}$ NMR of 2e (500 MHz, $\text{CD}_3\text{OD}$ )

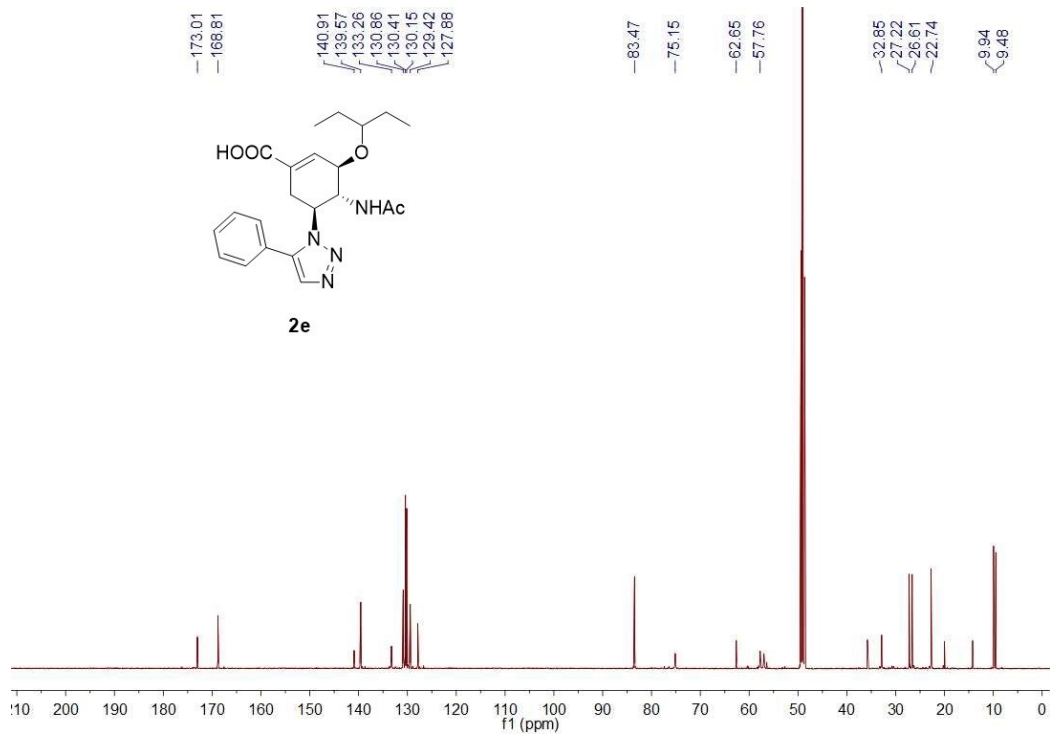

## HR-ESIMS of 2e

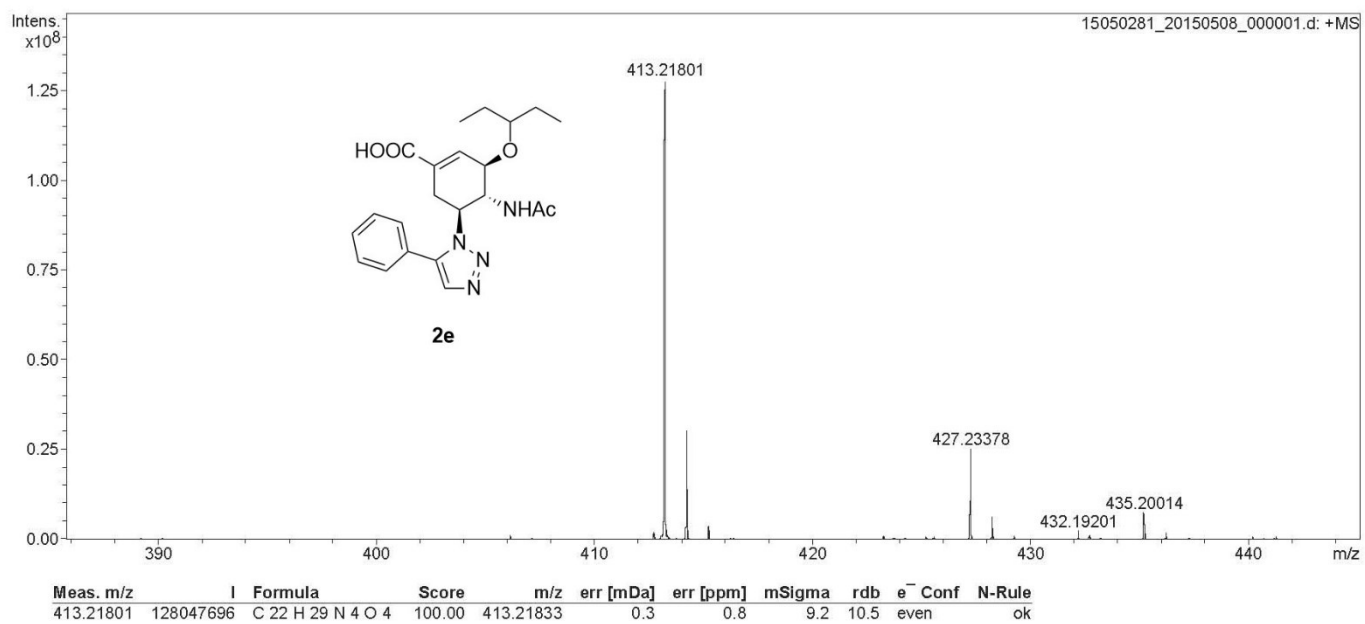

## IR of 2e

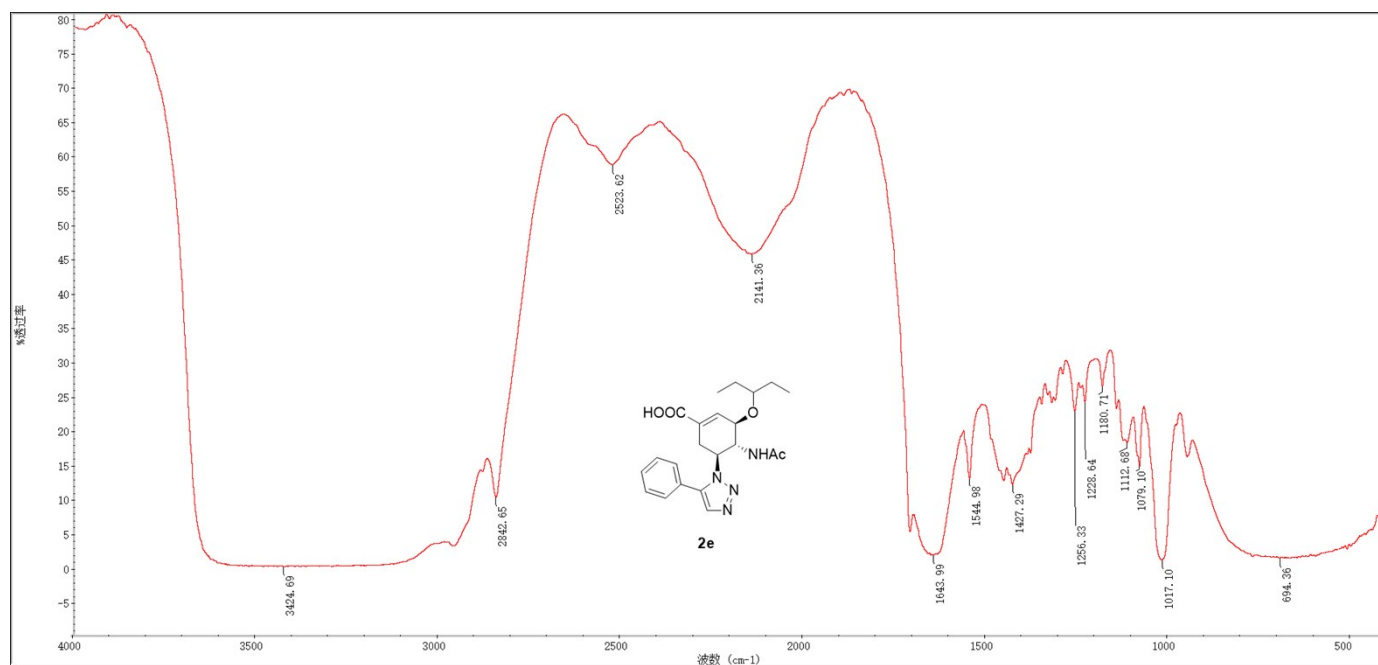

### $^1\text{H}$ NMR of 2f (500 MHz, $\text{CD}_3\text{OD}$ )

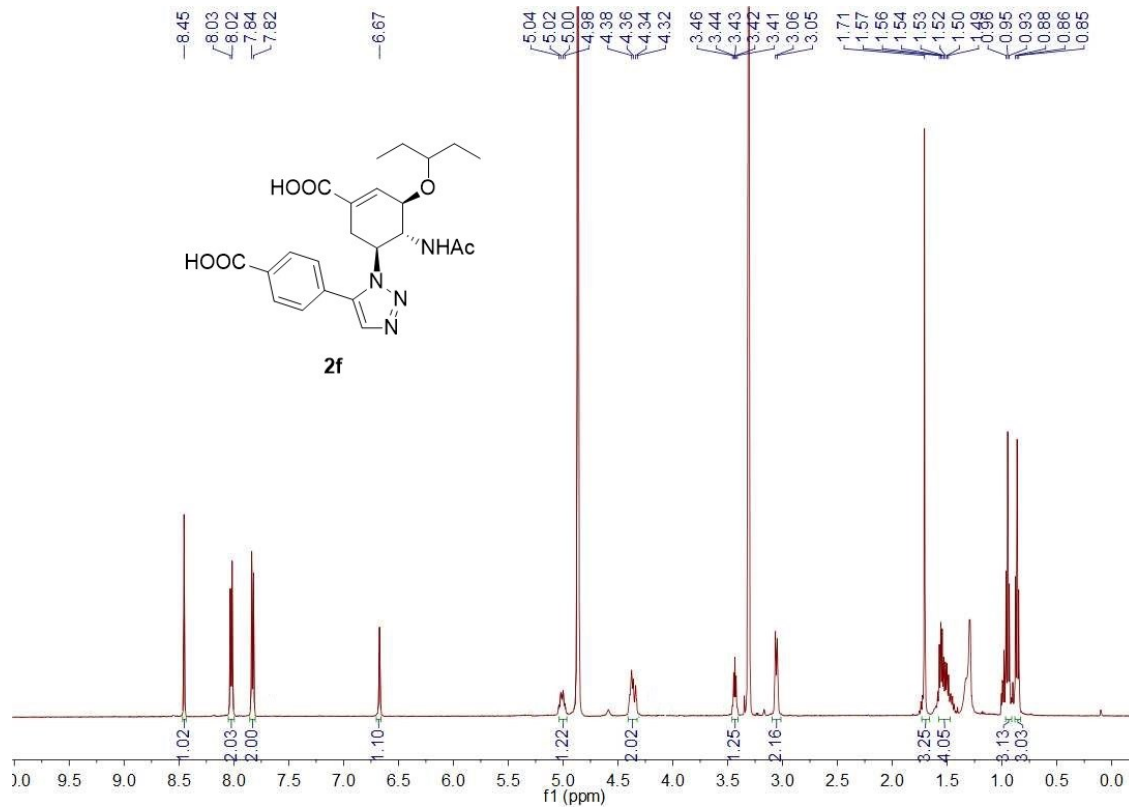

### $^{13}\text{C}$ NMR of 2f (500 MHz, $\text{CD}_3\text{OD}$ )

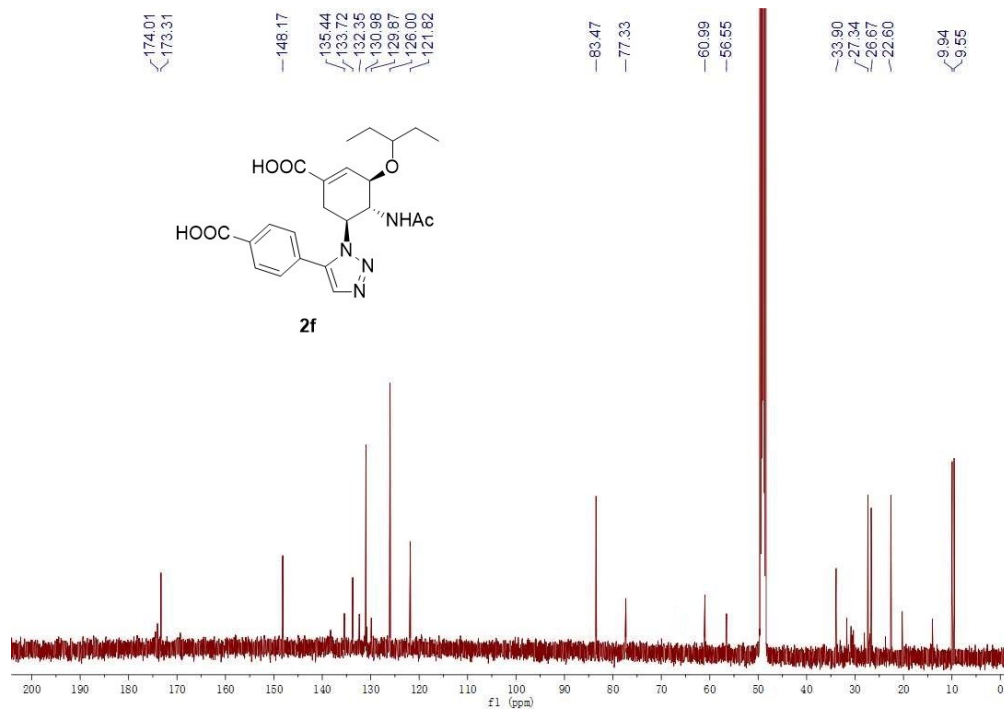

## HR-ESIMS of 2f

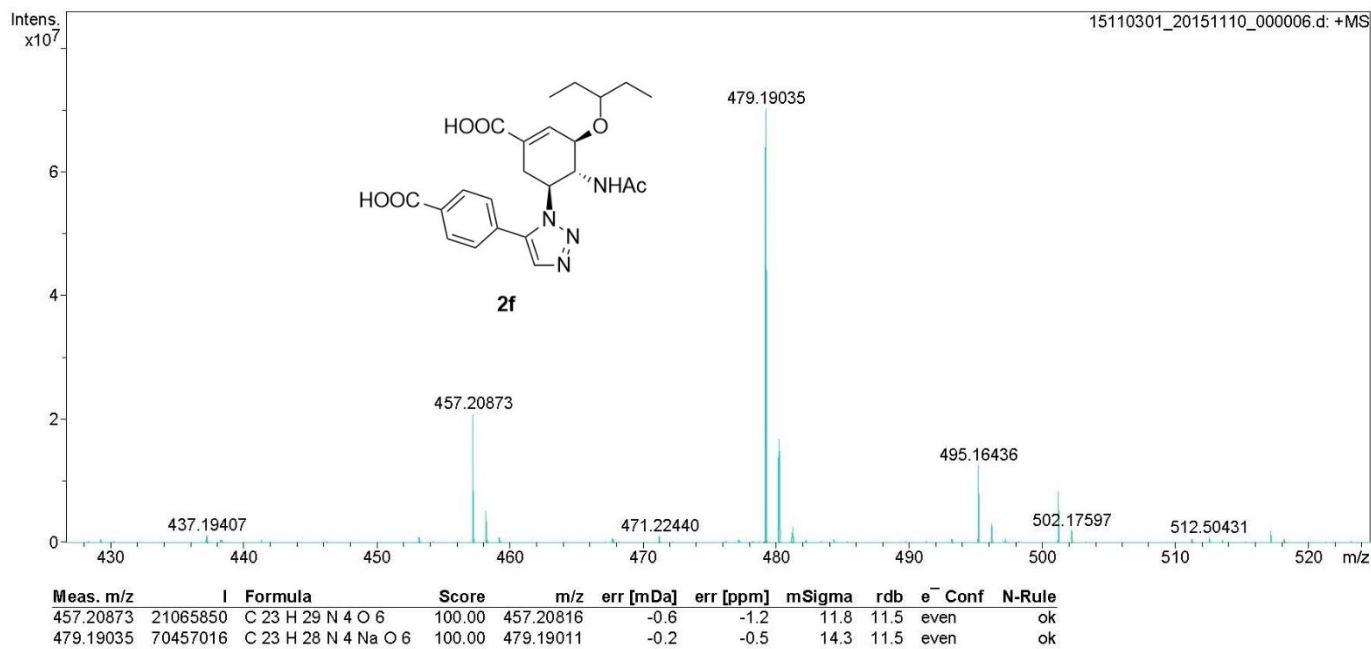

## IR of 2f

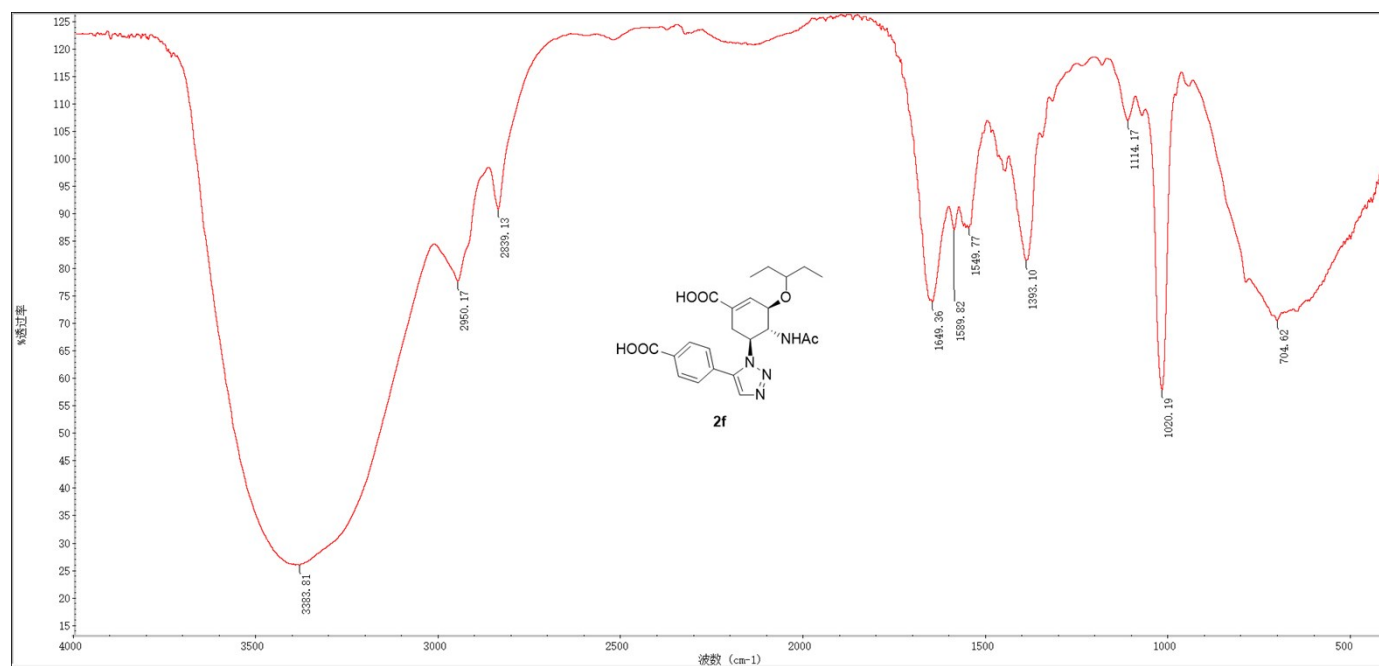

### <sup>1</sup>H NMR of 2g (500 MHz, CD<sub>3</sub>OD)

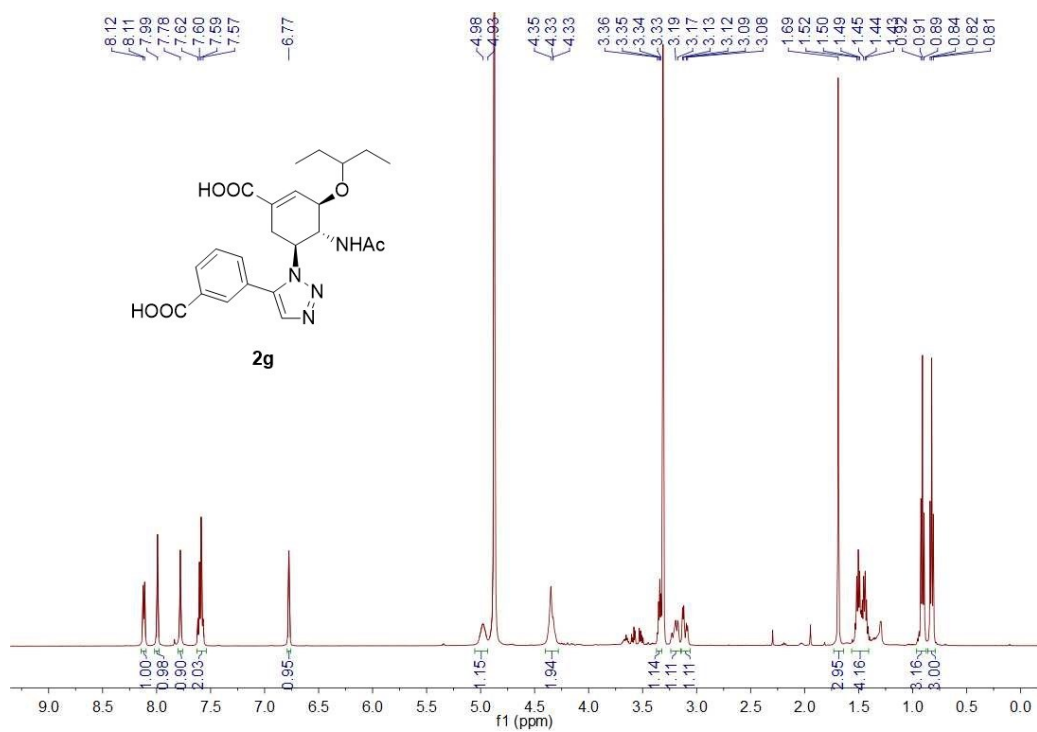

### <sup>13</sup>C NMR of 2g (500 MHz, CD<sub>3</sub>OD)

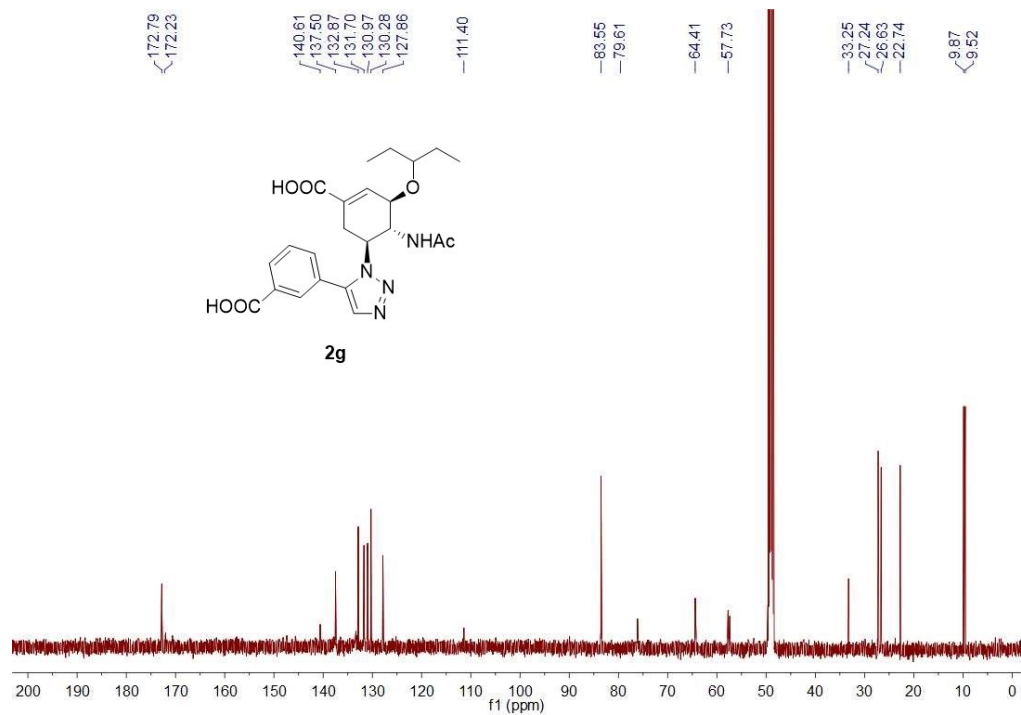

## HR-ESIMS of 2g

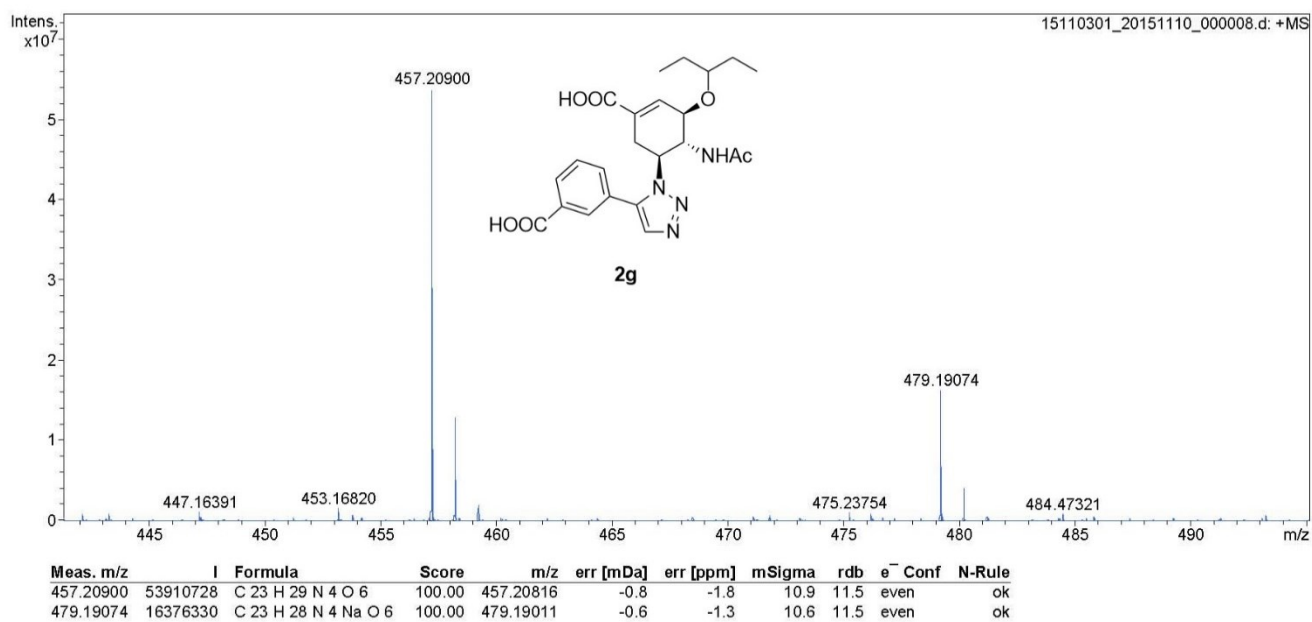

## IR of 2g

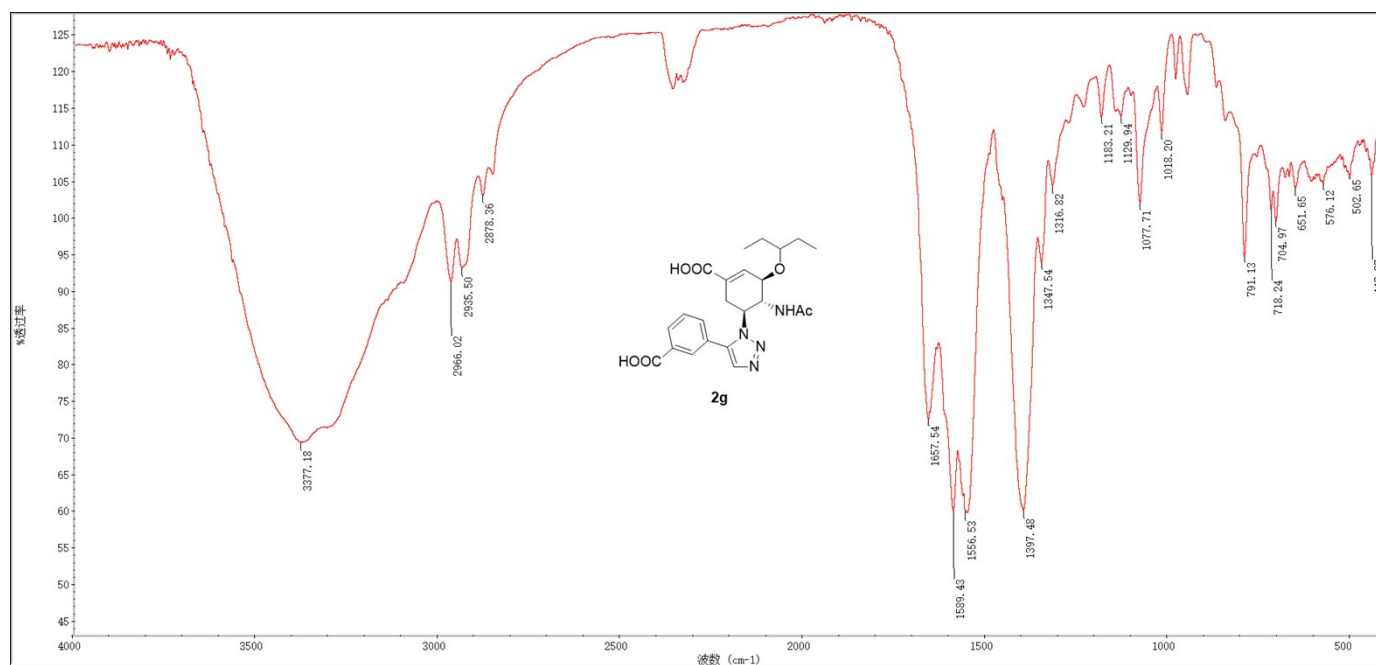



### $^1\text{H}$ NMR of 2h (500 MHz, $\text{CD}_3\text{OD}$ )

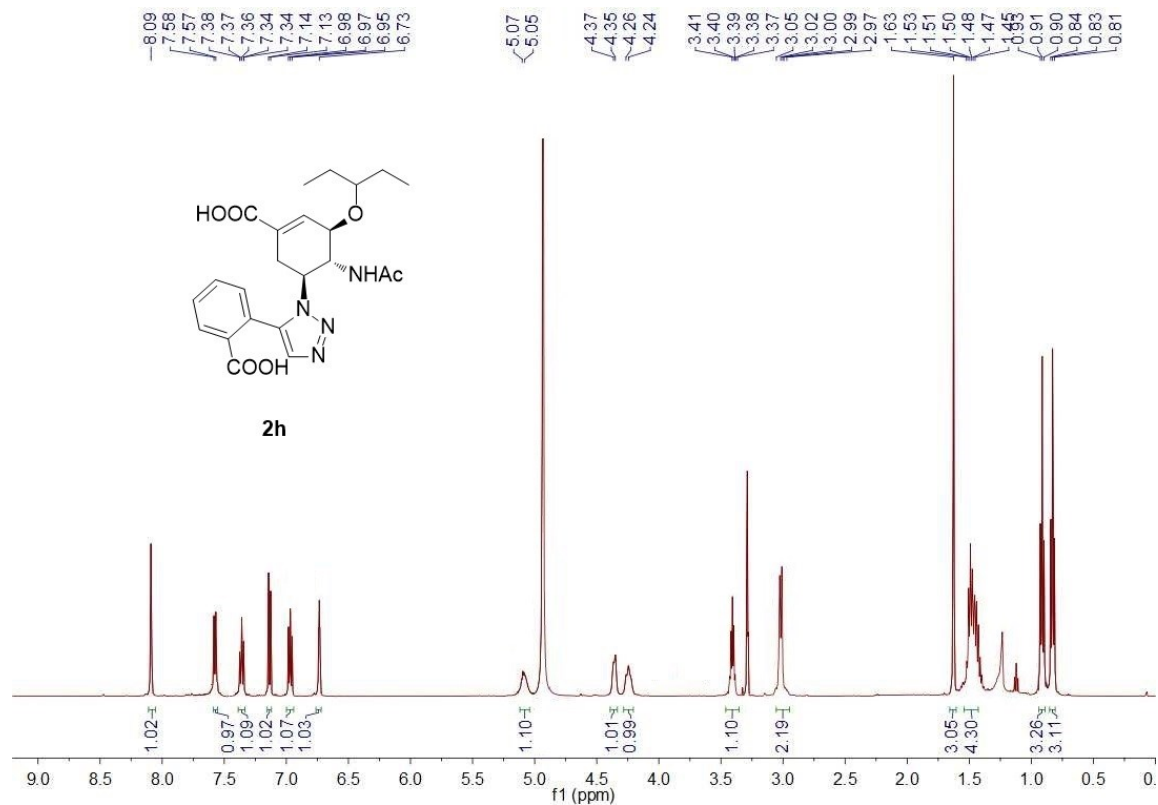

### $^{13}\text{C}$ NMR of 2h (500 MHz, $\text{CD}_3\text{OD}$ )

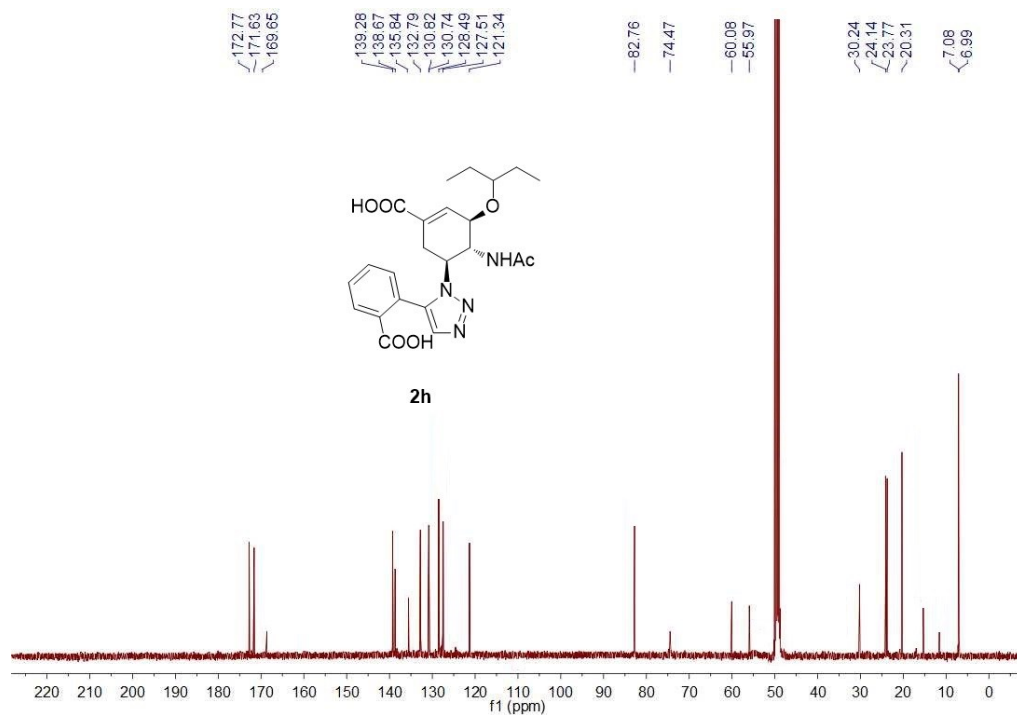

## HR-ESIMS of 2h

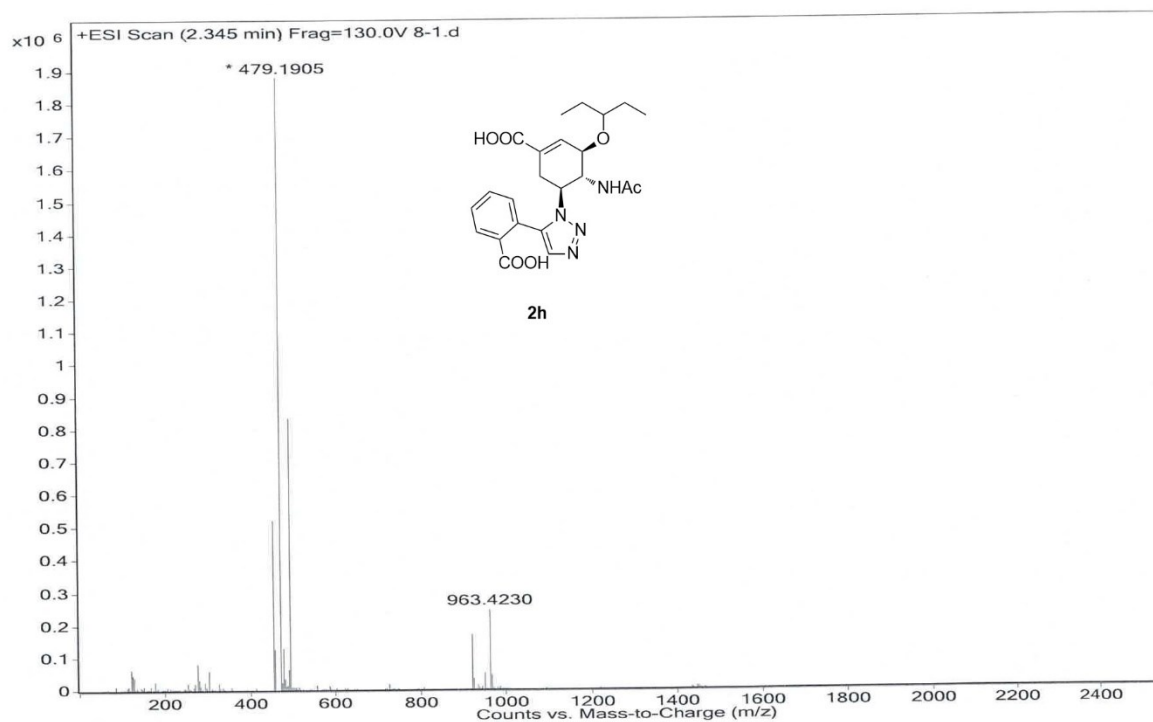

## IR of 2h

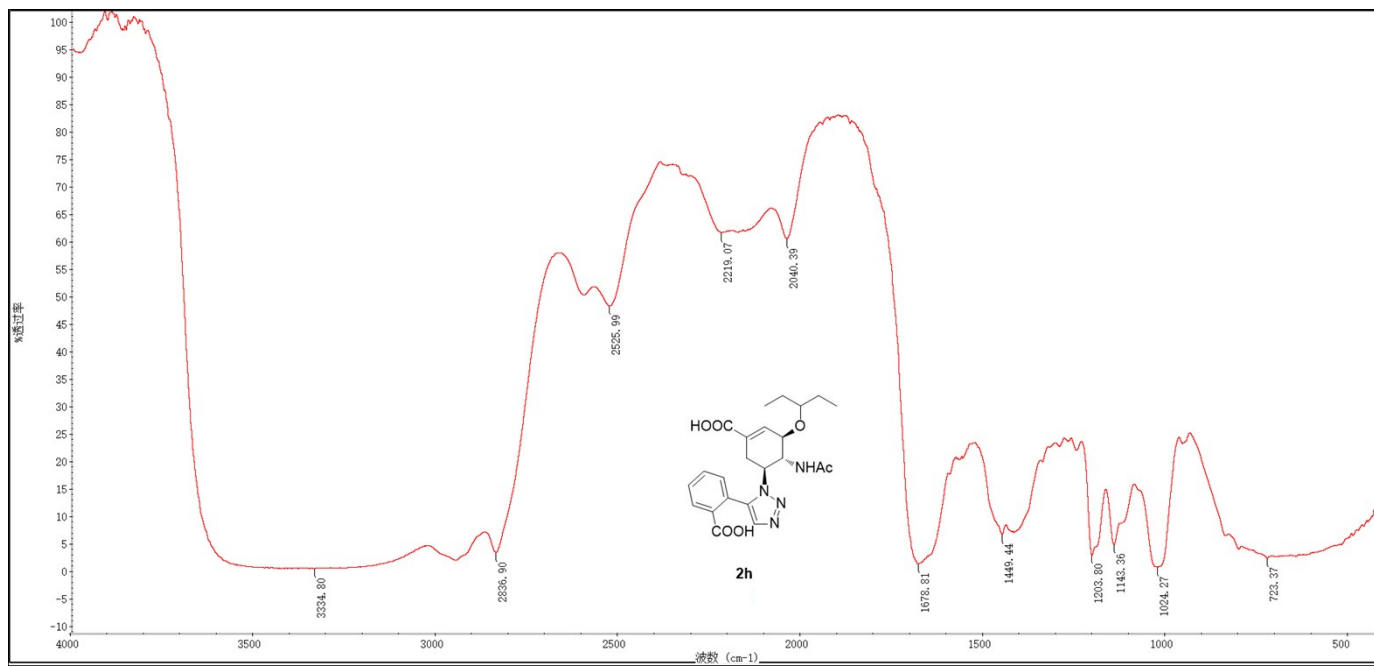

### $^1\text{H}$ NMR of 2i (500 MHz, $\text{CD}_3\text{OD}$ )

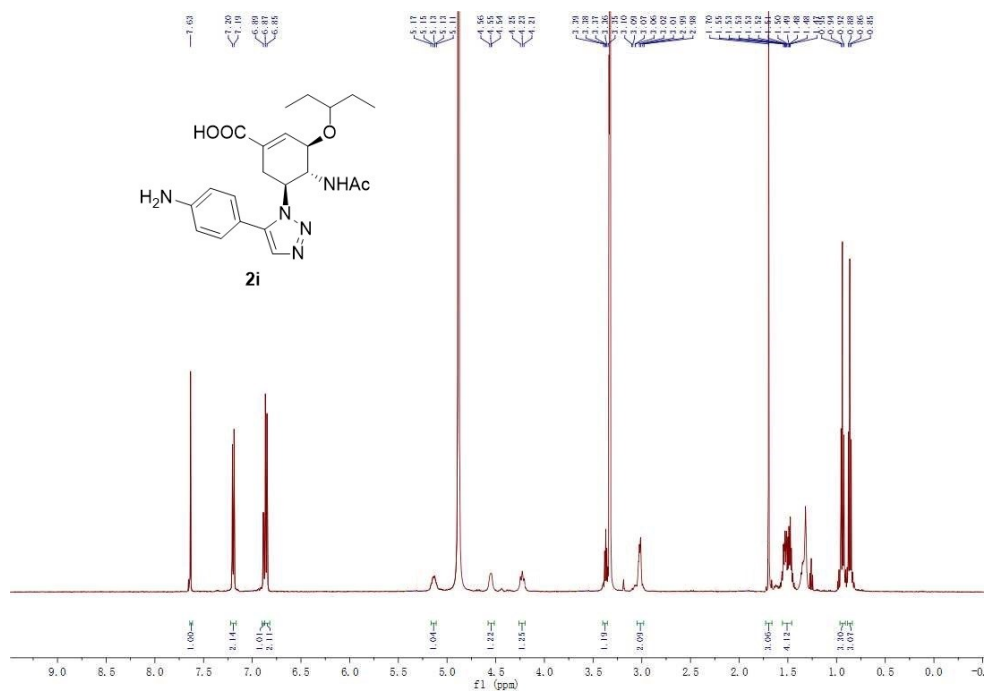

### $^{13}\text{C}$ NMR of 2i (500 MHz, $\text{CD}_3\text{OD}$ )

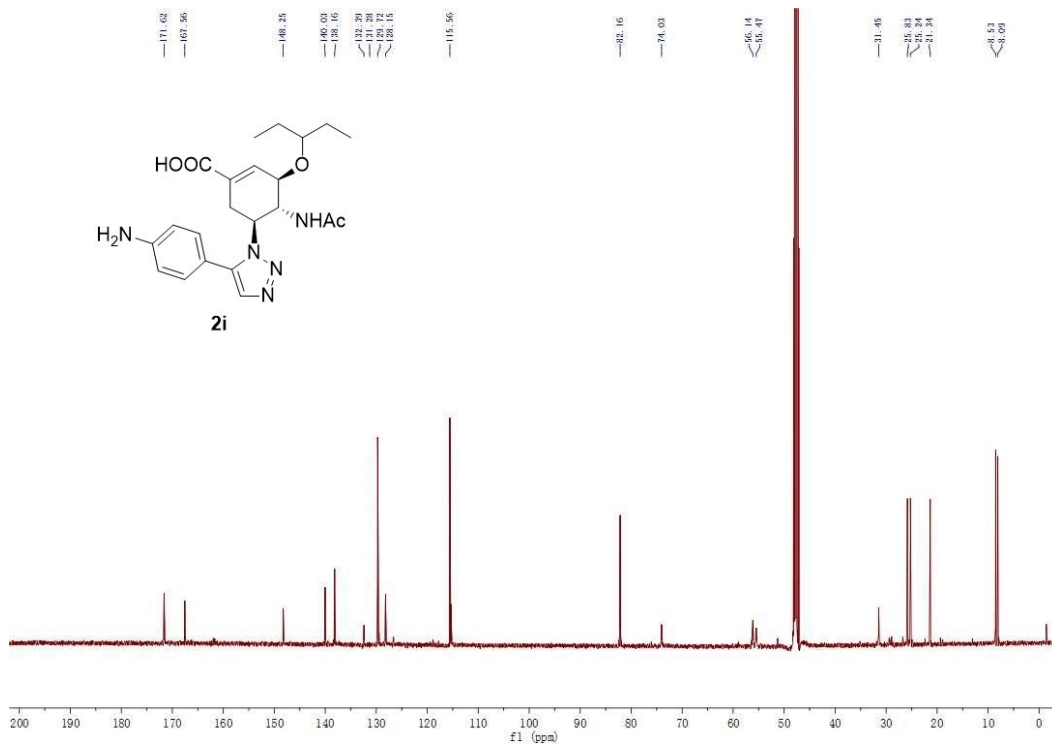

## HR-ESIMS of 2i

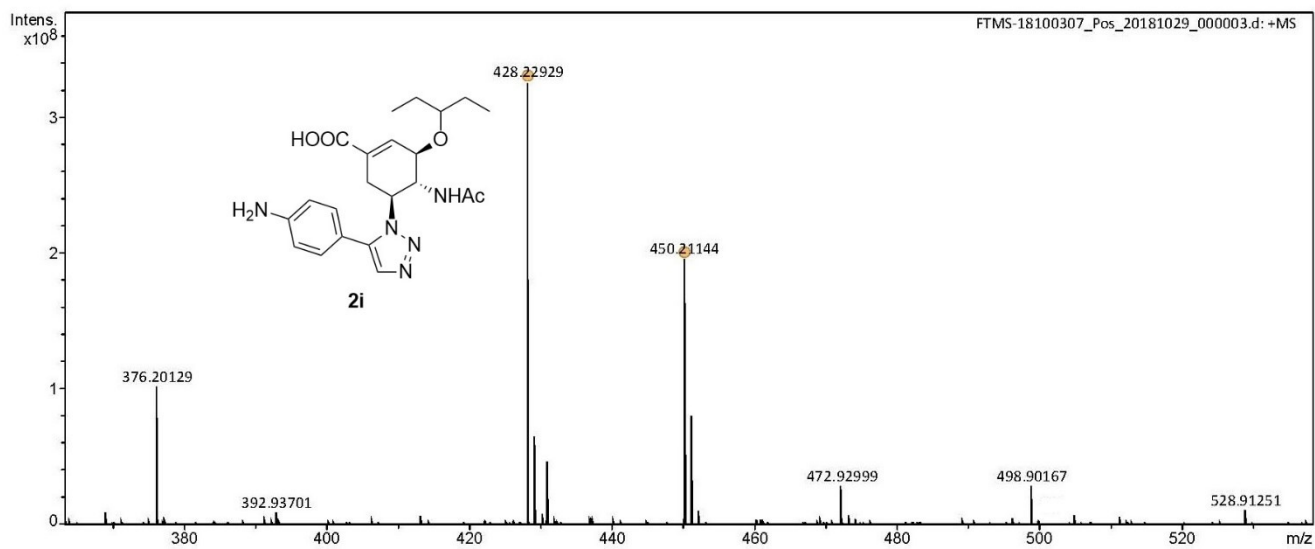

## IR of 2i

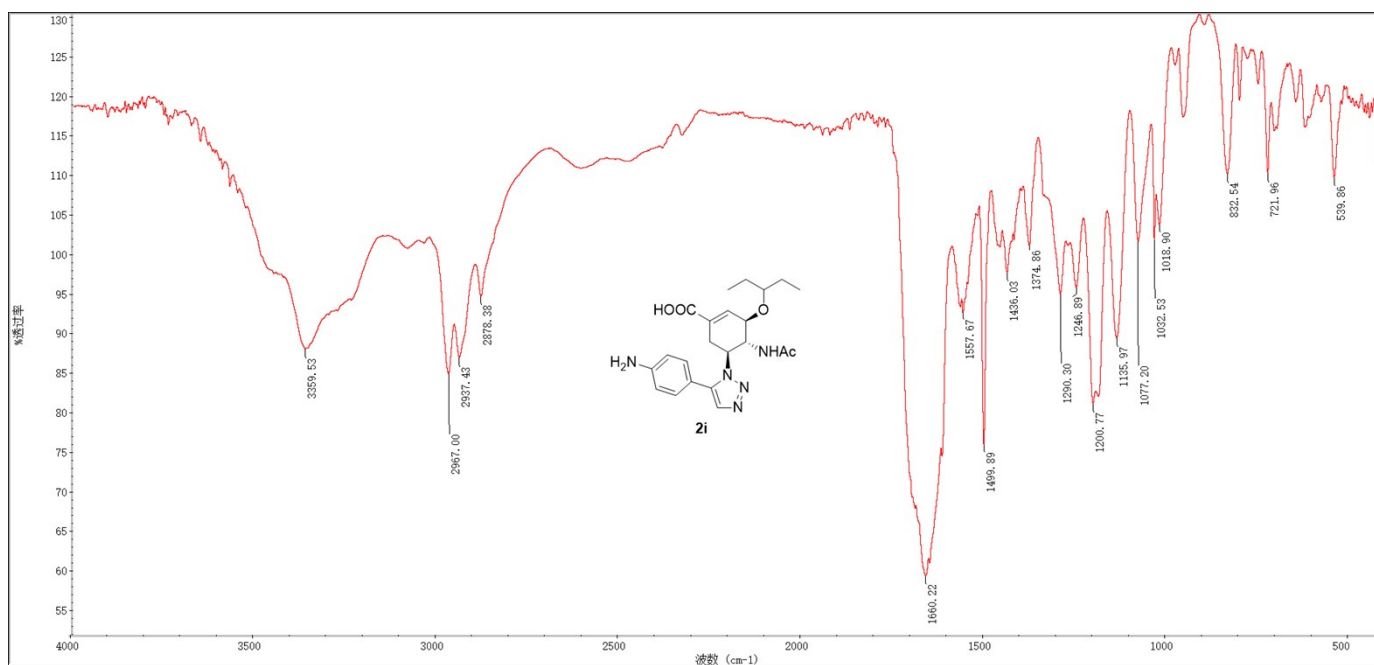

### <sup>1</sup>H NMR of 2j (500 MHz, CD<sub>3</sub>OD)

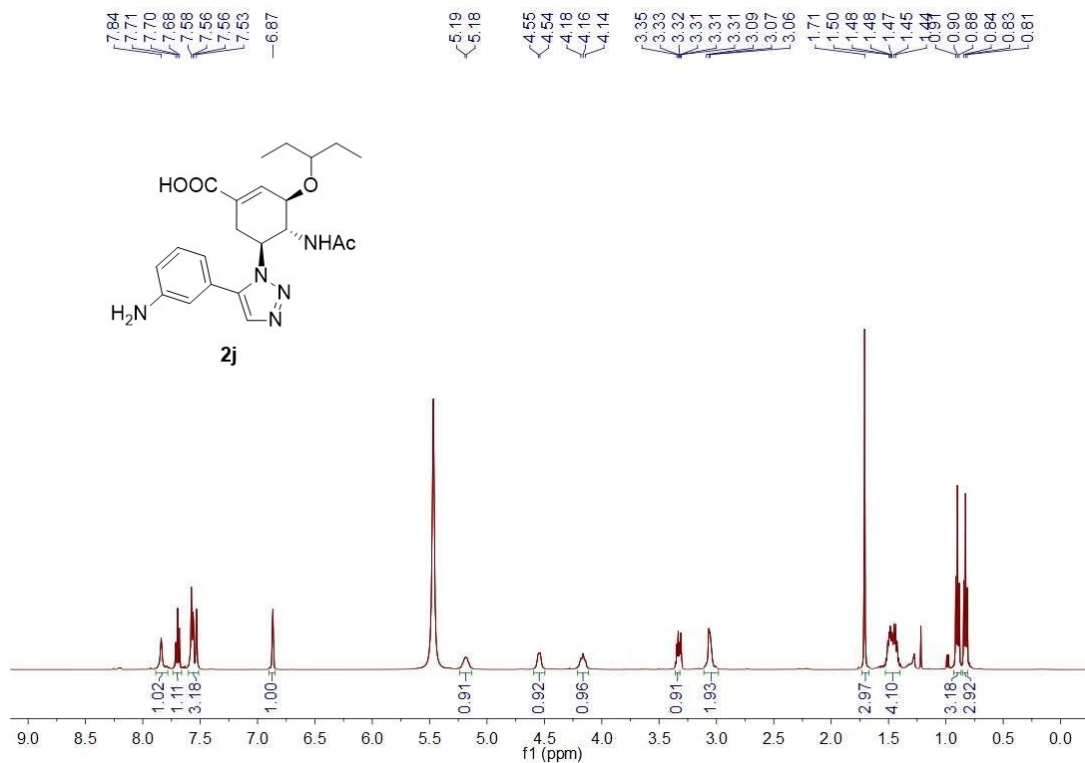

### <sup>13</sup>C NMR of 2j (500 MHz, CD<sub>3</sub>OD)

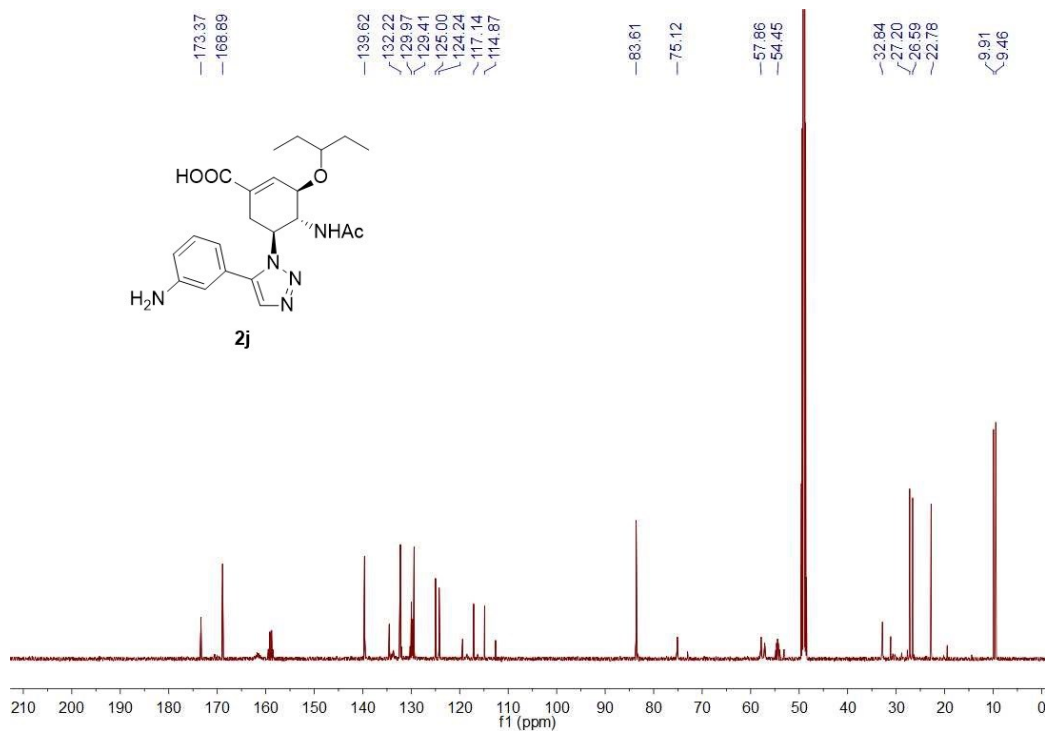

## HR-ESIMS of 2j

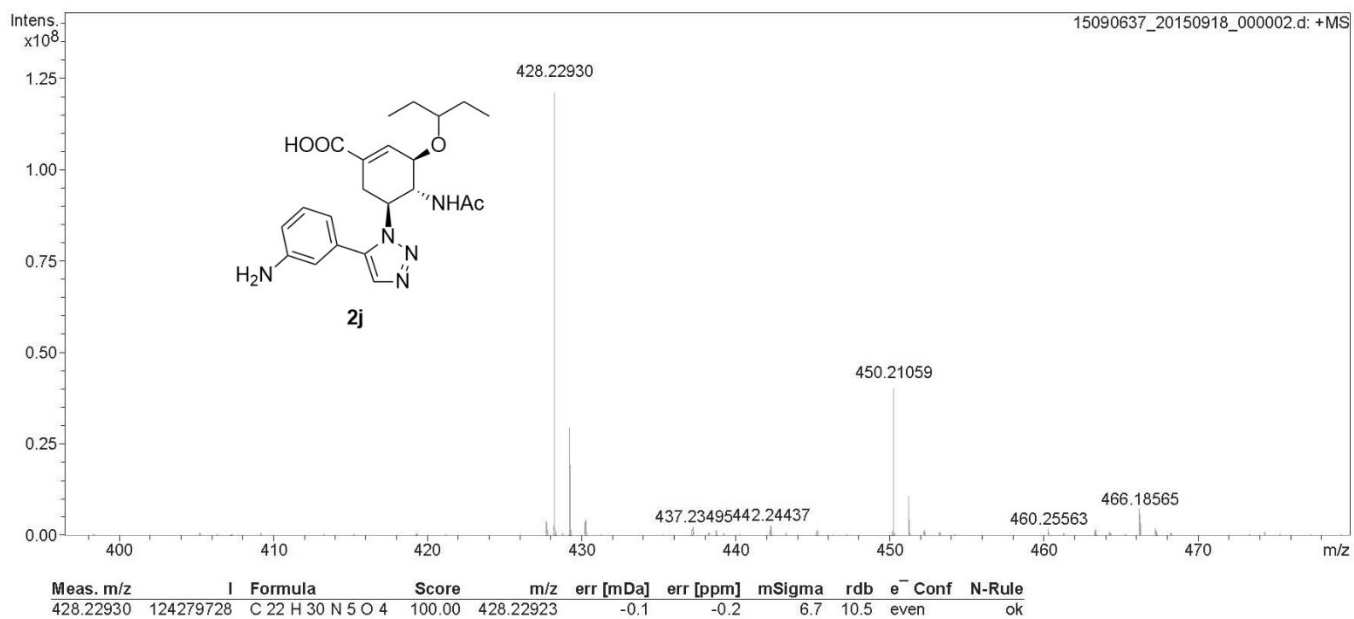

## IR of 2j

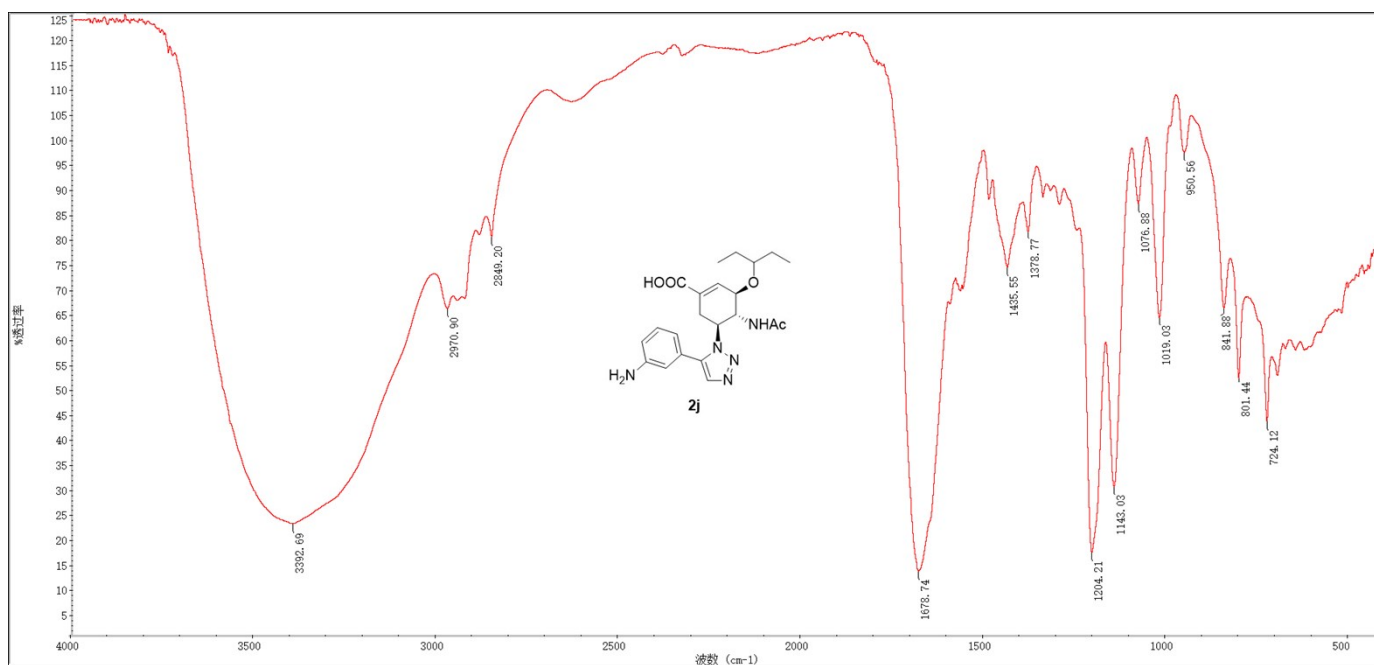

# <sup>1</sup>H NMR of 2k (500 MHz, CD<sub>3</sub>OD)

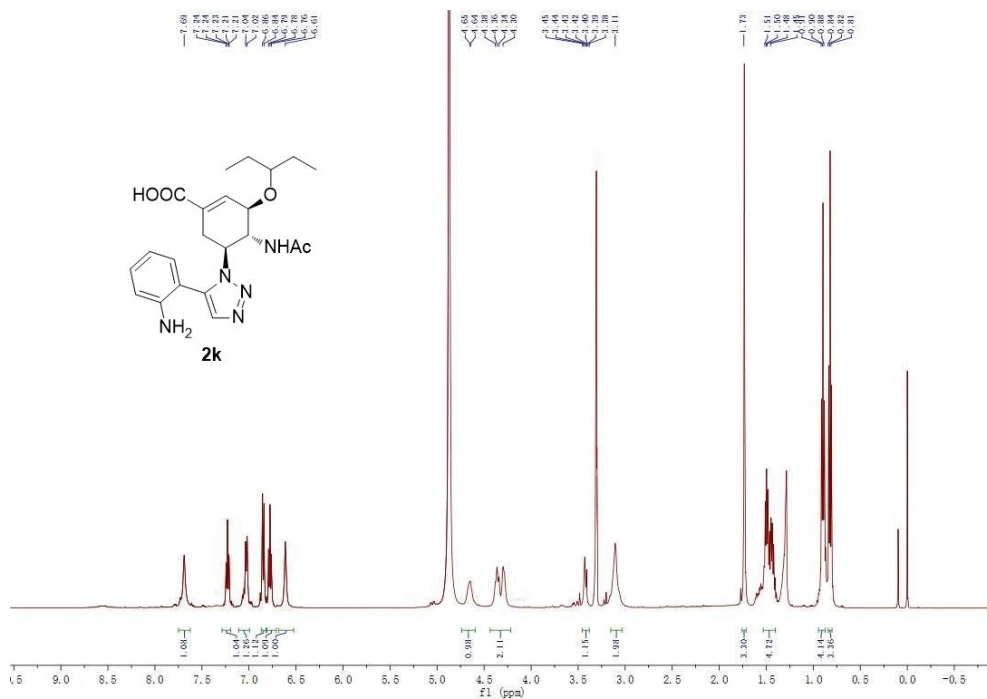

# <sup>13</sup>C NMR of 2k (500 MHz, CD<sub>3</sub>OD)

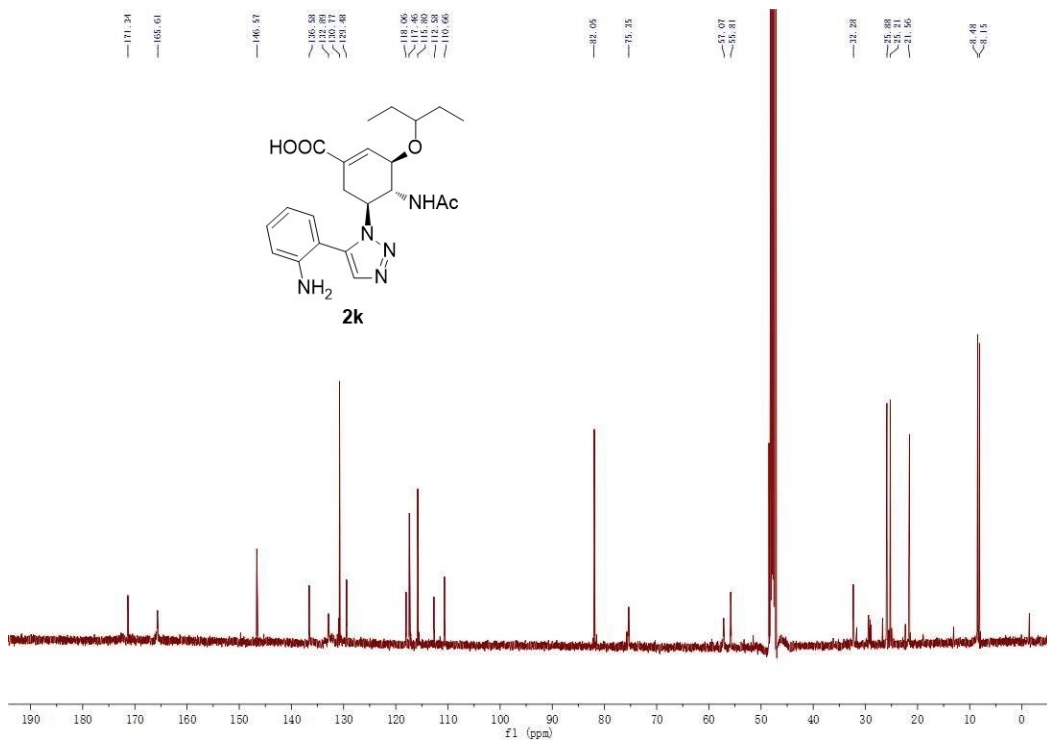

## HR-ESIMS of 2k

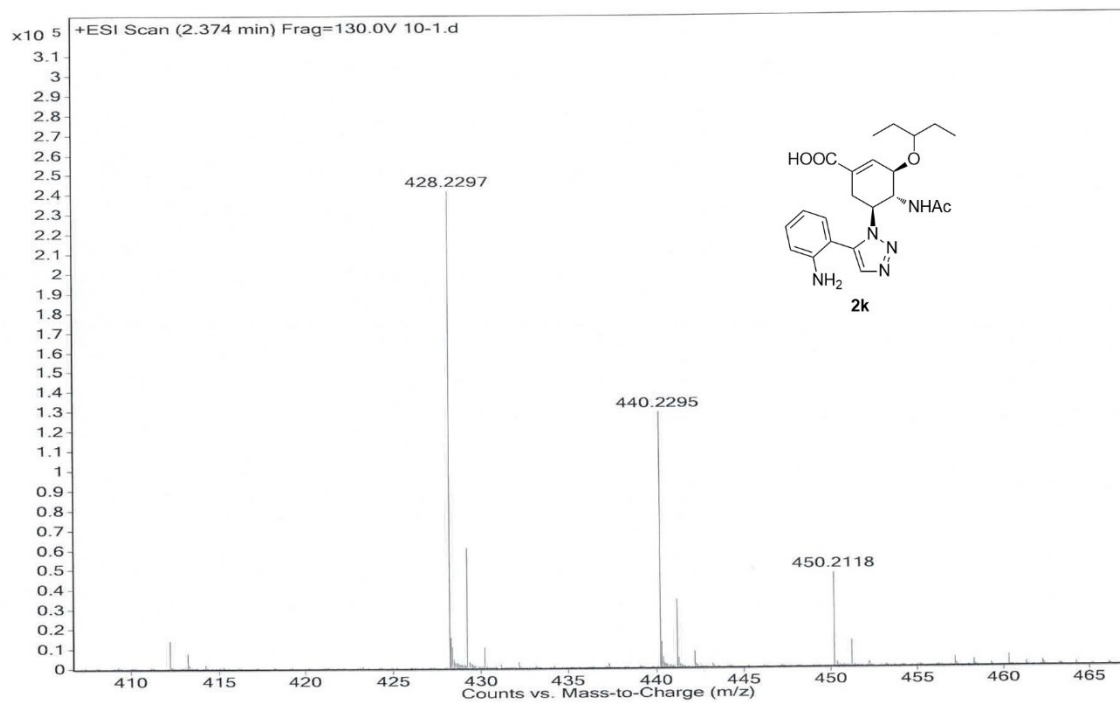

## IR of 2k

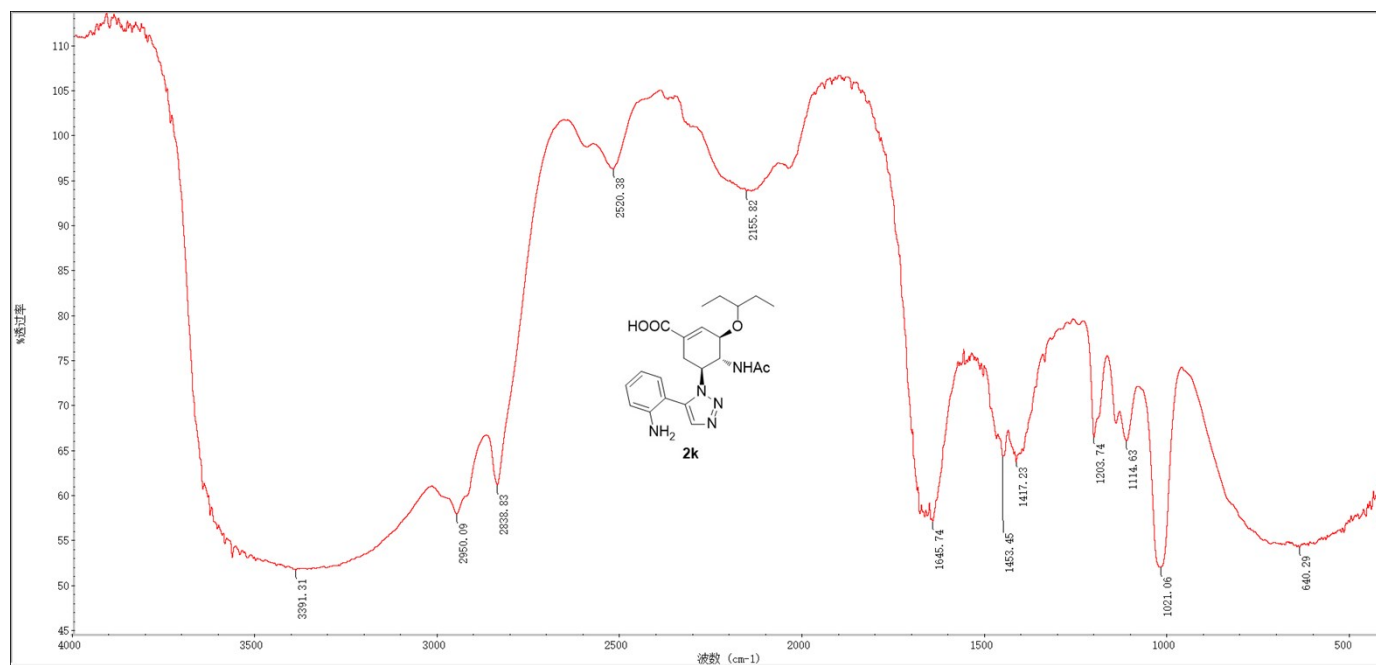



### <sup>1</sup>H NMR of 2l (500 MHz, CD<sub>3</sub>OD)

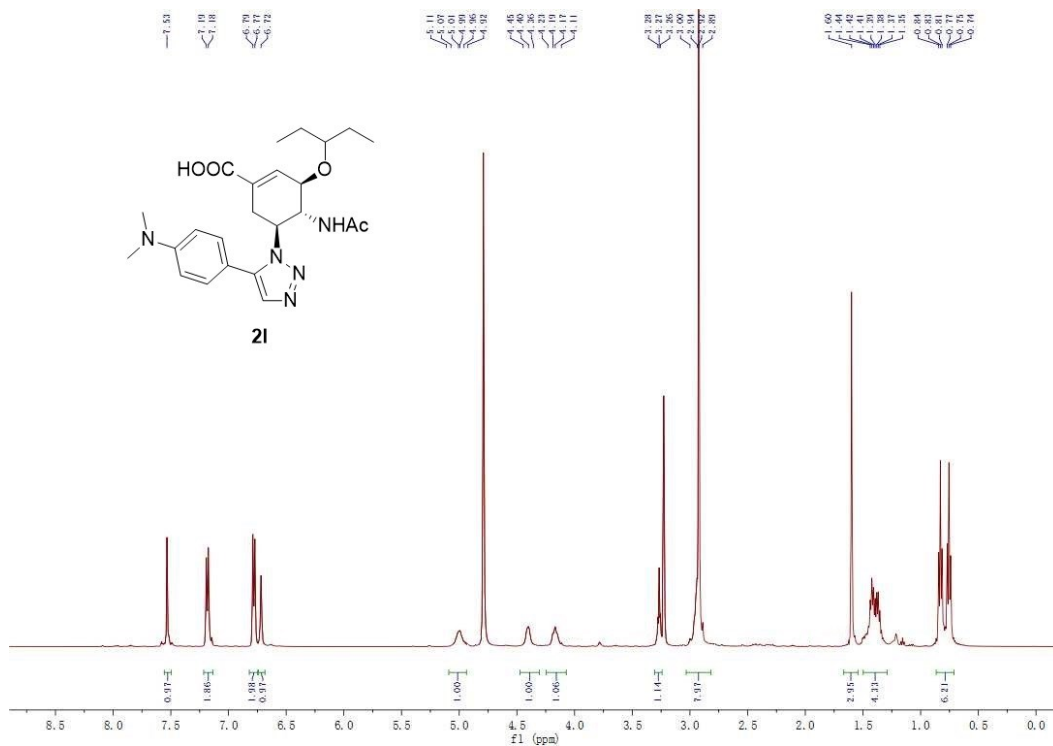

### <sup>13</sup>C NMR of 2l (500 MHz, CD<sub>3</sub>OD)

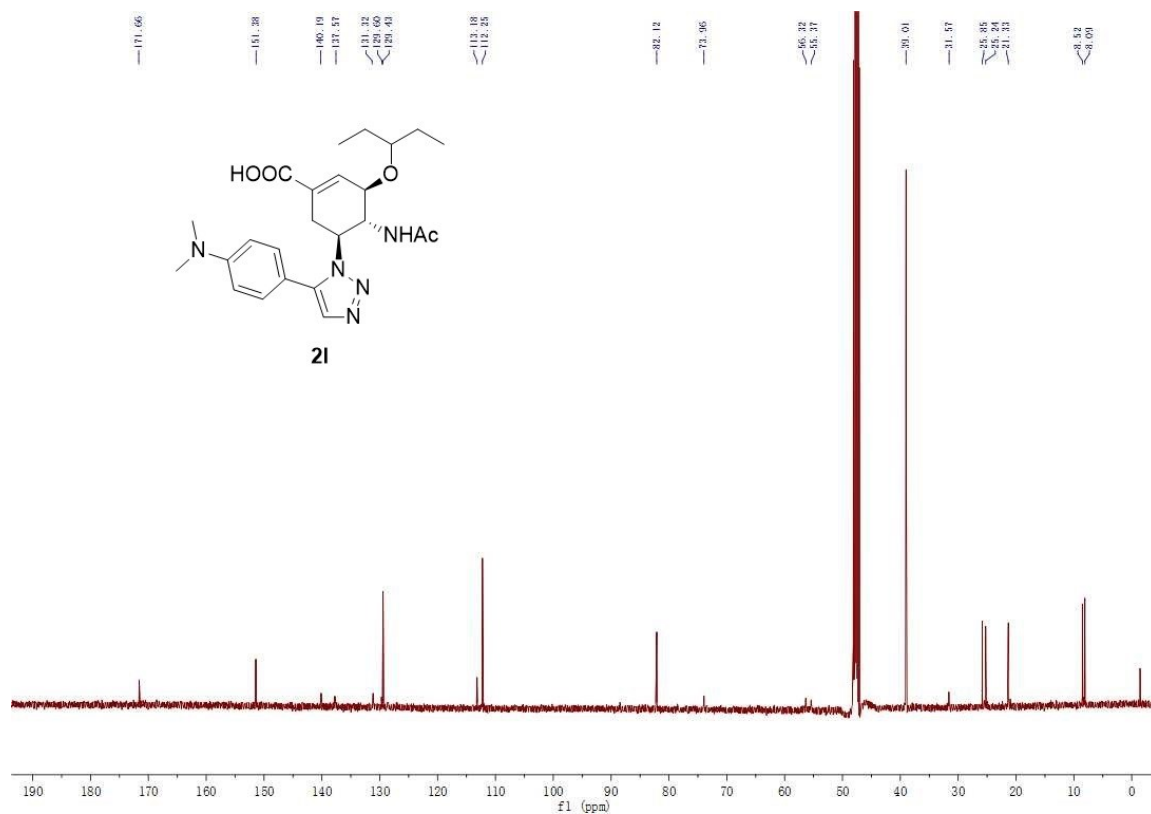

## HR-ESIMS of 2l

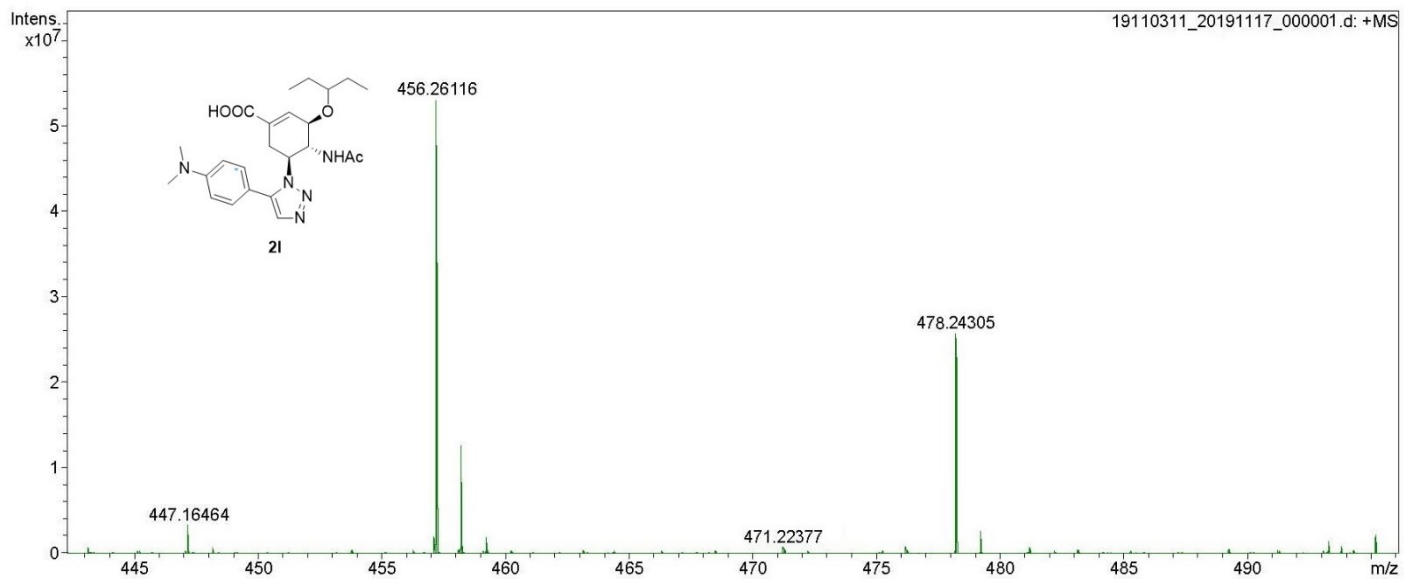

## IR of 2l

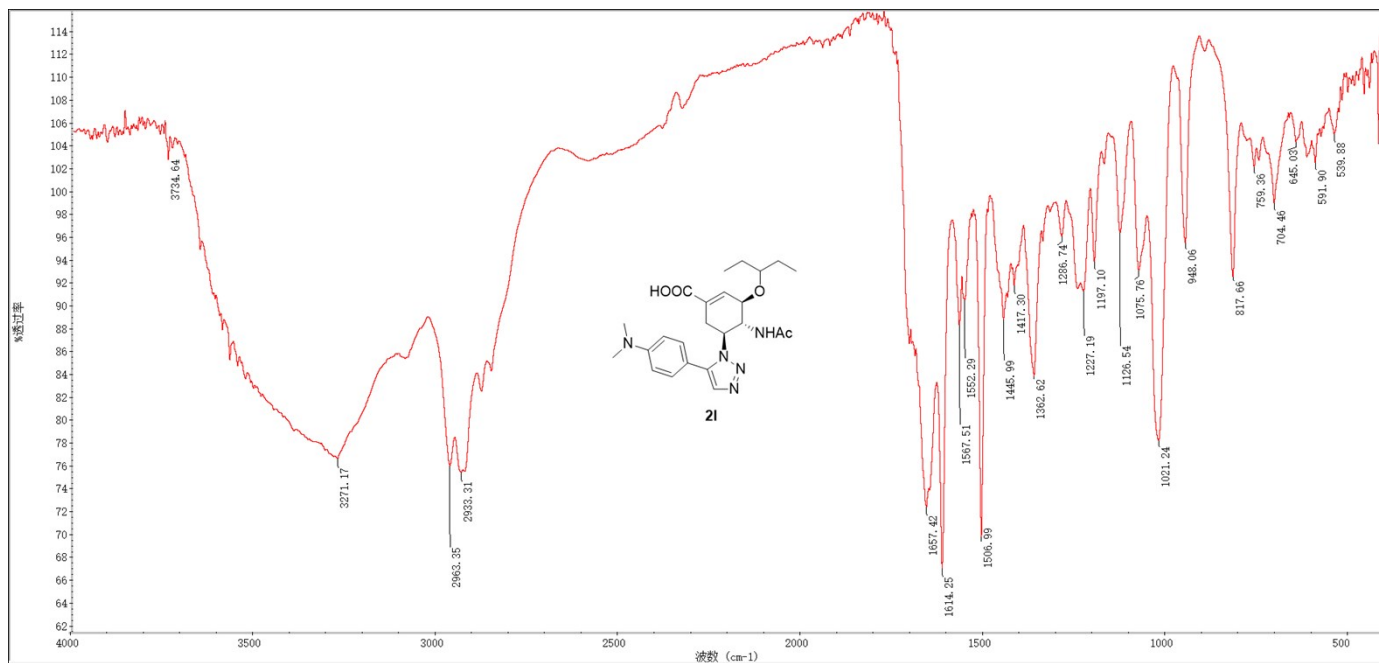

### $^1\text{H}$ NMR of 2m (500 MHz, $\text{CD}_3\text{OD}$ )

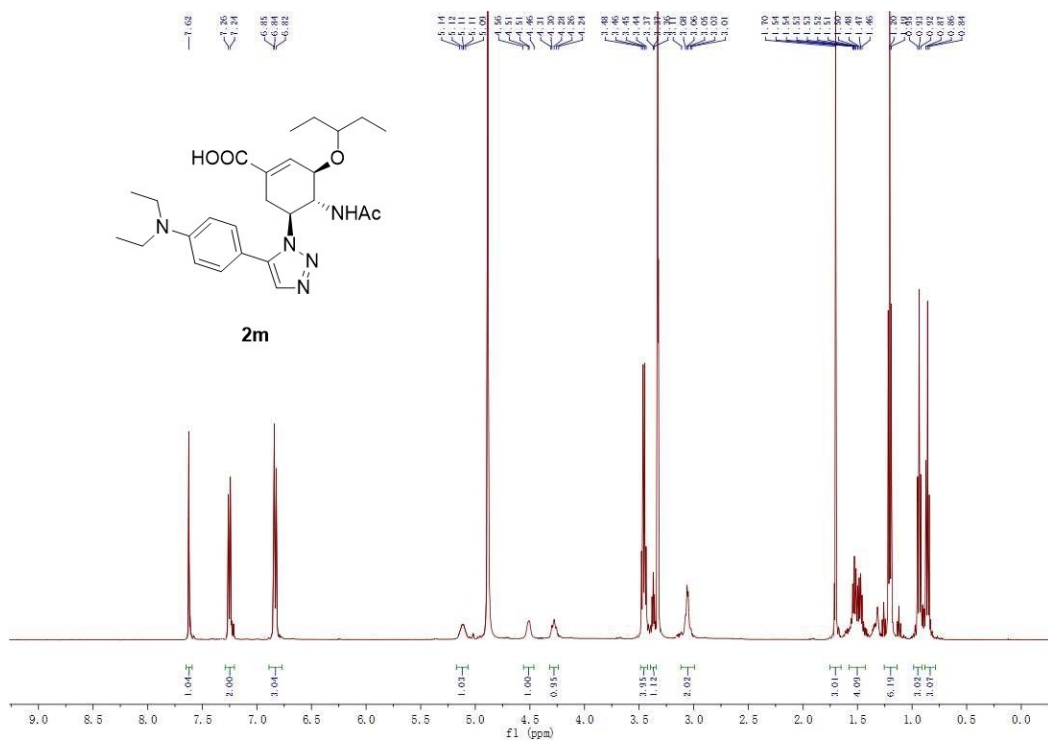

### $^{13}\text{C}$ NMR of 2m (500 MHz, $\text{CD}_3\text{OD}$ )

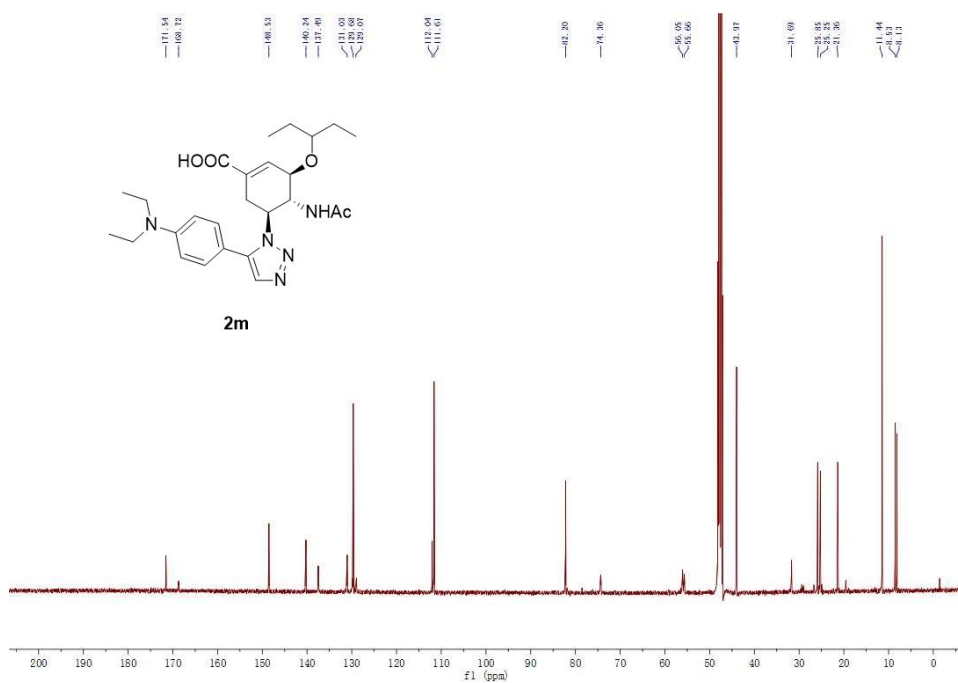

## HR-ESIMS of 2m

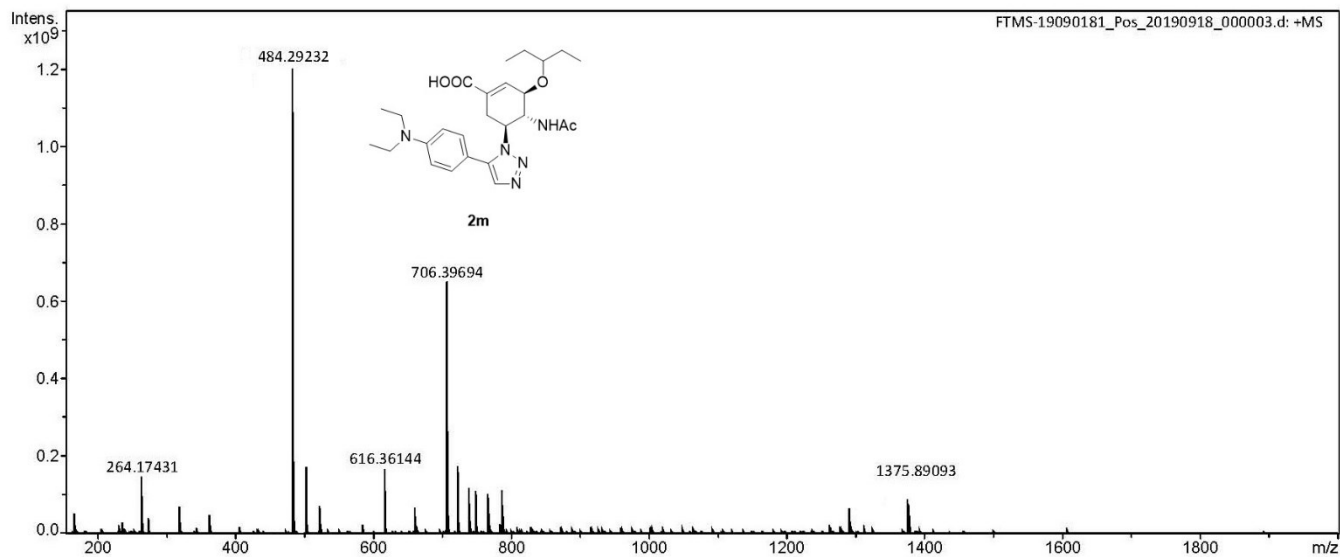

## IR of 2m

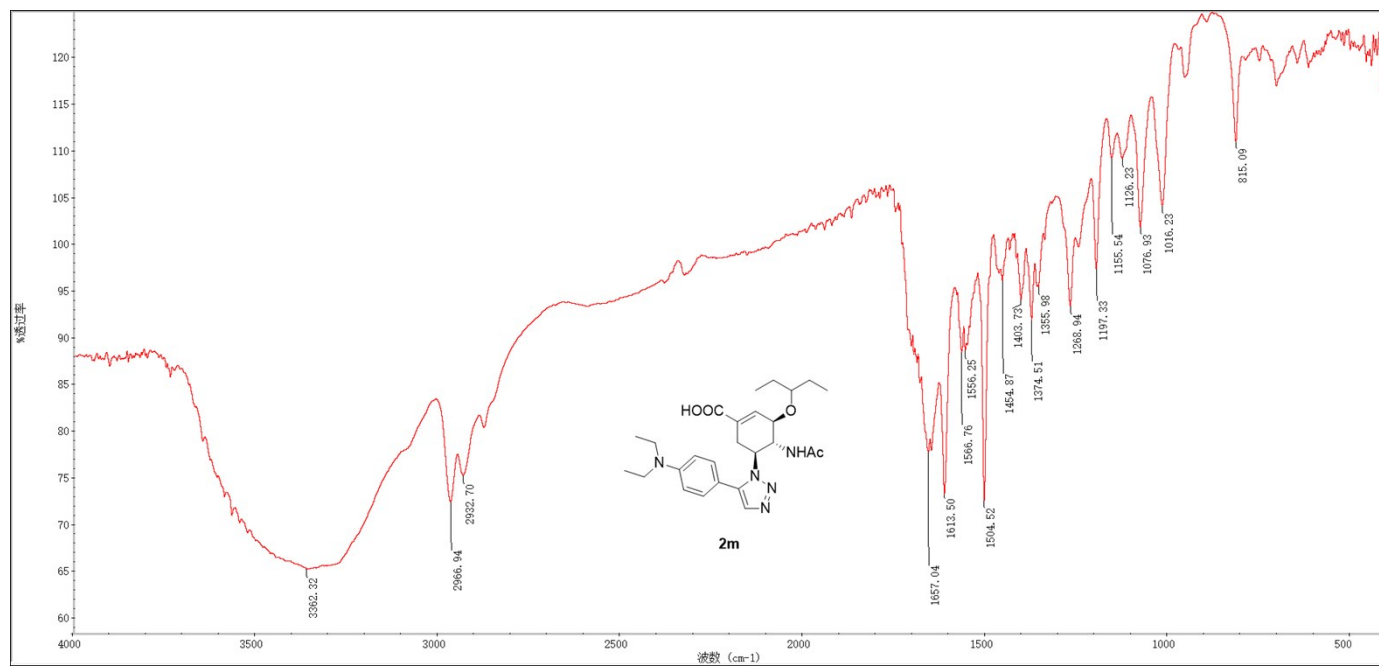

### $^1\text{H}$ NMR of **2n** (500 MHz, $\text{CD}_3\text{OD}$ )

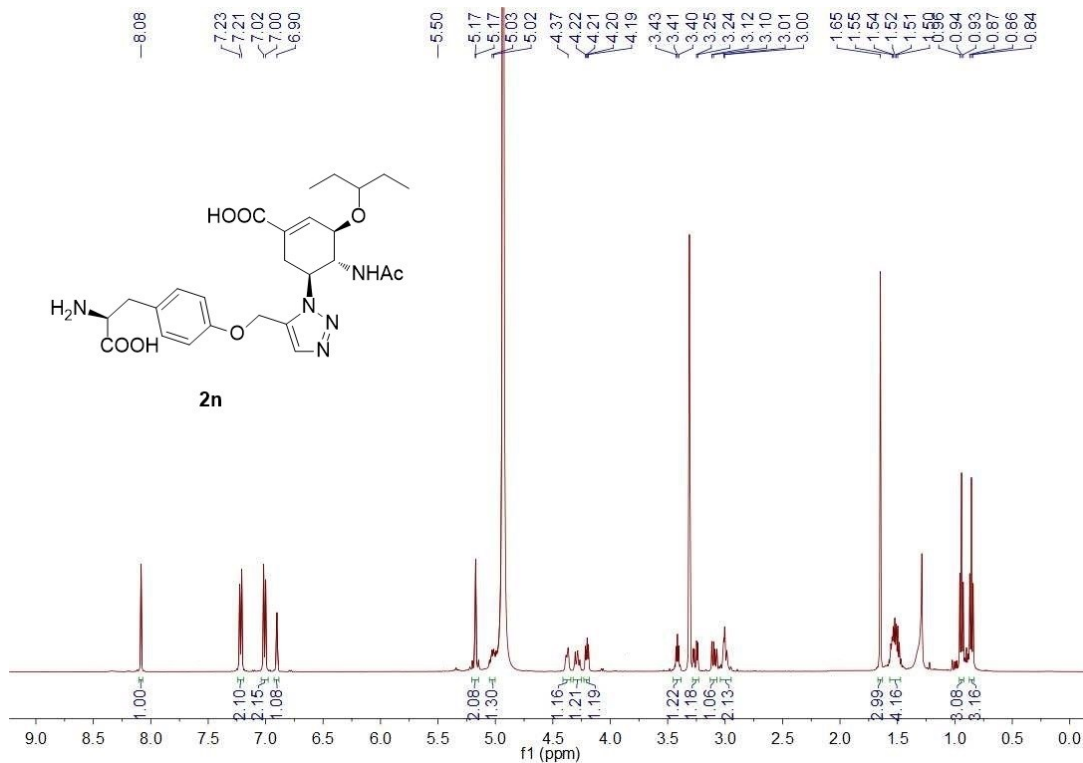

### $^{13}\text{C}$ NMR of **2n** (500 MHz, $\text{CD}_3\text{OD}$ )

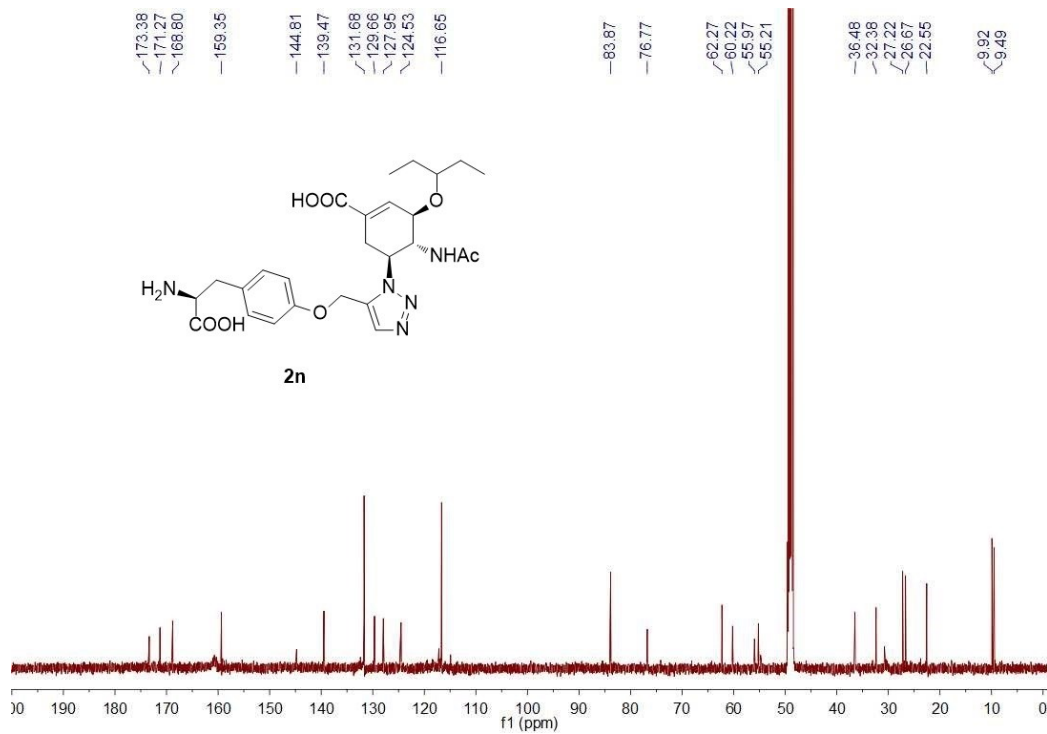

## HR-ESIMS of 2n

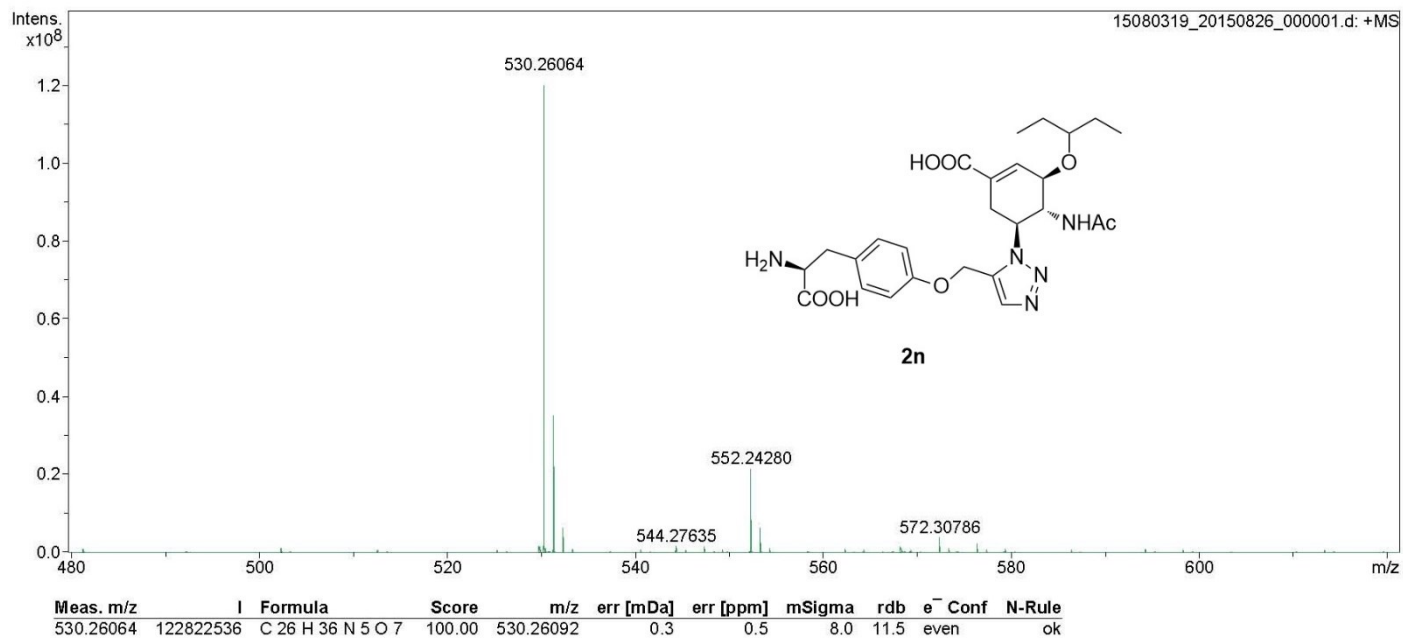

## IR of 2n

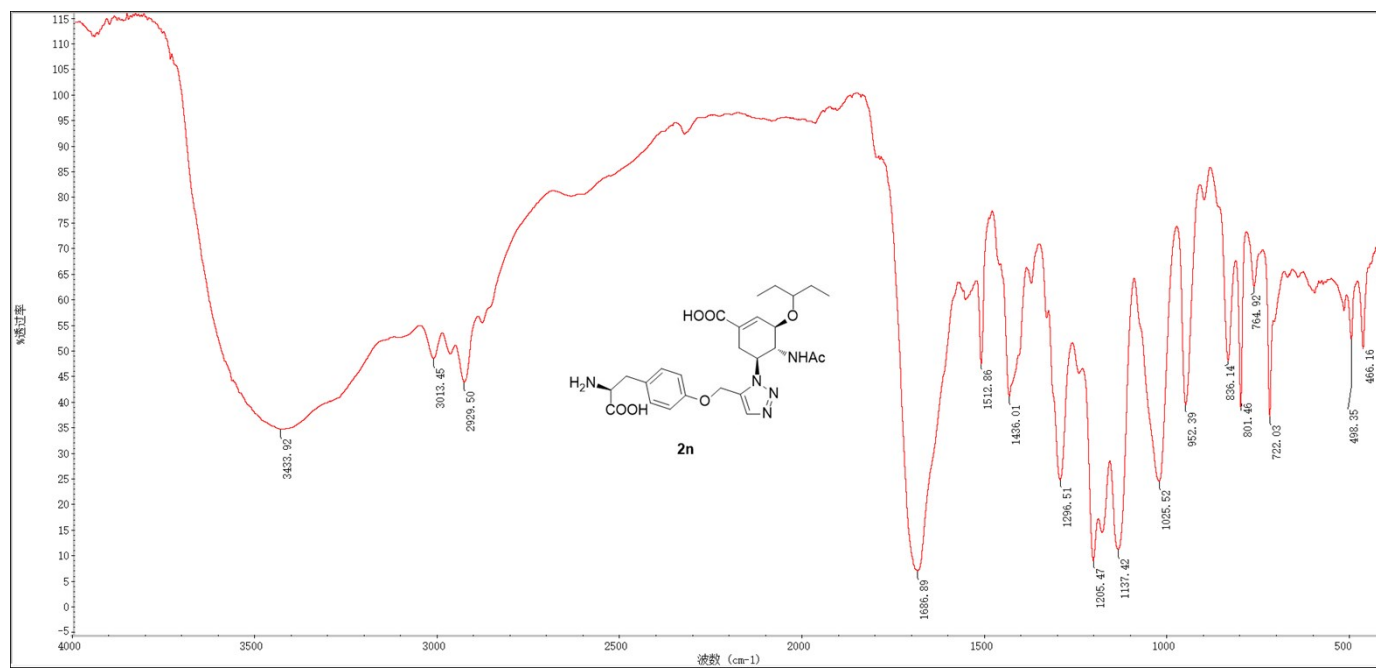

Supplement: d1ra00472g2.pdf [file d1ra00472g2.pdf]
